# Supplementary material for: Maize protein phosphatase gene family: identification and molecular characterization
Source: PubMed Central journal article supplement (PMC4169795; doi:10.1186/1471-2164-15-773), 2014-09-09
Supplement: 12864_2014_6458_MOESM8_ESM.pdf [file 12864_2014_6458_MOESM8_ESM.pdf]

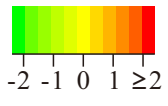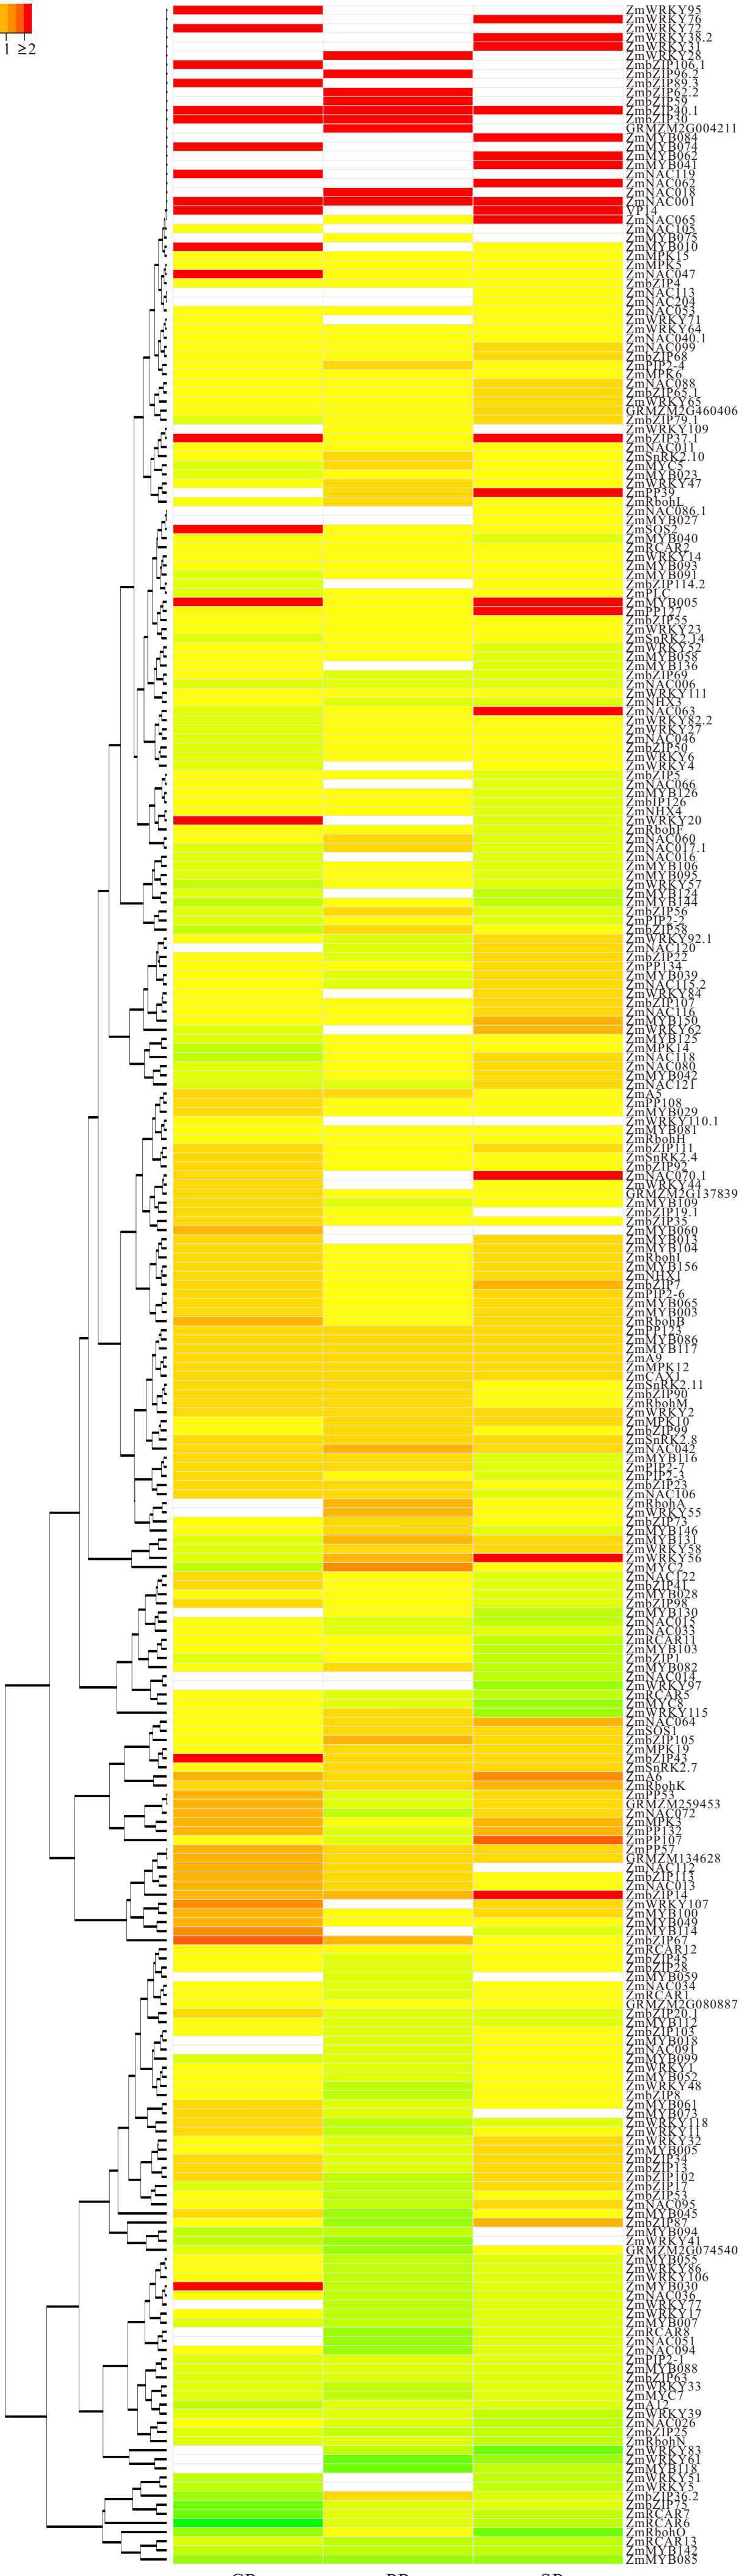

- ZmWRKY95
- ZmWRKY76
- ZmWRKY75
- ZmWRKY38.2
- ZmWRKY31
- ZmWRKY28
- ZmbZIP106.1
- ZmbZIP86.4
- ZmbZIP85.2
- ZmbZIP56
- ZmbZIP40.1
- ZmbZIP30
- GRMZM2G004211
- ZmMYB084
- ZmMYB074
- ZmMYB047
- ZmNAC119
- ZmNAC062
- ZmNAC018
- ZmNAC001
- VPI4
- ZmNAC065
- ZmMYB075
- ZmMYB010
- ZmMPK15
- ZmMPK5
- ZmNAC047
- ZmbZIP4
- ZmNAC13
- ZmNAC204
- ZmNAC053
- ZmWRKY71
- ZmWRKY64
- ZmNAC040.1
- ZmNAC099
- ZmbZIP68
- ZmbZIP4
- ZmMPK4
- ZmNAC088
- ZmbZIP65.1
- ZmWRKY65
- GRMZM2G460406
- ZmbZIP79.1
- ZmWRKY109
- ZmNAC011
- ZmSnRK2.10
- ZmMYC5
- ZmMYB023
- ZmWRKY47
- ZmP39
- ZmRbohL
- ZmNAC086.1
- ZmMYB027
- ZmSOS2
- ZmMYB040
- ZmRCAR2
- ZmWRKY94
- ZmMYB091
- ZmbZIP114.2
- ZmPLC
- ZmMYB005
- ZmPPI27
- ZmbZIP55
- ZmWRKY23
- ZmWRKY52
- ZmMYB058
- ZmMYB136
- ZmbZIP69
- ZmNAC006
- ZmWRKY111
- ZmNAC063
- ZmWRKY82.2
- ZmWRKY27.2
- ZmNAC046
- ZmbZIP50
- ZmWRKY6
- ZmWRKY4
- ZmbZIP066
- ZmMYB126
- ZmbZIP26
- ZmNHX4
- ZmWRKY20
- ZmRbohF
- ZmNAC060
- ZmNAC016
- ZmMYB106
- ZmMYB095
- ZmWRKY57
- ZmMYB124
- ZmMYB144
- ZmbZIP56
- ZmbZIP58
- ZmWRKY92.1
- ZmNAC120
- ZmbZIP22
- ZmPPI34
- ZmMYB039
- ZmWRKY84
- ZmbZIP107
- ZmNAC116
- ZmMYB150
- ZmWRKY62
- ZmMYB125
- ZmNAC148
- ZmNAC080
- ZmMYB042
- ZmNAC121
- ZmA5
- ZmPPI08
- ZmMYB029
- ZmWRKY10.1
- ZmRbohH
- ZmbZIP11
- ZmSnRK2.4
- ZmbZIP92
- ZmNAC070.1
- GRMZM2G137839
- ZmMYB109
- ZmbZIP19.1
- ZmbZIP35
- ZmMYB060
- ZmMYB013
- ZmMYB104
- ZmRbohI
- ZmMYB156
- ZmNHX1
- ZmbZIP7
- ZmPIP2-6
- ZmMYB065
- ZmMYB003
- ZmRbohB
- ZmPPI7
- ZmMYB086
- ZmMYB117
- ZmA9
- ZmMPK12
- ZmCAX
- ZmSnRK2.11
- ZmbZIP90
- ZmRbohY2
- ZmMPK10
- ZmbZIP99
- ZmSnRK2.8
- ZmNAC042
- ZmMYB116
- ZmbZIP53
- ZmbZIP23
- ZmNAC106
- ZmRbohA
- ZmWRKY55
- ZmbZIP73
- ZmMYB146
- ZmWRKY58
- ZmWRKY56
- ZmMYC2
- ZmNAC122
- ZmbZIP41
- ZmMYB028
- ZmbZIP93
- ZmMYB130
- ZmNAC015
- ZmNAC033
- ZmRCAR11
- ZmMYB103
- ZmbZIP1
- ZmMYB082
- ZmNAC014
- ZmWRKY97
- ZmRCAR5
- ZmMYC8
- ZmWRKY115
- ZmNAC064
- ZmSOS1
- ZmbZIP105
- ZmMPK19
- ZmbZIP43
- ZmSnRK2.7
- ZmA6
- ZmRbohK
- ZmPPI23
- GRMZM259453
- ZmMPK072
- ZmPPI32
- ZmPPI07
- ZmPP57
- GRMZM134628
- ZmNAC112
- ZmbZIP113
- ZmbZIP14
- ZmWRKY107
- ZmMYB100
- ZmMYB049
- ZmMYB114
- ZmbZIP67
- ZmRCAR12
- ZmCAX4
- ZmbZIP28
- ZmMYB059
- ZmNAC034
- ZmRCAR1
- GRMZM2G080887
- ZmbZIP20.1
- ZmbZIP103
- ZmMYB018
- ZmNAC091
- ZmMYB099
- ZmWRKY1
- ZmMYB052
- ZmWRKY48
- ZmMYB073
- ZmWRKY118
- ZmWRKY11
- ZmWRKY32
- ZmMYB005
- ZmbZIP13
- ZmbZIP102
- ZmbZIP17
- ZmbZIP53
- ZmNAC095
- ZmMYB045
- ZmbZIP8
- ZmWRKY41
- GRMZM2G074540
- ZmMYB055
- ZmWRKY86
- ZmWRKY106
- ZmMYB030
- ZmWRKY036
- ZmWRKY17
- ZmMYB007
- ZmRCAR8
- ZmNAC051
- ZmNAC094
- ZmMYB1
- ZmMYB088
- ZmbZIP08
- ZmWRKY33
- ZmMYC7
- ZmA12
- ZmWRKY39
- ZmNAC026
- ZmbZIP92
- ZmRbohN
- ZmRbohY83
- ZmWRKY61
- ZmMYB118
- ZmWRKY51
- ZmWRKY5
- ZmbZIP36.2
- ZmRCAR7
- ZmRCAR6
- ZmRbohO
- ZmRCAR13
- ZmMYB142
- ZmMYB085
