# Supplementary material for: Maize protein phosphatase gene family: identification and molecular characterization
Source: PubMed Central journal article supplement (PMC4169795; doi:10.1186/1471-2164-15-773), 2014-09-09

control cold treatment

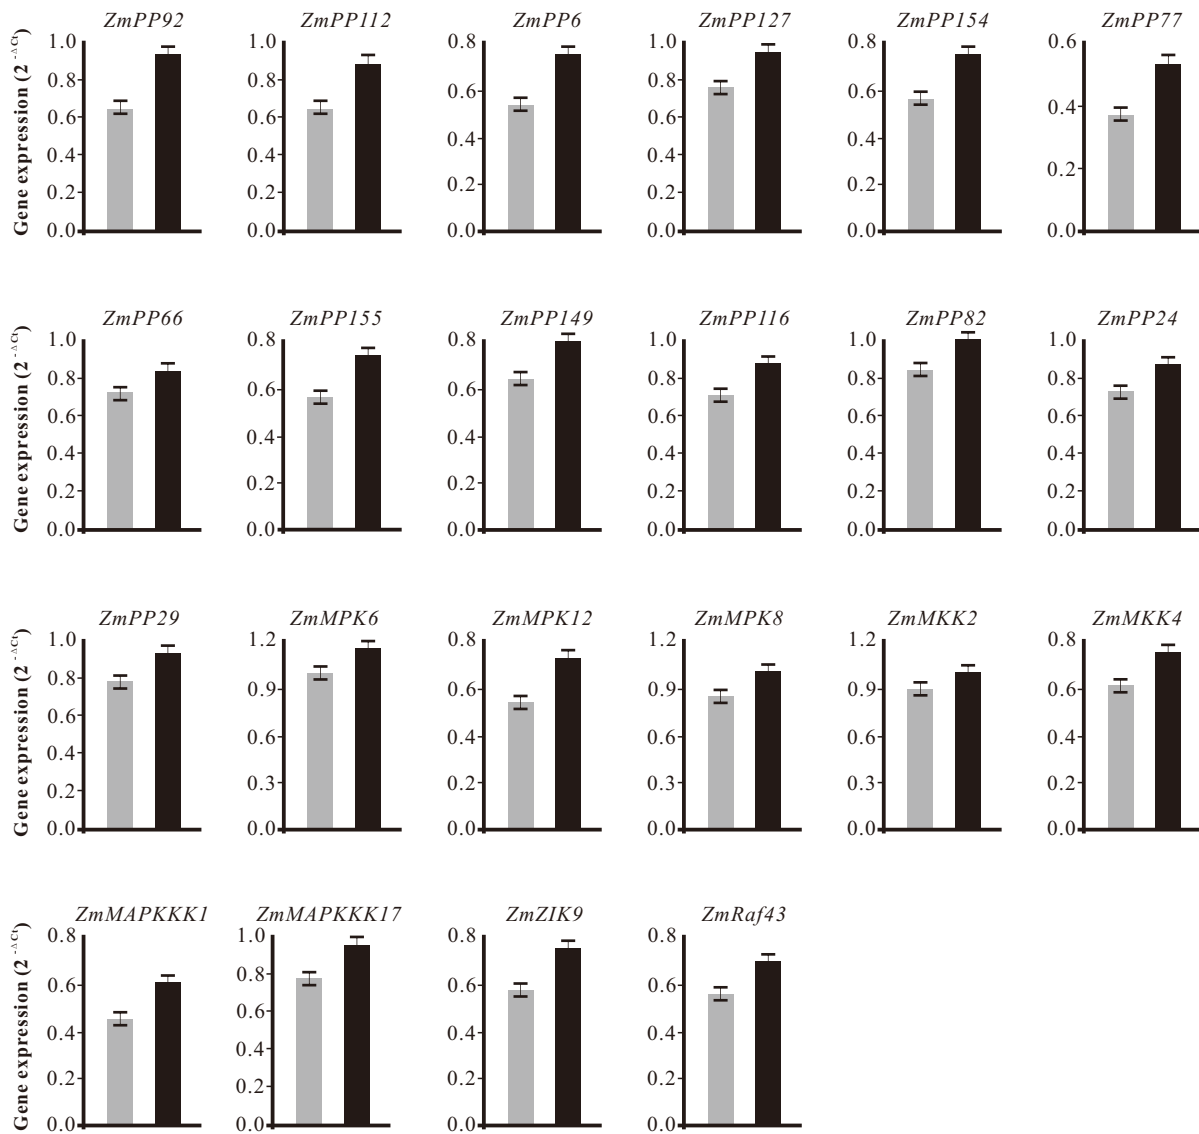

Supplement: 12864_2014_6458_MOESM10_ESM.pdf [file 12864_2014_6458_MOESM10_ESM.pdf]
