# Supplementary material for: Maize protein phosphatase gene family: identification and molecular characterization
Source: PubMed Central journal article supplement (PMC4169795; doi:10.1186/1471-2164-15-773), 2014-09-09
Supplement: 12864_2014_6458_MOESM11_ESM.pdf [file 12864_2014_6458_MOESM11_ESM.pdf]

**Table S1** List of primers used in this study.

| <b>real-time PCR</b> | <b>Forward</b>                 | <b>Reverse</b>                  |
|----------------------|--------------------------------|---------------------------------|
| CO                   | 5'-AGAACAACAGGGCACGAC-3'       | 5'-GTAGAATTGGAACCTCGCTGATG-3'   |
| FT                   | 5'-CCCTGCTACAACCTGGAACAACCT-3' | 5'-CATCACCGTTTCGTTACTCGTATCA-3' |
| UBQ1                 | 5'-TCCAGGAAATGACAGGCCAT-3'     | 5'-GAGCACATGGGCAAGATCAG-3'      |
| ACTIN7               | 5'-TCTGGCCTCTCTCAGTACCT-3'     | 5'-CTTCATGTGGACGATGCCTG-3'      |
| ACTIN8               | 5'-TCAGCACTTTCCAGCAGATG-3'     | 5'-CTGTGGACAATGCCTGGAC-3'       |
| ZmPLC                | 5'-TGAGTTGCCAGACCAAGGAA-3'     | 5'-CAAAGAAAGCCGCCTGACTT-3'      |
| ZmPIP2-5             | 5'-GCTCGTCTACACCGTCTTCT-3'     | 5'-CACCCAGAAGATCCAGTGGT-3'      |
| ZmSOS1               | 5'-GGGTTCTGGTTGCTGAAAGG-3'     | 5'-TGGCTTCCACCTGATACCTG-3'      |
| ZmSOS2               | 5'-ATGAAGGTGCTCGACAAGGA-3'     | 5'-TCCTGGCTTCATTCTCACGT-3'      |
| ZmA6                 | 5'-CACCAACATGTACCCCTCCT-3'     | 5'-CTTCCTCTCCTGCAGCTTCT-3'      |
| ZmNAC070.1           | 5'-GCTCAACTACTACCTCCGCA-3'     | 5'-CGTTGTAGATGGCCTTGTCG-3'      |
| ZmMYC8               | 5'-GGTAGAGATCGACGCCAAGA-3'     | 5'-CTGCTGGATCATGAGTCCCT-3'      |
| ZmMYB005             | 5'-GACAGTACCTCCAGAGCCTG-3'     | 5'-CTGTCCAACATCGCCATCAC-3'      |
| VP14                 | 5'-ACTTCTACTTCAGGCCCGAC-3'     | 5'-TCTTCTCCTTGCCAGCAC-3'        |
| ZmRbohO              | 5'-TTCCCATCCTTCTCTACGCC-3'     | 5'-GTAGATGTACTGCCCGCTCT-3'      |
| ZmPP53               | 5'-CACAACCTTCTTCGGCGTCTT-3'    | 5'-AGAAGCTCCTCTCCATCACG-3'      |
| ZmPP132              | 5'-CGAGATGGAGGACACGGTC-3'      | 5'-CAATCTGCCTTCCTGTGCTC-3'      |
| ZmWRKY92.1           | 5'-GACGACGTCCTTACCTTCCT-3'     | 5'-GCCCTCTCCACCTTCTTCTT-3'      |
| ZmbZIP23             | 5'-GGAGTGGAGAAAGTGGTGA-3'      | 5'-TCTGCCTGTTTCTCTCCAG-3'       |
| ZmSnRK2.7            | 5'-GAGAATGTCCAGCGCAAAT-3'      | 5'-GGAAGAAGTAGCGAGCCTCA-3'      |
| ZmRaf46              | 5'-TACTACCTCCAGCTGTCCCT-3'     | 5'-GGATGTTGTAGAACCCGTGC-3'      |
| ZmPP1                | 5'-AACGAAACCGAATGCTGACG-3'     | 5'-CATCCCGTACTGTTCCAAG-3'       |
| ZmPP54               | 5'-GGCTGTACGAACACAACAGG-3'     | 5'-ACACCGCATCTTTCCTGGTA-3'      |
| ZmPP59               | 5'-GGGTTTATGTCCACTGCACC-3'     | 5'-AACTTCTCTCCAGTCTGC-3'        |
| ZmPP67               | 5'-CTTGACGTGAGAAACCAGCC-3'     | 5'-TCGAACAGCTCCATGAACCT-3'      |
| ZmPP125              | 5'-CGGATTCAAGTGTGAGCTCG-3'     | 5'-GTGTGAAGCCTCCTCTCCTT-3'      |
| ZmPP133              | 5'-CCCAAGAAACCAACCTCTGC-3'     | 5'-TCGAACAGCTCCATGAACCT-3'      |
| ZmPP101              | 5'-TCGAGAAGAACGGGATCAGG-3'     | 5'-TTCGGTGCTTGCCTCTCTTA-3'      |
| ZmPP68               | 5'-CTAGCCACCGGTATTGTTGC-3'     | 5'-TCAAGAGAAACGGCCATCCT-3'      |
| ZmPP8                | 5'-GGGAAGGAGAAGGGTGGAAA-3'     | 5'-TTCGATCTCTCCGCCGTTTA-3'      |
| ZmPP112              | 5'-GAGGAGCACAGCGTCATTG-3'      | 5'-ACACGTACGGCTTCAGGTAT-3'      |
| ZmPP76               | 5'-AATCAAGGAGGAGGTGGTCG-3'     | 5'-GTCGTCGCCTGATTTCTCAC-3'      |
| ZmPP49               | 5'-GCATTATCCTCAGAAGCCGC-3'     | 5'-AGACTTCAGCTTGCTCGTCT-3'      |
| ZmPP138              | 5'-GGATGAAATGATGCGGGGTC-3'     | 5'-ACACATGCTGTACTCCACA-3'       |
| ZmPP82               | 5'-CAGTTGATGTGAGTGGTGGC-3'     | 5'-AAAGCCGAACCTCAGCTCTCT-3'     |
| ZmPP17               | 5'-GGCAGTGCAAATGTCTGGAA-3'     | 5'-CCCAGCCACATCTATCGTCT-3'      |
| ZmPP65               | 5'-TGCATGGTGGTCTATCTCCG-3'     | 5'-CACGATCATTGATGGCCAG-3'       |
| ZmPP79               | 5'-ACTGCATTGGTTCGAGTCAGA-3'    | 5'-AGGAGAAATACCCAGCCAC-3'       |
| ZmPP154              | 5'-CTCCGACCACAAGCCAAATC-3'     | 5'-ATGTCGTTGCTGATCACGTC-3'      |
| ZmPP29               | 5'-TCCCCTTAGATGTTGGCCAG-3'     | 5'-AAAGCATCCCAAACACCGTC-3'      |
| ZmPP113              | 5'-TTTTGCACCCTCCAGTTGTG-3'     | 5'-GCACATGTGACCAAAGACGT-3'      |
| ZmPP146              | 5'-CGGCTAGAGGAGAATGCAGA-3'     | 5'-GGTACAATGAACTCGCCGAC-3'      |
| ZmPP7                | 5'-GAACAGCAATGTGGAGTGGG-3'     | 5'-AAGCCTTTGAGCTCGTTGTG-3'      |
| ZmPP105              | 5'-AGGTGACGCAGAAGAGGATC-3'     | 5'-ATATGTACCGCCTCGTCGTT-3'      |
| ZmPP40               | 5'-GTCTCGTGTCTTCTCGTGTCC-3'    | 5'-AACCCGTACGTCACCTTCC-3'       |
| ZmPP92               | 5'-GGCGGGAATTTGCTCTTGAT-3'     | 5'-GATCGTGGATTGCTGTGGAC-3'      |
| ZmPP6                | 5'-GAGAAGAGCTACGCGAGGAT-3'     | 5'-TTGTGGTTCAGCTGAGAGAGG-3'     |
| ZmPP127              | 5'-GAGCCCTTAGAGCTGTGAT-3'      | 5'-GGGGAAAAGGTCATTCTGCC-3'      |
| ZmPP77               | 5'-ATGTTTCATCGCAACAACCC-3'     | 5'-CAGATCCTGCCCTCCAAAGA-3'      |
| ZmPP66               | 5'-CAACTTCGTCCCGTTCATCC-3'     | 5'-GTTATGGCCATCGAACACCC-3'      |
| ZmPP155              | 5'-GACTCGTTCTCCACCTCACA-3'     | 5'-CTATCCTCTCCAGCAGCTCC-3'      |
| ZmPP149              | 5'-CTTCATCATCTTCGCGTCGG-3'     | 5'-TCTCGATGGTCCGGATCTTG-3'      |
| ZmPP116              | 5'-CTTGCATCAGATGGGGTGTG-3'     | 5'-CTTCGTGAGGCTCATGTTG-3'       |
| ZmPP82               | 5'-CAGTTGATGTGAGTGGTGGC-3'     | 5'-AAAGCCGAACCTCAGCTCTCT-3'     |
| ZmPP24               | 5'-CGAACAAAGCAGGGATGGAC-3'     | 5'-GATGCGCTTTTGGTTTGGTG-3'      |

|                   |                                         |                                      |
|-------------------|-----------------------------------------|--------------------------------------|
| ZmPP29            | 5'-TCCCCTTAGATGTTGGCCAG-3'              | 5'-AAAGCATCCCAAACACCGTC-3'           |
| ZmMPK6            | 5'-TCAAGGTGATGTTGCAAGGC-3'              | 5'-TCTCACTCTTGCAGGTCTGG-3'           |
| ZmMPK12           | 5'-CCAAGGTTGAGAGAGAGCCA-3'              | 5'-ATCACAGGTCCGTTTCCACT-3'           |
| ZmMPK8            | 5'-CAACGCAAACCTGTGACCTGA-3'             | 5'-AATATGCACCCCACAGACCA-3'           |
| ZmMKK2            | 5'-GCGCGTTATACACCGAGATC-3'              | 5'-GATTCTTTCTGGCGCCATGT-3'           |
| ZmMKK4            | 5'-CCTCAGCATCCTCGAGTTCT-3'              | 5'-TCACCGGGTTCTTCTGTAGG-3'           |
| ZmMAPKKK1         | 5'-ATCATGGCGACGGGTTAGAA-3'              | 5'-GCCTACCTTTGCTAACGTCG-3'           |
| ZmMAPKKK17        | 5'-CCTAGTTGATGCAAGCGGAC-3'              | 5'-TGTGCAGCCAAGACTCCATA-3'           |
| ZmZIK9            | 5'-CTCAACTGCAGCAACGTCTT-3'              | 5'-GCCGTACGAGTAGATGTCCA-3'           |
| ZmRaf43           | 5'-TGATAGCACCCAGGAAAGCA-3'              | 5'-ATCCGAGCCATACCACTGAG-3'           |
| <b>PCR primer</b> | <b>Forward</b>                          | <b>Reverse</b>                       |
| FPTP1             | 5'-GCGGATCCAATGGGCAACGGTATGG-3'         | 5'-ATCCATGGGCTTCATCTCTGAATTGGGA-3'   |
| ZEP               | 5'-ATTTGACGGTTGGTGCGACA-3'              | 5'-CTCTCATTCTTCCTCGTCGATTT-3'        |
| NCED3             | 5'-CAACGGAGCTAACCCACTTCA-3'             | 5'-ACCCTATCACGACGACTTCATCT-3'        |
| SDR1              | 5'-AGGGATAGGTGAGAGCATTGTTC-3'           | 5'-CGCTACATCATCAACCGTCAGT-3'         |
| AAO3              | 5'-GCTTCCTGGCATTGGTTCTTAT-3'            | 5'-TCTTTCGCTCAGCTTCTTCC-3'           |
| ABA3              | 5'-ACCAGTGACCTTATAGCGGATGC-3'           | 5'-CGTTGGGCCTGATTTATGTGAA-3'         |
| ACT2              | 5'-CTTCCCTCAGCACATTCCAG-3'              | 5'-CCCAGCTTTTTAAGCCTTTG-3'           |
| ZmPP1             | 5'-CTCGAGATGAACTGCCTCCAGAACCTGCTCAAG-3' | 5'-GGTACCTTGCGCTCGGCGGCATCCGCGTAC-3' |
