# Supplementary material for: Maize protein phosphatase gene family: identification and molecular characterization
Source: PubMed Central journal article supplement (PMC4169795; doi:10.1186/1471-2164-15-773), 2014-09-09
Supplement: 12864_2014_6458_MOESM12_ESM.pdf [file 12864_2014_6458_MOESM12_ESM.pdf]

**Table S2.** The identified maize protein phosphatases and their related information.<sup>1</sup>Isoelectric Point of ZmPPs.<sup>2</sup>Molecular Weight of ZmPPs.<sup>3</sup>Predicted subcellular localization of ZmPPs. "nuclear", "cytosol", "chloroplast", "mitochondrion", "cytoskeleton", "Vacuolar membrane", "plastid", and "endoplasmic reticulum" are represented as "nucl", "cyto", "chlo", "mito", "cysk", "vacu", "plas" and "E.R.", respectively.

| Name                 | Gene ID          | Protein ID        | Group | Chr. | W/C | Locus                | No. introns in ORF | Full length | Position of catalytic domain | pI <sup>1</sup> | Mw <sup>2</sup> | At Ortholog                | Rice Ortholog               | Subcellular location <sup>3</sup> |
|----------------------|------------------|-------------------|-------|------|-----|----------------------|--------------------|-------------|------------------------------|-----------------|-----------------|----------------------------|-----------------------------|-----------------------------------|
| <b>PP2C</b>          |                  |                   |       |      |     |                      |                    |             |                              |                 |                 |                            |                             |                                   |
| ZmPP6                | GRMZM2G010855    | GRMZM2G010855_P01 | A     | 1    | W   | 39139491..39141597   | 2                  | 396         | 33-329                       | 6.06            | 42032.99        | AT1G07430.1 <sup>[1]</sup> | Os03g16170.1                | nucl                              |
| ZmPP31               | GRMZM2G019819    | GRMZM2G019819_P01 | A     | 2    | C   | 103045720..103049593 | 3                  | 452         | 127-449                      | 5.63            | 48351.51        | AT2G29380.1                | Os05g38290.2                | nucl                              |
| ZmPP39               | GRMZM2G082487    | GRMZM2G082487_P01 | A     | 2    | W   | 175540392..175541806 | 0                  | 350         | 81-346                       | 6.34            | 36961.56        | AT1G07430.1                | Os09g15670.1                | nucl                              |
| ZmPP53               | GRMZM2G059453    | GRMZM2G059453_P01 | A     | 3    | W   | 180041545..180043505 | 3                  | 408         | 105-405                      | 5.74            | 43279.76        | AT1G07430.1                | Os01g62760.1                | nucl                              |
| ZmPP56               | GRMZM2G122228    | GRMZM2G122228_P01 | A     | 3    | W   | 212832371..212838370 | 2                  | 410         | 121-397                      | 5.81            | 43434.87        | AT2G29380.1                | Os01g46760.1                | nucl                              |
| ZmPP57               | GRMZM2G134628    | GRMZM2G134628_P01 | A     | 3    | C   | 220844236..220850001 | 3                  | 484         | 160-475                      | 4.74            | 50696.61        | AT1G17550.1                | Os01g40094.1                | cyto                              |
| ZmPP107              | GRMZM2G177386    | GRMZM2G177386_P02 | A     | 6    | W   | 161548061..161551449 | 3                  | 370         | 54-361                       | 5.26            | 39716.06        | AT1G72770.3                | Os05g46040.1                | cyto                              |
| ZmPP108              | GRMZM2G102255    | GRMZM2G102255_P01 | A     | 6    | C   | 167404554..167407544 | 3                  | 459         | 148-450                      | 5.42            | 49072.28        | AT1G17550.1                | Os05g51510.1                | chlo                              |
| ZmPP112              | GRMZM2G308615    | GRMZM2G308615_P01 | A     | 7    | W   | 89034033..89035626   | 0                  | 358         | 81-354                       | 6.38            | 37599.2         | AT2G29380.1                | Os09g15670.1 <sup>[2]</sup> | nucl                              |
| ZmPP121              | GRMZM5G818101    | GRMZM5G818101_P02 | A     | 8    | W   | 72623215..72625583   | 2                  | 375         | 87-365                       | 7.02            | 39966.71        | AT2G29380.1                | Os05g49730.1                | nucl                              |
| ZmPP123              | GRMZM2G383807    | GRMZM2G383807_P01 | A     | 8    | C   | 77983607..77986678   | 3                  | 423         | 112-414                      | 5.02            | 44895.58        | AT1G17550.1                | Os05g51510.1                | chlo                              |
| ZmPP127              | GRMZM2G001243    | GRMZM2G001243_P01 | A     | 8    | C   | 136017188..136018955 | 2                  | 282         | 24-245                       | 5.36            | 30202.34        | AT1G72770.2                | Os05g46040.2                | cyto                              |
| ZmPP130              | GRMZM2G300125    | GRMZM2G300125_P01 | A     | 8    | C   | 147912922..147918179 | 2                  | 394         | 109-379                      | 6.19            | 41708.93        | AT2G29380.1                | Os01g46760.1                | cyto                              |
| ZmPP132              | GRMZM2G166297    | GRMZM2G166297_P01 | A     | 8    | W   | 168479978..168481963 | 3                  | 413         | 113-410                      | 6.34            | 43820.41        | AT1G07430.1                | Os01g62760.1                | nucl                              |
| ZmPP134              | GRMZM2G149132    | GRMZM2G149132_P01 | A     | 9    | C   | 14014949..14019990   | 3                  | 354         | 64-320                       | 5.05            | 39029.13        | AT2G25620.1                | Os06g08140.1                | cyto                              |
| ZmPP154              | GRMZM2G159811    | GRMZM2G159811_P01 | A     | 10   | C   | 101360842..101366143 | 3                  | 464         | 143-461                      | 5.39            | 48826.87        | AT2G29380.1                | Os03g16170.1                | nucl                              |
| ZmPP8 <sup>[3]</sup> | AC208201.3_FG002 | AC208201.3_FGP002 | B     | 1    | C   | 45366147..45367585   | 2                  | 388         | 141-383                      | 5.97            | 40789.15        | AT1G07160.1                | Os03g18150.1                | chlo                              |
| ZmPP43               | GRMZM2G342197    | GRMZM2G342197_P01 | B     | 2    | C   | 219328554..219330884 | 2                  | 429         | 174-425                      | 6.96            | 44565.81        | AT1G07160.1                | Os11g13820.1                | chlo                              |
| ZmPP60               | GRMZM2G407605    | GRMZM2G407605_P01 | B     | 4    | C   | 10795891..10798358   | 2                  | 436         | 184-429                      | 6.27            | 45449.71        | AT2G30020.1                | Os11g13820.1                | chlo                              |
| ZmPP61               | GRMZM2G407623    | GRMZM2G407623_P01 | B     | 4    | C   | 10803889..10808446   | 3                  | 465         | 178-461                      | 6.28            | 48770.04        | AT2G40180.1                | Os12g09640.1                | chlo                              |
| ZmPP97               | GRMZM2G000603    | GRMZM2G000603_P01 | B     | 6    | C   | 16792554..16799019   | 3                  | 431         | 156-428                      | 7.12            | 45113.36        | AT2G30020.1                | Os12g09640.1                | chlo                              |
| ZmPP147              | GRMZM2G465287    | GRMZM2G465287_P01 | B     | 9    | W   | 137595003..137596967 | 2                  | 421         | 173-416                      | 7.04            | 44750.78        | AT2G30020.1                | Os03g18150.1                | chlo                              |
| ZmPP7                | GRMZM2G112925    | GRMZM2G112925_P01 | C     | 1    | C   | 40511639..40514803   | 3                  | 665         | 239-585                      | 6.43            | 72070.41        | AT1G07630.1                | Os03g16760.1                | nucl                              |
| ZmPP24               | GRMZM2G093776    | GRMZM2G093776_P01 | C     | 1    | W   | 293454216..293458523 | 5                  | 669         | 227-607                      | 6.24            | 72213.6         | AT2G28890.1                | Os03g60650.1                | chlo                              |
| ZmPP30               | GRMZM2G016749    | GRMZM2G016749_P01 | C     | 2    | C   | 60629665..60634125   | 2                  | 521         | 172-509                      | 4.86            | 57469.74        | AT3G16560.1                | Os04g33080.3                | chlo                              |
| ZmPP77               | GRMZM2G144109    | GRMZM2G144109_P01 | C     | 5    | C   | 2315004..2318785     | 3                  | 632         | 236-624                      | 5.41            | 68202.56        | AT1G07630.1                | Os03g60650.1 <sup>[4]</sup> | chlo                              |
| ZmPP126              | GRMZM2G141859    | GRMZM2G141859_P01 | C     | 8    | W   | 133946985..133949080 | 2                  | 550         | 181-536                      | 5.93            | 59087.08        | AT2G28890.1                | Os05g02110.1                | chlo                              |
| ZmPP148              | GRMZM2G103247    | GRMZM2G103247_P01 | C     | 9    | W   | 139705351..139707757 | 3                  | 614         | 234-606                      | 5.86            | 66121.83        | AT2G28890.1                | Os03g16760.1                | cyto                              |
| ZmPP155              | GRMZM2G443509    | GRMZM2G443509_P01 | C     | 10   | W   | 113162222..113169068 | 3                  | 616         | 172-509                      | 5.25            | 68088.38        | AT3G16560.1                | Os04g33080.3                | chlo                              |
| ZmPP2                | AC155624.2_FG006 | AC155624.2_FGP006 | D     | 1    | C   | 8264824..8269232     | 3                  | 357         | 57-357                       | 7.25            | 39941.37        | AT3G51370.1                | Os03g04430.1                | nucl                              |
| ZmPP3                | GRMZM5G833774    | GRMZM5G833774_P01 | D     | 1    | W   | 8271537..8275361     | 3                  | 399         | 57-357                       | 8.49            | 44151.12        | AT3G51370.1                | Os03g04430.1                | nucl                              |
| ZmPP4                | GRMZM5G891266    | GRMZM5G891266_P01 | D     | 1    | C   | 8283445..8289244     | 3                  | 399         | 57-362                       | 8.69            | 44060.99        | AT3G51370.1                | Os03g04430.1                | nucl                              |
| ZmPP21               | GRMZM2G050512    | GRMZM2G050512_P01 | D     | 1    | W   | 279119397..279122777 | 3                  | 376         | 44-338                       | 9.39            | 41018.53        | AT4G33920.1                | Os03g55320.1                | chlo                              |
| ZmPP25               | GRMZM2G156543    | GRMZM2G156543_P01 | D     | 1    | W   | 295487761..295492645 | 3                  | 379         | 64-357                       | 6.36            | 41043.52        | AT3G17090.1                | Os03g61690.1                | cyto                              |
| ZmPP28               | GRMZM2G479665    | GRMZM2G479665_P01 | D     | 2    | C   | 14613507..14616809   | 3                  | 392         | 64-355                       | 6.18            | 43680.29        | AT5G06750.3                | Os04g49490.2                | cyto                              |

|                        |               |                   |    |    |   |                      |    |     |         |      |          |             |              |      |
|------------------------|---------------|-------------------|----|----|---|----------------------|----|-----|---------|------|----------|-------------|--------------|------|
| ZmPP80                 | GRMZM2G377904 | GRMZM2G377904_P01 | D  | 5  | C | 6436446..6439210     | 3  | 367 | 45-337  | 9.44 | 40083.56 | AT4G33920.1 | Os03g55320.1 | chlo |
| ZmPP83                 | GRMZM2G069970 | GRMZM2G069970_P01 | D  | 5  | W | 61837656..61842314   | 3  | 394 | 56-356  | 8.94 | 43795.1  | AT3G51370.1 | Os06g50380.2 | mito |
| ZmPP92                 | GRMZM2G057907 | GRMZM2G057907_P01 | D  | 5  | W | 197686662..197689690 | 3  | 387 | 61-352  | 8.87 | 43102    | AT5G06750.3 | Os02g46080.2 | mito |
| ZmPP99                 | GRMZM2G151254 | GRMZM2G151254_P01 | D  | 6  | C | 83605222..83611396   | 3  | 390 | 56-356  | 9.03 | 43143.32 | AT3G51370.1 | Os06g50380.2 | chlo |
| ZmPP144                | GRMZM2G108309 | GRMZM2G108309_P01 | D  | 9  | C | 126336491..126340954 | 3  | 398 | 57-357  | 8.51 | 44107.02 | AT4G38520.2 | Os10g39780.1 | chlo |
| ZmPP149                | GRMZM2G130943 | GRMZM2G130943_P02 | D  | 9  | W | 147545345..147547482 | 1  | 391 | 53-348  | 8.03 | 42142.89 | AT4G33920.1 | Os03g10950.1 | cyto |
| ZmPP151                | GRMZM2G010017 | GRMZM2G010017_P01 | D  | 9  | C | 151815439..151819668 | 3  | 399 | 57-357  | 8.69 | 44145.05 | AT4G38520.2 | Os03g04430.1 | chlo |
| ZmPP12                 | GRMZM2G170299 | GRMZM2G170299_P01 | E  | 1  | W | 184118323..184123276 | 4  | 515 | 49-381  | 5.27 | 55043.58 | AT1G16220.1 | Os08g39100.1 | nucl |
| ZmPP35                 | GRMZM2G153675 | GRMZM2G153675_P01 | E  | 2  | W | 152500883..152503674 | 4  | 473 | 71-381  | 5.17 | 51015    | AT1G79630.2 | Os11g01790.1 | cyto |
| ZmPP41                 | GRMZM2G021610 | GRMZM2G021610_P01 | E  | 2  | W | 205787043..205799282 | 4  | 432 | 67-330  | 5.54 | 46245.04 | AT4G03415.2 | Os07g37890.1 | chlo |
| ZmPP63                 | GRMZM2G120246 | GRMZM2G120246_P01 | E  | 4  | C | 99604469..99618606   | 4  | 458 | 99-381  | 6.24 | 49964.5  | AT3G02750.2 | Os11g22404.1 | nucl |
| ZmPP69                 | GRMZM2G071196 | GRMZM2G071196_P01 | E  | 4  | W | 198325575..198329863 | 4  | 523 | 47-384  | 5.12 | 56366.12 | AT1G16220.1 | Os08g39100.1 | chlo |
| ZmPP70                 | GRMZM2G067910 | GRMZM2G067910_P01 | E  | 4  | C | 218666642..218680650 | 4  | 500 | 68-453  | 8.04 | 53199.1  | AT3G02750.2 | Os02g27220.1 | chlo |
| ZmPP71                 | GRMZM2G053722 | GRMZM2G053722_P01 | E  | 4  | W | 221295031..221301313 | 10 | 813 | 115-396 | 5.03 | 90157.14 | AT2G20050.1 | Os02g17970.2 | nucl |
| ZmPP74                 | GRMZM2G040452 | GRMZM2G040452_P03 | E  | 4  | W | 229537254..229540046 | 2  | 385 | 76-365  | 6.32 | 40996.28 | AT5G26010.1 | Os02g13100.1 | chlo |
| ZmPP87                 | GRMZM2G119623 | GRMZM2G119623_P01 | E  | 5  | W | 153945630..153948183 | 2  | 377 | 70-358  | 5.25 | 40599.54 | AT5G36250.1 | Os02g13100.1 | chlo |
| ZmPP89                 | GRMZM2G102560 | GRMZM2G102560_P02 | E  | 5  | W | 159957620..159962813 | 4  | 526 | 149-455 | 6.65 | 55797.08 | AT3G02750.2 | Os02g27220.1 | chlo |
| ZmPP105                | GRMZM2G069713 | GRMZM2G069713_P01 | E  | 6  | C | 138870557..138873663 | 2  | 380 | 50-336  | 9.09 | 41413.8  | AT3G05640.2 | Os05g29030.1 | chlo |
| ZmPP116                | GRMZM2G107565 | GRMZM2G107565_P01 | E  | 7  | W | 158156507..158160970 | 4  | 431 | 77-335  | 5.72 | 46356.2  | AT1G03590.1 | Os07g37890.1 | chlo |
| ZmPP117                | GRMZM2G161544 | GRMZM2G161544_P01 | E  | 7  | W | 170365708..170370184 | 10 | 352 | 67-332  | 5    | 37237.76 | AT3G06270.1 | Os07g45170.1 | cyto |
| ZmPP128                | GRMZM2G136765 | GRMZM2G136765_P01 | E  | 8  | C | 138556689..138562724 | 4  | 473 | 133-436 | 8.9  | 50377.87 | AT1G16220.1 | Os02g27220.1 | chlo |
| ZmPP27                 | GRMZM2G111232 | GRMZM2G111232_P01 | F1 | 2  | C | 11050697..11054729   | 4  | 315 | 75-314  | 8.72 | 34151.75 | AT4G28400.1 | Os04g52000.1 | chlo |
| ZmPP40                 | GRMZM2G311187 | GRMZM2G311187_P01 | F1 | 2  | W | 203085227..203086469 | 3  | 325 | 73-325  | 6.28 | 35363.59 | AT3G15260.2 | Os07g32380.1 | mito |
| ZmPP115                | GRMZM2G010298 | GRMZM2G010298_P01 | F1 | 7  | W | 151508928..151519024 | 4  | 290 | 49-389  | 6.27 | 31734.98 | AT3G15260.2 | Os07g32380.1 | cyto |
| ZmPP152                | GRMZM2G074489 | GRMZM2G074489_P02 | F1 | 10 | W | 65474354..65488822   | 3  | 336 | 85-312  | 5.94 | 36524.49 | AT4G28400.1 | Os04g52000.1 | chlo |
| ZmPP158                | GRMZM2G155991 | GRMZM2G155991_P01 | F1 | 10 | W | 141619078..141623273 | 4  | 318 | 78-317  | 8.73 | 34552.13 | AT4G28400.1 | Os04g52000.1 | chlo |
| ZmPP159 <sup>[5]</sup> | GRMZM2G180471 | GRMZM2G180471_P01 | F1 | 10 | W | 143662996..143675455 | 4  | 284 | 46-283  | 5.83 | 31193.5  | AT1G34750.1 | Os04g37904.1 | cyto |
| ZmPP26                 | GRMZM2G056572 | GRMZM2G056572_P02 | F2 | 2  | C | 3969379..3973803     | 7  | 284 | 39-375  | 4.7  | 30659.07 | AT4G31750.1 | Os04g56450.1 | cyto |
| ZmPP72                 | GRMZM2G073788 | GRMZM2G073788_P01 | F2 | 4  | C | 225064123..225073527 | 7  | 357 | 115-352 | 5.7  | 38543.2  | AT4G31750.1 | Os02g05630.1 | chlo |
| ZmPP76 <sup>[6]</sup>  | GRMZM2G166035 | GRMZM2G166035_P01 | F2 | 4  | W | 237508371..237511930 | 7  | 290 | 33-270  | 4.76 | 31207.52 | AT4G31750.1 | Os02g05630.2 | cysk |
| ZmPP84                 | GRMZM5G829894 | GRMZM5G829894_P01 | F2 | 5  | C | 80387639..80389787   | 6  | 255 | 1-235   | 4.7  | 27749.93 | AT5G53140.1 | Os02g15594.1 | cyto |
| ZmPP86                 | GRMZM2G442404 | GRMZM2G442404_P01 | F2 | 5  | W | 141575880..141581134 | 7  | 365 | 123-360 | 5.79 | 39295.97 | AT5G53140.1 | Os02g15594.1 | chlo |
| ZmPP109                | GRMZM2G412937 | GRMZM2G412937_P01 | F2 | 6  | C | 168009624..168067650 | 6  | 499 | 245-482 | 4.77 | 54300.21 | AT5G53140.1 | Os05g50970.1 | cyto |
| ZmPP122                | GRMZM2G158818 | GRMZM2G158818_P01 | F2 | 8  | W | 76319202..76324406   | 5  | 208 | 36-192  | 5.02 | 22719.37 | AT5G53140.1 | Os05g50970.1 | cyto |
| ZmPP129                | GRMZM2G040642 | GRMZM2G040642_P01 | F2 | 8  | C | 144367294..144375321 | 7  | 367 | 115-352 | 6.38 | 39586.46 | AT5G53140.1 | Os05g50970.1 | chlo |
| ZmPP10                 | GRMZM2G057768 | GRMZM2G057768_P02 | G  | 1  | W | 84671696..84674989   | 3  | 375 | 89-341  | 6.07 | 40359.67 | AT2G33700.1 | Os10g39540.1 | nucl |
| ZmPP66                 | GRMZM2G108147 | GRMZM2G108147_P02 | G  | 4  | W | 173563703..173565614 | 2  | 245 | 24-245  | 5.18 | 26691.93 | AT2G25620.1 | Os02g55560.1 | cyto |
| ZmPP95                 | GRMZM2G180430 | GRMZM2G180430_P01 | G  | 5  | C | 214092148..214098979 | 2  | 357 | 66-322  | 5.28 | 39691.75 | AT2G25620.1 | Os02g55560.1 | chlo |
| ZmPP111                | GRMZM2G126832 | GRMZM2G126832_P02 | G  | 7  | W | 86047473..86062099   | 7  | 360 | 94-359  | 6.57 | 39023.96 | AT1G18030.1 | Os09g14540.1 | nucl |
| ZmPP137                | GRMZM2G158734 | GRMZM2G158734_P01 | G  | 9  | W | 87131326..87135073   | 3  | 360 | 70-325  | 5.09 | 39093.22 | AT2G25620.1 | Os06g39600.1 | cyto |
| ZmPP143                | GRMZM2G009163 | GRMZM2G009163_P01 | G  | 9  | C | 125898278..125902397 | 3  | 372 | 86-338  | 6.4  | 40291.82 | AT2G33700.1 | Os02g17970.2 | cyto |
| ZmPP153                | GRMZM2G060798 | GRMZM2G060798_P01 | G  | 10 | C | 85581746..85584681   | 3  | 405 | 98-360  | 4.82 | 44303.09 | AT3G62260.2 | Os05g04360.1 | chlo |
| ZmPP9                  | GRMZM2G077960 | GRMZM2G077960_P01 | H  | 1  | C | 68554980..68559182   | 7  | 438 | 40-304  | 5.43 | 47270.86 | AT1G47380.1 | Os03g27780.2 | chlo |
| ZmPP29                 | GRMZM2G015610 | GRMZM2G015610_P01 | H  | 2  | C | 44386603..44391746   | 8  | 444 | 48-303  | 5.8  | 47357.53 | AT1G47380.1 | Os04g37660.1 | mito |
| ZmPP42                 | GRMZM5G836628 | GRMZM5G836628_P02 | H  | 2  | C | 217972747..217978479 | 6  | 429 | 42-298  | 8.15 | 46098.7  | AT1G09160.1 | Os07g49040.1 | chlo |

|                        |                  |                   |      |    |   |                      |    |     |         |      |          |                            |                             |      |
|------------------------|------------------|-------------------|------|----|---|----------------------|----|-----|---------|------|----------|----------------------------|-----------------------------|------|
| ZmPP49                 | GRMZM2G173734    | GRMZM2G173734_P01 | H    | 3  | W | 75132287..75136332   | 7  | 433 | 93-355  | 7.61 | 46025.41 | AT1G68410.2 <sup>[7]</sup> | Os01g32964.1                | chlo |
| ZmPP64                 | GRMZM2G081359    | GRMZM2G081359_P03 | H    | 4  | W | 122320874..122345693 | 8  | 449 | 55-310  | 6.07 | 48214.45 | AT1G47380.1                | Os02g35910.1                | vacu |
| ZmPP90                 | GRMZM2G052699    | GRMZM2G052699_P01 | H    | 5  | W | 175461538..175465986 | 8  | 446 | 55-315  | 5.79 | 47985.08 | AT1G47380.1                | Os02g35910.1                | chlo |
| ZmPP113                | GRMZM2G135444    | GRMZM2G135444_P01 | H    | 7  | W | 126349583..126354736 | 8  | 431 | 38-295  | 6.06 | 47157.9  | AT1G47380.1                | Os09g28560.1                | chlo |
| ZmPP118                | GRMZM2G113016    | GRMZM2G113016_P01 | H    | 7  | C | 174530527..174534871 | 6  | 429 | 42-298  | 7.51 | 46024.57 | AT1G09160.1                | Os07g49040.1                | chlo |
| ZmPP141                | GRMZM2G150213    | GRMZM2G150213_P01 | H    | 9  | C | 121712179..121717046 | 8  | 446 | 40-310  | 5.38 | 47991.53 | AT1G47380.1                | Os03g27780.1                | chlo |
| ZmPP146                | GRMZM2G006429    | GRMZM2G006429_P01 | H    | 9  | C | 136552200..136555676 | 6  | 430 | 42-298  | 6.53 | 45911.18 | AT1G09160.1                | Os03g18970.1                | nucl |
| ZmPP156                | GRMZM2G044382    | GRMZM2G044382_P01 | H    | 10 | W | 120823846..120828918 | 8  | 443 | 47-302  | 5.8  | 47533.75 | AT1G47380.1                | Os04g37660.1                | chlo |
| ZmPP85                 | GRMZM2G360455    | GRMZM2G360455_P02 | I    | 5  | C | 91807061..91814398   | 9  | 359 | 33-330  | 5.22 | 39222.09 | AT4G31860.1                | Os02g08364.1                | nucl |
| ZmPP100                | GRMZM2G019812    | GRMZM2G019812_P01 | I    | 6  | W | 95635541..95648328   | 10 | 427 | 88-393  | 4.72 | 47144.22 | AT4G31860.1                | Os06g44210.1                | cyto |
| ZmPP114                | GRMZM2G006416    | GRMZM2G006416_P02 | I    | 7  | C | 145764674..145770422 | 10 | 363 | 33-329  | 4.96 | 39537.45 | AT4G31860.1                | Os09g38550.1                | chlo |
| ZmPP138 <sup>[8]</sup> | GRMZM2G047376    | GRMZM2G047376_P01 | I    | 9  | W | 104264956..104269979 | 10 | 366 | 33-330  | 4.7  | 40146.8  | AT4G31860.1                | Os06g44210.1                | cyto |
| ZmPP139                | GRMZM2G104076    | GRMZM2G104076_P02 | I    | 9  | W | 104360920..104365697 | 10 | 428 | 107-403 | 5.1  | 46781.87 | AT4G31860.1                | Os06g44210.1                | chlo |
| ZmPP157                | GRMZM2G109496    | GRMZM2G109496_P05 | I    | 10 | C | 128323406..128328677 | 9  | 365 | 31-319  | 6    | 39849.96 | AT4G31860.1                | Os04g42260.1                | cyto |
| ZmPP23                 | GRMZM2G134227    | GRMZM2G134227_P01 | K    | 1  | W | 291254272..291259644 | 3  | 466 | 234-461 | 8.74 | 49660.16 | AT4G16580.1                | Os03g59470.1                | chlo |
| ZmPP46                 | GRMZM2G003096    | GRMZM2G003096_P01 | K    | 3  | C | 14335790..14339102   | 11 | 356 | 83-318  | 5.25 | 38093.09 | AT2G30170.1                | Os01g07090.1                | chlo |
| ZmPP78                 | AC210013.4_FG011 | AC210013.4_FGP011 | K    | 5  | C | 3393450..3397191     | 3  | 468 | 239-466 | 8.4  | 49521.62 | AT4G16580.1                | Os03g59470.1                | chlo |
| ZmPP82                 | GRMZM2G071087    | GRMZM2G071087_P01 | K    | 5  | C | 38472076..38479696   | 8  | 565 | 330-557 | 4.46 | 58875.9  | AT4G33500.1                | Os10g22460.1 <sup>[9]</sup> | cyto |
| ZmPP91                 | GRMZM2G159904    | GRMZM2G159904_P01 | K    | 5  | W | 187808501..187809804 | 0  | 320 | 83-318  | 7.7  | 34329.01 | AT4G16580.1                | Os02g42270.1                | cyto |
| ZmPP142                | AC217887.3_FG001 | AC217887.3_FGP001 | K    | 9  | C | 122054370..122055332 | 0  | 322 | 82-320  | 6.01 | 34141.59 | AT4G16580.1                | Os02g42270.1                | cyto |
| ZmPP44                 | GRMZM2G053713    | GRMZM2G053713_P01 | KAPP | 2  | C | 226963057..227123377 | 9  | 741 | 12-316  | 6.26 | 84632.43 | AT3G63340.1                | Os11g37540.1                | cyto |
| ZmPP37                 | GRMZM2G150608    | GRMZM2G150608_P01 | Un   | 2  | W | 160781682..160789474 | 12 | 581 | 315-571 | 6.2  | 63708.75 | AT5G19280.1                | Os07g11010.1                | chlo |
| ZmPP58                 | GRMZM2G372297    | GRMZM2G372297_P01 | Un   | 3  | C | 226956068..226960039 | 10 | 383 | 63-342  | 5.43 | 41052.65 | AT4G27800.1                | Os01g37130.1                | chlo |
| ZmPP110                | GRMZM2G042627    | GRMZM2G042627_P01 | Un   | 7  | C | 19320389..19347469   | 12 | 583 | 313-571 | 7.03 | 63731.92 | AT5G19280.1                | Os07g11010.1                | vacu |

#### PTP

|                       |               |                   |            |   |   |                      |    |      |                |      |           |             |              |      |
|-----------------------|---------------|-------------------|------------|---|---|----------------------|----|------|----------------|------|-----------|-------------|--------------|------|
| ZmPP1 <sup>[10]</sup> | GRMZM2G052546 | GRMZM2G052546_P03 | DSP/ZmRIP1 | 1 | W | 2538102..2544683     | 13 | 373  | 111-227        | 5.77 | 41850.63  | AT3G52180.1 | Os03g01750.1 | chlo |
| ZmPP16                | GRMZM2G127374 | GRMZM2G127374_P01 | DSP        | 1 | W | 219567806..219574992 | 9  | 596  | 302-423        | 8.89 | 66120.27  | AT3G01510.1 | Os08g29160.1 | chlo |
| ZmPP18                | GRMZM2G146819 | GRMZM2G146819_P01 | DSP        | 1 | W | 246654816..246667719 | 13 | 1264 | 97-250,514-670 | 6.26 | 142388.08 | AT3G62010.1 | Os03g38970.1 | nucl |
| ZmPP20                | GRMZM2G003640 | GRMZM2G003640_P01 | DSP        | 1 | W | 256296778..256306481 | 5  | 197  | 46-172         | 7.63 | 21197.67  | AT3G23610.2 | Os01g29469.1 | nucl |
| ZmPP33                | GRMZM2G042897 | GRMZM2G042897_P02 | DSP        | 2 | W | 143672210..143674292 | 1  | 238  | 122-229        | 9.62 | 26580.32  | AT5G56610.1 | Os12g05660.3 | chlo |
| ZmPP34                | GRMZM2G173035 | GRMZM2G173035_P01 | DSP        | 2 | C | 148054055..148060611 | 5  | 354  | 91-184         | 5.65 | 39044.59  | AT4G18593.1 | Os11g04180.1 | cyto |
| ZmPP38                | GRMZM2G086418 | GRMZM2G086418_P01 | DSP        | 2 | W | 161951772..161962083 | 4  | 235  | 76-228         | 5.51 | 26431.25  | AT1G05000.1 | Os09g05020.1 | cyto |
| ZmPP45                | GRMZM2G132468 | GRMZM2G132468_P01 | DSP        | 2 | W | 235478100..235485711 | 11 | 652  | 277-306        | 5.72 | 70410.49  | AT3G19420.1 | Os12g21890.1 | nucl |
| ZmPP48                | GRMZM2G139892 | GRMZM2G139892_P02 | DSP        | 3 | C | 55801368..55808447   | 10 | 928  | 707-838        | 5.96 | 103067.26 | AT5G23720.1 | Os01g20940.1 | nucl |
| ZmPP52                | GRMZM2G060027 | GRMZM2G060027_P02 | DSP        | 3 | W | 176810128..176817038 | 1  | 256  | 123-232        | 8.46 | 28293.99  | AT5G56610.1 | Os01g64010.1 | plas |
| ZmPP54                | GRMZM2G051288 | GRMZM2G051288_P01 | DSP        | 3 | W | 199661246..199664915 | 5  | 340  | 92-209         | 5.34 | 37618.69  | AT2G35680.1 | Os01g53710.1 | cyto |
| ZmPP59                | GRMZM2G000660 | GRMZM2G000660_P01 | DSP        | 3 | C | 230742740..230746075 | 3  | 280  | 127-227        | 9.15 | 31420.87  | AT3G10940.1 | Os12g02120.2 | chlo |
| ZmPP62                | GRMZM2G030463 | GRMZM2G030463_P01 | DSP        | 4 | C | 12580010..12609706   | 16 | 683  | 133-262        | 6.24 | 80034.03  | AT3G09100.2 | Os11g11070.1 | nucl |
| ZmPP67                | GRMZM2G126765 | GRMZM2G126765_P01 | DSP        | 4 | C | 177642843..177645152 | 4  | 263  | 92-255         | 8.7  | 29310.63  | AT1G05000.1 | Os02g53160.1 | chlo |
| ZmPP68                | GRMZM2G031094 | GRMZM2G031094_P02 | DSP        | 4 | C | 188486869..188489292 | 1  | 238  | 122-229        | 9.67 | 26652.47  | AT5G56610.1 | Os12g05660.3 | plas |
| ZmPP93                | GRMZM2G045404 | GRMZM2G045404_P01 | DSP        | 5 | C | 203651899..203655593 | 4  | 269  | 57-179         | 7.08 | 30699.34  | AT2G04550.1 | Os02g48840.1 | nucl |
| ZmPP94                | GRMZM2G084086 | GRMZM2G084086_P01 | DSP        | 5 | W | 210752879..210755426 | 4  | 220  | 52-214         | 6.3  | 24358.91  | AT1G05000.1 | Os06g10650.1 | cyto |
| ZmPP101               | GRMZM2G134389 | GRMZM2G134389_P01 | DSP        | 6 | C | 109281527..109286136 | 4  | 213  | 55-207         | 8.4  | 24477.55  | AT1G05000.1 | Os06g10650.1 | cyto |
| ZmPP102               | GRMZM2G174170 | GRMZM2G174170_P02 | DSP        | 6 | W | 120851110..120857801 | 4  | 275  | 56-180         | 6.32 | 30627.39  | AT2G04550.1 | Os06g20340.1 | nucl |

|         |               |                   |       |   |   |                      |   |     |         |      |          |                             |              |      |
|---------|---------------|-------------------|-------|---|---|----------------------|---|-----|---------|------|----------|-----------------------------|--------------|------|
| ZmPP106 | GRMZM2G031435 | GRMZM2G031435_P01 | DSP   | 6 | C | 160119167..160123160 | 5 | 371 | 115-208 | 5.98 | 41585.3  | AT2G35680.1                 | Os05g44910.1 | cyto |
| ZmPP120 | GRMZM2G061684 | GRMZM2G061684_P01 | DSP   | 8 | W | 40383566..40388878   | 9 | 866 | 647-780 | 5.92 | 96721.05 | AT5G23720.1                 | Os01g24470.1 | nucl |
| ZmPP125 | GRMZM2G005350 | GRMZM2G005350_P01 | DSP   | 8 | C | 133181699..133186955 | 1 | 766 | 147-277 | 7.9  | 83316.91 | AT3G55270.1                 | Os05g02500.1 | nucl |
| ZmPP131 | GRMZM2G168087 | GRMZM2G168087_P01 | DSP   | 8 | C | 166800538..166804990 | 1 | 256 | 123-232 | 8.98 | 28273.96 | AT5G56610.1                 | Os01g64010.1 | plas |
| ZmPP133 | GRMZM2G070315 | GRMZM2G070315_P01 | DSP   | 9 | W | 8778312..8783014     | 4 | 216 | 58-210  | 8.84 | 24645.75 | AT1G05000.1                 | Os06g10650.1 | cyto |
| ZmPP140 | GRMZM2G119079 | GRMZM2G119079_P01 | DSP   | 9 | C | 115320787..115325491 | 5 | 347 | 123-222 | 6.1  | 38789.52 | AT2G35680.1                 | Os10g41240.1 | cyto |
| ZmPP51  | GRMZM2G010775 | GRMZM2G010775_P01 | PTP   | 3 | C | 140409749..140417545 | 7 | 351 | 109-340 | 7.26 | 39754.83 | AT1G71860.3 <sup>[11]</sup> | Os12g07590.1 | mito |
| ZmPP47  | GRMZM2G151087 | GRMZM2G151087_P02 | PTPL  | 3 | W | 17429943..17433359   | 8 | 221 | 55-218  | 9.8  | 25205.72 | AT5G10480.1                 | Os04g20280.1 | chlo |
| ZmPP14  | GRMZM2G319357 | GRMZM2G319357_P01 | LMWP  | 1 | W | 205241339..205247763 | 5 | 336 | 171-323 | 9.02 | 36055.96 | AT3G44620.1                 | Os08g44320.1 | nucl |
| ZmPP145 | GRMZM2G011520 | GRMZM2G011520_P01 | CDC25 | 9 | W | 126671626..126675008 | 2 | 131 | 10-112  | 7.65 | 14245.15 | AT5G03455.1                 | Os10g39860.2 | mito |

#### PP2A

|                        |               |                   |  |   |   |                      |    |     |         |      |           |             |                              |      |
|------------------------|---------------|-------------------|--|---|---|----------------------|----|-----|---------|------|-----------|-------------|------------------------------|------|
| ZmPP5                  | GRMZM2G160237 | GRMZM2G160237_P01 |  | 1 | C | 39043378..39051301   | 2  | 322 | 38-313  | 5.1  | 36260.52  | AT2G39840.1 | Os03g16110.1                 | cyto |
| ZmPP11                 | GRMZM2G028700 | GRMZM2G028700_P01 |  | 1 | W | 174634733..174645383 | 20 | 996 | 660-950 | 5.68 | 105657.03 | AT2G27210.1 | Os12g42310.1                 | cysk |
| ZmPP13                 | GRMZM2G004582 | GRMZM2G004582_P01 |  | 1 | C | 189474106..189481738 | 6  | 623 | 259-582 | 9.36 | 68793.08  | AT5G63870.1 | Os08g40200.1                 | chlo |
| ZmPP15                 | GRMZM2G470452 | GRMZM2G470452_P01 |  | 1 | W | 208732967..208734529 | 1  | 406 | 25-290  | 8.63 | 45634.58  | AT1G64040.1 | Os08g35440.1                 | cyto |
| ZmPP17                 | GRMZM2G382077 | GRMZM2G382077_P01 |  | 1 | W | 242151150..242169299 | 10 | 315 | 26-301  | 5.04 | 35811.51  | AT3G58500.1 | Os10g27050.1 <sup>[12]</sup> | cyto |
| ZmPP19                 | GRMZM2G070323 | GRMZM2G070323_P01 |  | 1 | C | 250428573..250443357 | 17 | 924 | 666-924 | 5.74 | 97595.07  | AT2G27210.1 | Os03g44500.1                 | cyto |
| ZmPP22                 | GRMZM2G062394 | GRMZM2G062394_P01 |  | 1 | C | 290103711..290108581 | 10 | 307 | 18-293  | 5.16 | 35205.81  | AT3G58500.1 | Os03g59060.1                 | cyto |
| ZmPP32                 | GRMZM2G039359 | GRMZM2G039359_P04 |  | 2 | C | 133469918..133475008 | 5  | 413 | 81-373  | 5.91 | 45336.93  | AT5G63870.1 | Os08g40200.1                 | E.R. |
| ZmPP36                 | GRMZM2G180691 | GRMZM2G180691_P01 |  | 2 | W | 153956036..153967953 | 5  | 307 | 16-292  | 5.33 | 34951.91  | AT5G55260.1 | Os09g11230.1                 | cyto |
| ZmPP50                 | GRMZM2G009593 | GRMZM2G009593_P01 |  | 3 | W | 87798819..87808953   | 20 | 998 | 663-952 | 5.65 | 105693.14 | AT2G27210.1 | Os12g42310.1                 | cysk |
| ZmPP55                 | GRMZM2G055905 | GRMZM2G055905_P01 |  | 3 | W | 206851721..206857487 | 9  | 303 | 13-289  | 5.08 | 34740.45  | AT3G19980.1 | Os01g49690.1                 | cyto |
| ZmPP65 <sup>[13]</sup> | GRMZM2G112240 | GRMZM2G112240_P01 |  | 4 | C | 170914968..170917894 | 2  | 316 | 24-299  | 5.27 | 35763.02  | AT2G39840.1 | Os02g57450.1                 | cyto |
| ZmPP73                 | GRMZM2G338631 | GRMZM2G338631_P01 |  | 4 | C | 228371898..228374204 | 0  | 177 | 1-177   | 5.81 | 20324.53  | AT5G59160.3 | Os02g57450.1                 | cyto |
| ZmPP75                 | GRMZM2G038195 | GRMZM2G038195_P01 |  | 4 | C | 230556470..230569433 | 3  | 306 | 17-292  | 4.89 | 35126.74  | AT1G10430.1 | Os06g37660.1                 | cyto |
| ZmPP79                 | GRMZM2G108355 | GRMZM2G108355_P01 |  | 5 | W | 3660187..3664632     | 10 | 307 | 18-393  | 5.16 | 35189.81  | AT3G58500.1 | Os03g59060.1 <sup>[12]</sup> | nucl |
| ZmPP81                 | GRMZM2G148539 | GRMZM2G148539_P02 |  | 5 | C | 16615450..16618165   | 7  | 421 | 62-351  | 5.43 | 47221.05  | AT2G27210.1 | Os03g44500.1                 | cyto |
| ZmPP88                 | GRMZM2G133464 | GRMZM2G133464_P01 |  | 5 | C | 156260125..156276652 | 5  | 306 | 17-292  | 4.83 | 35053.65  | AT1G10430.1 | Os02g12580.1                 | cyto |
| ZmPP96                 | GRMZM2G390076 | GRMZM2G390076_P02 |  | 5 | W | 216074554..216083395 | 2  | 317 | 25-300  | 5.26 | 35814.03  | AT2G39840.1 | Os02g57450.1                 | cyto |
| ZmPP98                 | GRMZM2G041822 | GRMZM2G041822_P01 |  | 6 | W | 78831860..78838998   | 2  | 324 | 24-299  | 5.41 | 36745.2   | AT1G64040.1 | Os06g06880.1                 | cyto |
| ZmPP103                | GRMZM5G899390 | GRMZM5G899390_P01 |  | 6 | C | 127199973..127203814 | 2  | 322 | 32-307  | 5.29 | 36296.83  | AT5G27840.1 | Os01g24750.1                 | cyto |
| ZmPP104                | GRMZM2G126435 | GRMZM2G126435_P01 |  | 6 | W | 131454814..131463174 | 11 | 483 | 196-466 | 5.72 | 54679.29  | AT2G42810.1 | Os05g11550.1                 | nucl |
| ZmPP119                | GRMZM2G120202 | GRMZM2G120202_P01 |  | 8 | C | 40152776..40157471   | 2  | 325 | 32-307  | 5.13 | 36581.01  | AT5G27840.1 | Os01g24750.1                 | cyto |
| ZmPP124                | GRMZM2G137286 | GRMZM2G137286_P02 |  | 8 | C | 83126356..83129282   | 2  | 335 | 32-307  | 5.59 | 37858.59  | AT5G27840.1 | Os01g24750.1                 | cyto |
| ZmPP135                | GRMZM2G016930 | GRMZM2G016930_P01 |  | 9 | C | 16491882..16497920   | 2  | 404 | 104-379 | 8.75 | 45362.73  | AT4G11240.1 | Os06g06880.1                 | chlo |
| ZmPP136                | GRMZM2G119546 | GRMZM2G119546_P01 |  | 9 | C | 81640174..81653751   | 5  | 306 | 17-292  | 4.83 | 35157.82  | AT1G10430.1 | Os06g37660.1                 | cyto |
| ZmPP150                | GRMZM2G420926 | GRMZM2G420926_P01 |  | 9 | C | 151473561..151480045 | 10 | 313 | 24-299  | 5.02 | 35624.24  | AT3G58500.1 | Os03g07150.1 <sup>[12]</sup> | cyto |

- [1] Kuhn, J.M., Boisson-Dernier, A., Dizon, M.B., Maktabi, M.H., and Schroeder, J.I. (2006). The protein phosphatase AtPP2CA negatively regulates abscisic acid signal transduction in Arabidopsis, and effects of abh1 on AtPP2CA mRNA. *Plant physiology* 140, 127-139.
- [2] Jiang, Y., Dong, J., Chen, R., Gao, X., and Xu, Z. (2011). Isolation of a novel PP2C gene from rice and its response to abiotic stresses. *African Journal of Biotechnology* 10, 7143-7154
- [3] Fu, H., Feng, L., Li, N., Liang, H., and Wan, C. (2009). Differential Expression of Serine/Threonine Protein Phosphatase Type-2C Under Drought Stress in Maize. *Plant Mol Biol Rep* 27, 29-37
- [4] Park, C.J., Peng, Y., Chen, X., Dardick, C., Ruan, D., Bart, R., Canlas, P.E., and Ronald, P.C. (2008). Rice XB15, a protein phosphatase 2C, negatively regulates cell death and XA21-mediated innate immunity. *PLoS biology* 6, e231.

- [5] Hu, X., Liu, L., Xiao, B., Li, D., Xing, X., and Kong, X. (2010). Enhanced tolerance to low temperature in tobacco by over-expression of a new maize protein phosphatase 2C, ZmPP2C2. *Journal of plant physiology* 167, 1307-1315.
- [6] Liu, L., Hu, X., Song, J., Zong, X., and Li, D. (2009). Over-expression of a *Zea mays* L. protein phosphatase 2C gene (ZmPP2C) in *Arabidopsis thaliana* decreases tolerance to salt and drought. *Journal of plant physiology* 166, 531-542.
- [7] Rodriguez, P.L. (1998). Protein phosphatase 2C (PP2C) function in higher plants. *Plant molecular biology* 38, 919-927.
- [8] Broz, A.K., Thelen, J.J., Muszynski, M.G., Miernyk, J.A., and Randall, D.D. (2001). ZMPP2, a novel type-2C protein phosphatase from maize. *Journal of experimental botany* 52, 1739-1740.
- [9] Hu, X., Song, F., Zheng, Z., Molecular characterization and expression analysis of a rice protein phosphatase 2C gene, OsBIPP2C1, and overexpression in transgenic tobacco conferred enhanced disease resistance and abiotic tolerance. *Physiologia Plantarum* 127, 225-236
- [10] Li, B., Zhao, Y., Liang, L., Ren, H., Xing, Y., Chen, L., Sun, M., Wang, Y., Han, Y., Jia, H., Huang, C., Wu, Z., and Jia, W. (2012). Purification and characterization of ZmRIP1, a novel reductant-inhibited protein tyrosine phosphatase from maize. *Plant physiology* 159, 671-681.
- [11] Gupta, R., and Luan, S. (2003). Redox control of protein tyrosine phosphatases and mitogen-activated protein kinases in plants. *Plant physiology* 132, 1149-1152.
- [12] Yu, R.M., Wong, M.M., Jack, R.W., and Kong, R.Y. (2005). Structure, evolution and expression of a second subfamily of protein phosphatase 2A catalytic subunit genes in the rice plant (*Oryza sativa* L.). *Planta* 222, 757-768.
- [13] Smith, R.D., and Walker, J.C. (1991). Isolation and expression of a maize type 1 protein phosphatase. *Plant physiology* 97, 677-683.
