# Supplementary material for: Maize protein phosphatase gene family: identification and molecular characterization
Source: PubMed Central journal article supplement (PMC4169795; doi:10.1186/1471-2164-15-773), 2014-09-09
Supplement: 12864_2014_6458_MOESM13_ESM.pdf [file 12864_2014_6458_MOESM13_ESM.pdf]

**Table S3.** List of 152 detected ZmPP genes and their expression change at 18 selected tissues.

| Name    | 24H_Germi   | 6DAS_GH_Pr | V3_Stem.an | V5_Tip.of.st | V9_Immat   | V9_Thirteen | V9_Eleven | V9_Eig   | VT_Thirtee | R2_Thirte | 10DAP_Wh | 12DAP_Wh | 14DAP_Wh | 16DAP_Wh | 12DAP_End | 14DAP_En | 16DAP_En | 16DAP       | S        | Xmean    | CV       |
|---------|-------------|------------|------------|--------------|------------|-------------|-----------|----------|------------|-----------|----------|----------|----------|----------|-----------|----------|----------|-------------|----------|----------|----------|
|         | nating.Seed | imary.Root | d.SAM      | age.2.Leaf   | ure.Leaves | th.Leaf     | th.Leaf   | hth.Leaf | nth.Leaf   | enth.Leaf | ole.seed | ole.seed | ole.seed | ole.seed | opsperm   | dopsperm | dosperm  | _Embr<br>yo |          |          |          |
| ZmPP19  | 86.73       | 96.93      | 80.92      | 155.17       | 100.46     | 87.72       | 77.76     | 125.73   | 185.27     | 174.25    | 117.77   | 104.71   | 134.46   | 148.4    | 130.96    | 155.7    | 141.94   | 106.01      | 32.56633 | 122.8272 | 0.265139 |
| ZmPP11  | 133.24      | 58.8       | 67.12      | 130.48       | 87.99      | 79.64       | 71.15     | 119.04   | 134.95     | 123.5     | 94.3     | 124.51   | 123.79   | 126.6    | 149.12    | 152.54   | 92.81    | 96.85       | 28.63831 | 109.2461 | 0.262145 |
| ZmPP50  | 83.74       | 70.53      | 59.4       | 65.69        | 72.53      | 70.66       | 63.16     | 123.65   | 115.51     | 105.53    | 83.32    | 101.11   | 124.05   | 147.68   | 140.07    | 173.68   | 145.75   | 96.3        | 34.2432  | 102.3533 | 0.334559 |
| ZmPP23  | 78.78       | 49.75      | 86.66      | 189.52       | 163.67     | 101.15      | 111.28    | 127.04   | 114.8      | 98.24     | 92.07    | 98.28    | 97.51    | 98.88    | 152.89    | 163.72   | 219.46   | 78.5        | 43.521   | 117.9    | 0.369135 |
| ZmPP103 | 120.65      | 52.49      | 44.1       | 103.13       | 89.52      | 93.72       | 97.44     | 116.15   | 114.81     | 139.26    | 75.4     | 93.09    | 103.76   | 106.97   | 106.68    | 127.65   | 133.98   | 40.76       | 28.79286 | 97.75333 | 0.294546 |
| ZmPP70  | 183.46      | 120.24     | 139.47     | 105          | 56.56      | 51.1        | 63.6      | 105.92   | 119.73     | 131.53    | 57.35    | 75.22    | 84.32    | 100.29   | 108.76    | 104.97   | 127.76   | 190.12      | 39.68912 | 106.9667 | 0.371042 |
| ZmPP122 | 93.5        | 109.27     | 88.72      | 75.5         | 109.62     | 92.15       | 64.59     | 51.36    | 60.25      | 91.33     | 95.37    | 79.98    | 83.46    | 73.44    | 92.78     | 61.61    | 85.18    | 190.37      | 30.04134 | 88.80444 | 0.338286 |
| ZmPP17  | 70.68       | 97.16      | 114.34     | 81.1         | 78.04      | 64.76       | 46.52     | 62.83    | 77.66      | 74.16     | 104.08   | 123.01   | 143.79   | 123.3    | 189.57    | 194.79   | 164.74   | 164.69      | 45.53477 | 109.7344 | 0.414954 |
| ZmPP22  | 105.97      | 92.63      | 115.45     | 61.08        | 104.93     | 72.12       | 40.28     | 61.83    | 72.86      | 75.06     | 103.79   | 111.25   | 101.98   | 102.68   | 142.06    | 134.5    | 137.85   | 91.88       | 28.02364 | 96.01111 | 0.291879 |
| ZmPP88  | 106.93      | 99.19      | 80.16      | 44.96        | 69.41      | 95.48       | 68.29     | 80.93    | 64.67      | 79.4      | 111.07   | 121.26   | 132.77   | 118.24   | 191.79    | 170.47   | 100.31   | 152.78      | 38.49881 | 104.895  | 0.367022 |
| ZmPP55  | 117.1       | 163.56     | 126.32     | 133.32       | 76.78      | 68.3        | 58.5      | 48.35    | 101.41     | 108.25    | 94.35    | 98.06    | 190.17   | 173.84   | 329.06    | 266.66   | 152.33   | 103.63      | 71.98124 | 133.8883 | 0.537621 |
| ZmPP102 | 292.66      | 155.15     | 84.21      | 83.54        | 77.63      | 56.09       | 53.02     | 65.46    | 52.8       | 76.76     | 102.75   | 138.84   | 182.03   | 144.6    | 167.03    | 190.63   | 215.4    | 80.27       | 66.93998 | 123.2706 | 0.543033 |
| ZmPP29  | 120.53      | 269.24     | 192.24     | 34.44        | 160.24     | 60.87       | 62.25     | 63.77    | 150.52     | 92.93     | 225.51   | 169.79   | 130.4    | 132.78   | 105.09    | 92.63    | 98.35    | 109.66      | 60.79436 | 126.18   | 0.481807 |
| ZmPP25  | 77.32       | 54.13      | 60.89      | 124.71       | 56.8       | 58.24       | 56.25     | 75.8     | 103.98     | 64.74     | 102      | 148.85   | 170.96   | 183.05   | 251.27    | 239.7    | 215.82   | 85.6        | 67.04556 | 118.3394 | 0.566553 |
| ZmPP106 | 47.87       | 96.13      | 57.95      | 74.81        | 65.42      | 78.2        | 75.62     | 59.74    | 77.76      | 80.18     | 123.1    | 124.54   | 169.89   | 152.38   | 152.64    | 206.02   | 133.43   | 58.24       | 45.68551 | 101.8844 | 0.448405 |
| ZmPP110 | 51.97       | 42.52      | 49.12      | 69.24        | 44.18      | 81.43       | 70.5      | 55.91    | 38.5       | 45.12     | 81.15    | 97.11    | 132.97   | 155.34   | 134.48    | 201.77   | 139.19   | 70.97       | 46.96158 | 86.74833 | 0.541354 |
| ZmPP98  | 76.72       | 76.68      | 95.03      | 33.81        | 85.19      | 48.04       | 46.74     | 58.47    | 49.8       | 43.11     | 132.33   | 151.95   | 222.82   | 182.97   | 241.58    | 280.86   | 282.06   | 172.76      | 84.987   | 126.7178 | 0.670679 |
| ZmPP18  | 18.37       | 47.75      | 46.42      | 76.9         | 57.95      | 43.26       | 34.98     | 68       | 113.66     | 127.33    | 72.47    | 68.55    | 142.88   | 208.62   | 124.57    | 207.43   | 200.61   | 35.54       | 61.91452 | 94.18278 | 0.657387 |
| ZmPP93  | 135.43      | 63.16      | 50.11      | 16.94        | 74.64      | 54.36       | 57.89     | 35.37    | 17.22      | 17.35     | 90.66    | 91.39    | 93.99    | 106.64   | 73.88     | 121.05   | 142.91   | 52.85       | 38.85932 | 71.99111 | 0.539779 |
| ZmPP49  | 65.22       | 75.61      | 57.09      | 36.29        | 45.73      | 46.56       | 32.25     | 27.74    | 16.31      | 23.95     | 73.82    | 88.45    | 114.63   | 112.64   | 150.96    | 164.83   | 110.83   | 52.17       | 43.61522 | 71.94889 | 0.606197 |
| ZmPP36  | 33.92       | 35.71      | 37.29      | 38.35        | 78.27      | 60.91       | 73.64     | 48.68    | 62.46      | 34.97     | 113.93   | 105.6    | 91.85    | 71       | 118.05    | 96.43    | 30.08    | 18.42       | 31.35327 | 63.86444 | 0.490935 |
| ZmPP108 | 104.08      | 51.3       | 50.86      | 48.2         | 54.26      | 57.24       | 67.53     | 59.24    | 35.6       | 23.2      | 113.55   | 69.53    | 64.04    | 60.08    | 26.2      | 37.29    | 27.04    | 40.74       | 24.16731 | 54.99889 | 0.439415 |
| ZmPP109 | 68.27       | 61.73      | 37.15      | 82.04        | 65.04      | 55.12       | 28.91     | 31.86    | 18.64      | 34.39     | 33.5     | 31.26    | 46.16    | 32.12    | 52.96     | 43.44    | 33.9     | 72.83       | 17.87047 | 46.07333 | 0.38787  |
| ZmPP72  | 84.95       | 156.84     | 137.51     | 40.26        | 116.19     | 68.03       | 48.36     | 32.48    | 34.17      | 40.15     | 86.07    | 63.26    | 46.52    | 42.47    | 69.72     | 38.06    | 32.38    | 227.75      | 52.97834 | 75.84278 | 0.698528 |
| ZmPP2   | 96.09       | 58.61      | 62.55      | 29.46        | 50.28      | 39.55       | 38.39     | 50.82    | 48.92      | 47.35     | 78.04    | 58.68    | 71.52    | 66.38    | 34.51     | 54.61    | 68.87    | 38.77       | 16.94713 | 55.18889 | 0.307075 |
| ZmPP4   | 54.73       | 54.5       | 40.08      | 15.25        | 35.33      | 28.29       | 44.2      | 39.33    | 70.65      | 52.03     | 62.42    | 60.92    | 62.61    | 90.72    | 47.06     | 48.54    | 118.18   | 32.02       | 23.64784 | 53.15889 | 0.444852 |
| ZmPP151 | 42.26       | 23.46      | 34.52      | 36.3         | 53.43      | 21.77       | 45.35     | 75.27    | 49.1       | 40.51     | 92.99    | 51.84    | 49.94    | 50.37    | 37.77     | 79.58    | 75.39    | 35.53       | 19.52438 | 49.74333 | 0.392502 |
| ZmPP34  | 67.52       | 74.63      | 54.15      | 45.5         | 43.09      | 38.61       | 43.56     | 66.42    | 58.23      | 44.21     | 62.19    | 75.31    | 82.35    | 83.45    | 93.47     | 118.69   | 97.76    | 54.43       | 22.07527 | 66.865   | 0.330147 |
| ZmPP52  | 86.02       | 35.54      | 54.07      | 44.08        | 23.9       | 26.58       | 24.34     | 47.96    | 64.47      | 68.14     | 73.96    | 63.89    | 82.94    | 79.97    | 69.16     | 68.67    | 66.27    | 107.72      | 23.12912 | 60.42667 | 0.382763 |
| ZmPP51  | 52.28       | 34.73      | 40.73      | 32.44        | 36.55      | 42.31       | 36.28     | 77.74    | 48.34      | 54.47     | 45.67    | 48.52    | 39.22    | 35.68    | 43.57     | 31.53    | 27.7     | 57.84       | 11.9054  | 43.64444 | 0.272782 |
| ZmPP139 | 40.26       | 27.95      | 35.82      | 20.94        | 55.43      | 25.63       | 40.68     | 39.12    | 41.62      | 48.76     | 47.17    | 36.18    | 37.65    | 39.65    | 41.29     | 40.07    | 29.74    | 24.45       | 8.897354 | 37.35611 | 0.238177 |
| ZmPP44  | 19.65       | 31.48      | 19.39      | 32.72        | 28.48      | 33.06       | 26.26     | 34.58    | 73.9       | 82.14     | 41.87    | 40.13    | 49.64    | 74.91    | 43.43     | 58.45    | 58.85    | 35.1        | 18.954   | 43.55778 | 0.435146 |
| ZmPP73  | 26.46       | 48.61      | 29.14      | 46.27        | 11.46      | 27.9        | 35.48     | 66.78    | 72.4       | 49.87     | 34.11    | 42.83    | 52.06    | 43.63    | 47.09     | 49.15    | 35.61    | 19.04       | 15.40924 | 40.99389 | 0.375891 |
| ZmPP100 | 114.47      | 101.34     | 56.33      | 124.67       | 86.32      | 84.17       | 82.51     | 102.42   | 108.93     | 119.81    | 95.88    | 70.54    | 79.86    | 66.98    | 55.66     | 39.54    | 44.79    | 82.55       | 25.25959 | 84.265   | 0.299764 |
| ZmPP144 | 123.14      | 68.86      | 55.47      | 66.03        | 59.83      | 61.24       | 57.76     | 80.77    | 64.79      | 85.04     | 63.5     | 49.81    | 57.04    | 59.5     | 36.47     | 57.84    | 61.65    | 52.92       | 18.1104  | 64.53667 | 0.280622 |
| ZmPP118 | 46.86       | 121.81     | 80.73      | 79.14        | 109.83     | 94.25       | 97.67     | 55.47    | 74.3       | 46.54     | 98.66    | 69.16    | 69.23    | 67.07    | 45.07     | 47.09    | 44.7     | 51.53       | 24.26862 | 72.17278 | 0.336257 |
| ZmPP3   | 123.85      | 95.99      | 104.14     | 78.05        | 94.1       | 110.81      | 96.29     | 93.43    | 104.13     | 96.83     | 144.2    | 104.86   | 100.7    | 94.74    | 72.62     | 69.84    | 75.37    | 35.26       | 23.22791 | 94.17833 | 0.246637 |
| ZmPP99  | 34.81       | 33.42      | 43.42      | 144.55       | 59.78      | 160.48      | 140.63    | 171.7    | 199.57     | 226.62    | 123.63   | 85.98    | 65.84    | 100.22   | 31.71     | 63.51    | 59.27    | 31.91       | 62.33942 | 98.725   | 0.631445 |
| ZmPP80  | 77.71       | 140.55     | 21.43      | 24.29        | 48.08      | 54.87       | 60.13     | 127.5    | 179.26     | 162.22    | 46.61    | 58.41    | 55.57    | 63.08    | 48.79     | 47.99    | 73.79    | 46.31       | 46.12137 | 74.255   | 0.621121 |
| ZmPP21  | 75.69       | 163.88     | 19.66      | 27.28        | 57.76      | 33.63       | 34.15     | 92.61    | 417.64     | 206.29    | 41.72    | 34.33    | 42.05    | 45.29    | 44.78     | 34.15    | 56.44    | 29.78       | 97.29588 | 80.95167 | 1.201901 |
| ZmPP158 | 178.95      | 84.6       | 50.6       | 49.34        | 22.28      | 49.2        | 63.26     | 178.15   | 119.29     | 163.78    | 107.07   | 69.75    | 97.11    | 101.26   | 54.89     | 62.14    | 61.74    | 8.25        | 49.71474 | 84.53667 | 0.588085 |

|         |        |        |        |         |        |        |        |         |        |        |        |        |        |        |        |        |        |        |          |          |          |
|---------|--------|--------|--------|---------|--------|--------|--------|---------|--------|--------|--------|--------|--------|--------|--------|--------|--------|--------|----------|----------|----------|
| ZmPP6   | 1      | 98.92  | 9.3    | 55.95   | 26.67  | 93.52  | 90.96  | 134.77  | 234.03 | 156.6  | 34.8   | 27.67  | 83.61  | 108.86 | 46.78  | 66.46  | 65.89  | 180.34 | 61.72755 | 84.22944 | 0.73285  |
| ZmPP78  | 77.56  | 85.94  | 90.82  | 409.53  | 136.55 | 209.05 | 228.66 | 229.23  | 176.52 | 153.46 | 101.87 | 99.93  | 121.37 | 109.81 | 113.57 | 165.19 | 110.8  | 130.77 | 79.57147 | 152.8128 | 0.520712 |
| ZmPP153 | 131.92 | 97.38  | 72.33  | 206.8   | 84.29  | 112.84 | 98.91  | 158.68  | 154.45 | 232.7  | 93.99  | 74.36  | 90.59  | 115.9  | 73.6   | 95.47  | 115.4  | 112.82 | 44.72542 | 117.9128 | 0.379309 |
| ZmPP89  | 64.26  | 263.61 | 123.59 | 147.73  | 151.43 | 134.48 | 118.88 | 89      | 222.52 | 210.84 | 49.76  | 86.86  | 118.24 | 113.63 | 150.83 | 157.15 | 134.82 | 103.06 | 54.21656 | 135.5939 | 0.399845 |
| ZmPP54  | 37.67  | 78.43  | 96.41  | 67.84   | 74.84  | 206.44 | 204.39 | 75.82   | 54.08  | 51.27  | 118.71 | 106.13 | 111.87 | 124.28 | 105.68 | 101.73 | 119.66 | 99.89  | 45.24209 | 101.9522 | 0.443758 |
| ZmPP115 | 250.89 | 344.61 | 178.36 | 135.41  | 158.08 | 108.32 | 111.13 | 157.21  | 126.66 | 170.25 | 89.07  | 53.28  | 67.48  | 59.79  | 42.77  | 65.4   | 75.16  | 167.12 | 76.53084 | 131.1661 | 0.583465 |
| ZmPP156 | 78.37  | 104.91 | 134.46 | 142.66  | 68.27  | 50.09  | 170.65 | 194.37  | 133.09 | 110.5  | 73.26  | 52.13  | 48.14  | 34.29  | 43.86  | 28.94  | 22.56  | 79.63  | 50.75437 | 87.23222 | 0.581831 |
| ZmPP87  | 274.9  | 134.86 | 77.16  | 214.74  | 98.48  | 145.96 | 157.3  | 214.48  | 244.05 | 195.42 | 28.29  | 34.44  | 45.01  | 50.64  | 33.42  | 61.58  | 227.81 | 4.41   | 87.18927 | 124.6083 | 0.699707 |
| ZmPP150 | 43.53  | 84.17  | 68.76  | 537.66  | 55.03  | 63.27  | 53.17  | 391.59  | 628.05 | 375.22 | 61.49  | 99.89  | 154.89 | 137.31 | 164.95 | 195.88 | 137.23 | 89.46  | 176.5535 | 185.6417 | 0.951045 |
| ZmPP101 | 69.1   | 121.23 | 106.65 | 582.91  | 31.27  | 54.49  | 73.21  | 124.9   | 260.53 | 171.79 | 114.35 | 106.21 | 100.77 | 87.79  | 85.79  | 67.37  | 77.4   | 46.84  | 125.0333 | 126.8111 | 0.985981 |
| ZmPP145 | 100.86 | 430.88 | 229.15 | 1452.46 | 87.76  | 279.48 | 418.84 | 582.75  | 256.24 | 361.99 | 166.82 | 104.78 | 109.7  | 104.61 | 126.07 | 87.01  | 60.47  | 240.7  | 325.3778 | 288.9206 | 1.126184 |
| ZmPP58  | 122.36 | 24.46  | 32.47  | 1899.49 | 74.05  | 136.88 | 213.28 | 1271.24 | 987.26 | 805.4  | 73.92  | 70.76  | 86.51  | 94.97  | 43.24  | 98.25  | 127.83 | 32.06  | 534.5665 | 344.135  | 1.553363 |
| ZmPP10  | 47.99  | 25.64  | 23.44  | 74.4    | 24.56  | 20.89  | 17.24  | 39.67   | 55.22  | 47.74  | 17.63  | 21.12  | 15.55  | 24.01  | 27.94  | 17.47  | 16.3   | 19.11  | 16.48505 | 29.77333 | 0.553685 |
| ZmPP131 | 19.17  | 21.4   | 17.85  | 21.75   | 25.06  | 15.8   | 17.02  | 22.47   | 33.74  | 35     | 18.99  | 19.85  | 26.72  | 25.42  | 33.02  | 32.01  | 16.02  | 29.55  | 6.41658  | 23.93556 | 0.268077 |
| ZmPP143 | 30.32  | 10.16  | 19.8   | 24.01   | 16.98  | 50.37  | 58.6   | 30.39   | 21.22  | 19.25  | 11.03  | 18.08  | 24.33  | 34.68  | 18.84  | 30.05  | 23.89  | 27.1   | 12.30947 | 26.06111 | 0.472331 |
| ZmPP42  | 16.81  | 36.33  | 37.08  | 25.97   | 40.91  | 30.38  | 49.93  | 46.19   | 37.25  | 32.09  | 32.77  | 24.21  | 15.58  | 16.96  | 5.97   | 6.79   | 12.2   | 33.36  | 13.04704 | 27.82111 | 0.468962 |
| ZmPP116 | 12.36  | 18.85  | 27.98  | 25.23   | 11.71  | 13.95  | 17.7   | 27.09   | 58.56  | 88.58  | 33.1   | 21.14  | 27.88  | 55.89  | 21.5   | 35.61  | 73.65  | 28.17  | 21.75225 | 33.275   | 0.653712 |
| ZmPP86  | 35.15  | 84.05  | 66.25  | 63.88   | 24.62  | 23.76  | 23.57  | 9.24    | 65.19  | 16.83  | 53.18  | 34.77  | 28.01  | 35.02  | 42.59  | 53.06  | 13.09  | 91.25  | 24.13621 | 42.41722 | 0.569019 |
| ZmPP137 | 44.57  | 20.8   | 28.38  | 35.03   | 18.21  | 15.2   | 19.73  | 18.94   | 28.76  | 36.62  | 48.12  | 52.94  | 24.75  | 23.16  | 48.44  | 33.5   | 16.1   | 86.87  | 17.92774 | 33.34    | 0.537725 |
| ZmPP123 | 63.72  | 53.15  | 47.41  | 24.21   | 45.2   | 47.83  | 39.8   | 30.05   | 18.73  | 12.09  | 53.86  | 30.82  | 36.61  | 44.17  | 26.2   | 27.6   | 20.57  | 89.75  | 18.71904 | 39.54278 | 0.473387 |
| ZmPP90  | 47.38  | 33.88  | 23.53  | 16.95   | 39.99  | 35.54  | 26.51  | 14.62   | 21.1   | 11.84  | 40.81  | 41.91  | 32.3   | 32.77  | 40.87  | 29.46  | 14.77  | 22.18  | 10.82061 | 29.245   | 0.369999 |
| ZmPP159 | 75.77  | 31.77  | 35.87  | 165.75  | 41.98  | 61.81  | 74.69  | 83.79   | 53.52  | 170.76 | 32.34  | 41.65  | 47.23  | 27.8   | 19.08  | 15.57  | 20.13  | 27.8   | 45.14869 | 57.07278 | 0.791072 |
| ZmPP30  | 57.62  | 35.93  | 26.16  | 265.78  | 17.58  | 35.29  | 28.23  | 66.12   | 104.09 | 69.26  | 38.79  | 28.76  | 52.97  | 45.65  | 26.74  | 35.91  | 39.87  | 22.06  | 56.56333 | 55.37833 | 1.021398 |
| ZmPP14  | 7      | 27.98  | 38.37  | 251.77  | 32.48  | 40.88  | 38.32  | 139.01  | 112.86 | 56.77  | 41     | 35.3   | 32.71  | 33.27  | 19.21  | 16.79  | 18.78  | 35.08  | 59.11932 | 54.31    | 1.088553 |
| ZmPP16  | 36.37  | 11.11  | 15.32  | 194.19  | 21.87  | 42.26  | 55.82  | 101.67  | 105.98 | 58.97  | 11.03  | 32.16  | 40.08  | 52.33  | 58.09  | 64.07  | 59.46  | 20.86  | 44.21424 | 54.53556 | 0.810741 |
| ZmPP125 | 12.4   | 22.69  | 19.02  | 12.51   | 18.86  | 20.24  | 15.52  | 21.85   | 11.74  | 15.06  | 17.52  | 19.67  | 15.39  | 17.67  | 10.92  | 11.33  | 12.41  | 13.47  | 3.792395 | 16.015   | 0.236803 |
| ZmPP138 | 26.31  | 16.74  | 17.22  | 33.8    | 23.57  | 12.75  | 8.58   | 14.47   | 41.93  | 28.06  | 15.08  | 11.31  | 11.81  | 4.94   | 10.28  | 12.6   | 10.6   | 7.62   | 9.8612   | 17.09278 | 0.576922 |
| ZmPP85  | 14.41  | 40.75  | 21.52  | 7.39    | 8.86   | 13.49  | 14.3   | 38.81   | 38.2   | 17.33  | 4.18   | 21.69  | 3.94   | 25.63  | 22.38  | 16.65  | 20.95  | 16.58  | 11.05393 | 19.28111 | 0.573304 |
| ZmPP82  | 61.84  | 74.98  | 28.2   | 89.98   | 10.73  | 22.46  | 13.67  | 47.84   | 88.85  | 59.78  | 7.93   | 22.7   | 24.59  | 25.75  | 39.28  | 17.39  | 38.7   | 5.94   | 26.99687 | 37.81167 | 0.713983 |
| ZmPP114 | 75.76  | 44.79  | 21.2   | 27.82   | 9.38   | 11.96  | 12.38  | 42.34   | 29.85  | 47.7   | 23.2   | 27.71  | 22.25  | 5.25   | 11.98  | 4.66   | 43.49  | 20.46  | 18.31071 | 26.78778 | 0.683547 |
| ZmPP38  | 50.32  | 15.59  | 16.82  | 24.29   | 13.18  | 61.82  | 74.21  | 62.24   | 85.74  | 39.08  | 34.95  | 29.9   | 17.63  | 24.9   | 37.93  | 19.89  | 11.09  | 7.18   | 23.18014 | 34.82    | 0.665713 |
| ZmPP128 | 17.92  | 16.89  | 18.28  | 40.04   | 67.26  | 58.47  | 77.96  | 56.55   | 100.36 | 42.21  | 40.82  | 23.87  | 18.76  | 19.83  | 7.53   | 5.79   | 14.51  | 0      | 27.71057 | 34.83611 | 0.795455 |
| ZmPP155 | 6.59   | 7.76   | 11.01  | 34.28   | 10.1   | 20.51  | 35.25  | 89.86   | 180.88 | 261.1  | 40.2   | 19.72  | 19.8   | 28.6   | 7.88   | 8.79   | 5.43   | 11.13  | 68.67721 | 44.38278 | 1.547384 |
| ZmPP1   | 9.25   | 19.32  | 9.46   | 211.37  | 7.31   | 32.74  | 39.79  | 53.17   | 112.52 | 102.59 | 5.83   | 15.78  | 9.49   | 10.31  | 8.61   | 11.09  | 4.33   | 9.66   | 54.01575 | 37.36778 | 1.445517 |
| ZmPP83  | 71.68  | 31.36  | 24.31  | 105.5   | 42.17  | 53.22  | 78.98  | 117.54  | 181.27 | 106.38 | 75.35  | 42.28  | 53.77  | 56.59  | 22.98  | 30.38  | 5.99   | 8.93   | 44.40495 | 61.59333 | 0.720938 |
| ZmPP107 | 48.2   | 42.27  | 31.19  | 142.04  | 41.21  | 58.26  | 52.45  | 63.99   | 159.11 | 178.67 | 91.25  | 64.72  | 55.99  | 47.13  | 14.83  | 25.94  | 0      | 3.33   | 50.55546 | 62.25444 | 0.812078 |
| ZmPP59  | 30.13  | 11.58  | 20.36  | 464.6   | 58.85  | 110    | 107.85 | 82.33   | 197.53 | 148.3  | 46.8   | 29.58  | 19.49  | 17.16  | 8.26   | 9.58   | 0      | 39.82  | 110.7579 | 77.90111 | 1.421776 |
| ZmPP28  | 56.73  | 71.16  | 34.63  | 68.1    | 67.71  | 90.63  | 86.86  | 61.63   | 75.75  | 59.35  | 43.11  | 34.38  | 30.86  | 29.01  | 19.89  | 11.55  | 5.88   | 22.41  | 25.90218 | 48.31333 | 0.536129 |
| ZmPP12  | 31.37  | 45.8   | 37.47  | 46.55   | 80.72  | 52.42  | 46.43  | 48.85   | 67.07  | 45.84  | 60.33  | 44.75  | 29.96  | 25.42  | 18.93  | 14.75  | 6.03   | 66.71  | 19.43151 | 42.74444 | 0.454597 |
| ZmPP134 | 76.46  | 87.51  | 80.47  | 58      | 93.92  | 127.86 | 138.9  | 112.95  | 78.94  | 60.23  | 58.76  | 20.75  | 24.19  | 27.46  | 12.51  | 11.93  | 0      | 61.02  | 40.9411  | 62.88111 | 0.651087 |
| ZmPP8   | 24.85  | 391.91 | 52.67  | 37.84   | 102.52 | 148.16 | 246.17 | 669.76  | 229.76 | 118.12 | 40.81  | 53.15  | 33.14  | 40.03  | 59.16  | 18.81  | 0      | 76.63  | 167.7897 | 130.1939 | 1.288768 |
| ZmPP132 | 346.97 | 36.85  | 31.38  | 79.56   | 41.34  | 224.3  | 195.71 | 126.77  | 340.7  | 241.99 | 84.43  | 48.4   | 51.85  | 33.31  | 0      | 0      | 0      | 96.19  | 112.4239 | 109.9861 | 1.022164 |
| ZmPP53  | 154.01 | 41.77  | 24.35  | 37.36   | 38.92  | 134.18 | 123.95 | 149.89  | 268.66 | 214.99 | 51.58  | 20.59  | 26.04  | 10.53  | 0      | 0      | 0      | 87.25  | 79.80197 | 76.89278 | 1.037834 |
| ZmPP71  | 32.14  | 2.62   | 63.79  | 711.8   | 68.54  | 77.8   | 139.25 | 350.62  | 620.52 | 569.74 | 136.58 | 67.69  | 72.32  | 63.43  | 7.49   | 6.86   | 2.95   | 16.21  | 230.5876 | 167.2417 | 1.378769 |
| ZmPP62  | 93.89  | 84.47  | 108.92 | 164.67  | 101.8  | 109.65 | 123.11 | 151.57  | 235.94 | 218.06 | 177.87 | 195.21 | 253.95 | 276.46 | 273.04 | 308.82 | 243.79 | 323.81 | 78.28694 | 191.3906 | 0.409043 |

|          |        |        |        |         |        |        |        |         |         |         |         |        |         |         |         |         |         |        |          |          |          |
|----------|--------|--------|--------|---------|--------|--------|--------|---------|---------|---------|---------|--------|---------|---------|---------|---------|---------|--------|----------|----------|----------|
| ZmPP79   | 98.65  | 110.13 | 97.73  | 109.73  | 125.69 | 103.81 | 81.15  | 109.83  | 132.4   | 124.21  | 128.9   | 159.91 | 154.8   | 208.13  | 233.8   | 230.28  | 308.01  | 178.08 | 60.29382 | 149.7356 | 0.402669 |
| ZmPP104  | 105.17 | 153.32 | 107.8  | 139.19  | 100.88 | 143.41 | 140.62 | 65.4    | 127.27  | 152.5   | 233.06  | 266.91 | 283.64  | 267.23  | 415.18  | 410.91  | 281.32  | 165.61 | 103.2307 | 197.7456 | 0.522038 |
| ZmPP136  | 221.13 | 105.9  | 129.84 | 135.77  | 113.92 | 138.75 | 132.06 | 135.75  | 147.11  | 126.47  | 204.34  | 181.26 | 156.36  | 170.18  | 223.23  | 212.9   | 133.61  | 169.38 | 37.11035 | 157.6644 | 0.235376 |
| ZmPP45   | 141.36 | 151.59 | 140.42 | 117.04  | 154.95 | 143.24 | 107.71 | 109.51  | 97.41   | 112.8   | 164.69  | 149.47 | 160.11  | 132.86  | 167.43  | 181.89  | 100.46  | 154.92 | 25.2214  | 138.2144 | 0.18248  |
| ZmPP140  | 294.6  | 223.92 | 166.07 | 296.76  | 164.78 | 249.5  | 248.95 | 331.43  | 399.94  | 351.53  | 292.81  | 223.44 | 201.89  | 139.78  | 125.06  | 121.73  | 150.25  | 100.07 | 87.5803  | 226.8061 | 0.386146 |
| ZmPP57   | 207.83 | 111.27 | 64.92  | 278.65  | 127.14 | 150.95 | 133.96 | 124.52  | 400.19  | 344.95  | 261.22  | 239.11 | 328.61  | 224.49  | 225.46  | 246.34  | 194.02  | 267.13 | 89.08158 | 218.3756 | 0.407928 |
| ZmPP26   | 294.8  | 291.29 | 209.19 | 189.75  | 126.69 | 79.33  | 181.86 | 240.94  | 243.86  | 215.49  | 485.61  | 459.04 | 473.04  | 441.23  | 423.19  | 518.92  | 288.71  | 144.09 | 137.9824 | 294.835  | 0.467999 |
| E2enzyme | 526.29 | 501.67 | 439.02 | 829.2   | 344.32 | 340.79 | 431.32 | 508.82  | 541.87  | 519.76  | 475.93  | 522.29 | 801.41  | 722.73  | 721.81  | 926.18  | 1034.85 | 680.41 | 197.9729 | 603.815  | 0.32787  |
| ZmPP76   | 628.27 | 358.44 | 358.85 | 1317.49 | 354.8  | 299.29 | 284.39 | 422.72  | 950.86  | 1070.13 | 284.2   | 345.26 | 679.04  | 881.93  | 527.06  | 926.9   | 1323.07 | 470.39 | 354.3056 | 637.9494 | 0.555382 |
| ZmPP84   | 436.03 | 256.04 | 402.69 | 1100.71 | 400.87 | 381.69 | 351.96 | 458.86  | 805.27  | 832.08  | 312.72  | 387.22 | 482.17  | 482.67  | 375.63  | 512.14  | 526.65  | 379.43 | 211.9055 | 493.6017 | 0.429305 |
| ZmPP65   | 264.27 | 479.53 | 277.41 | 475.32  | 188.25 | 280.73 | 368.08 | 642.73  | 642.85  | 643.9   | 381.65  | 389.09 | 508.58  | 429.17  | 446.89  | 491.03  | 327.24  | 299.39 | 136.2597 | 418.6728 | 0.325456 |
| ZmPP47   | 755.27 | 476.46 | 555.94 | 242.02  | 852.98 | 641.34 | 545.38 | 254.39  | 281.71  | 240.24  | 1058.96 | 820.18 | 762.06  | 695.32  | 609.25  | 584.71  | 706.63  | 400.18 | 233.7474 | 582.39   | 0.401359 |
| ZmPP5    | 485.79 | 279.08 | 282.93 | 192.63  | 317.23 | 314.19 | 224.83 | 231.11  | 369.04  | 344.45  | 469.67  | 866.6  | 1062.57 | 1245.66 | 1348.98 | 1476.92 | 1671.46 | 229.44 | 500.1769 | 634.0322 | 0.788882 |
| ZmPP9    | 17.51  | 51.18  | 21.52  | 10.94   | 33.68  | 14.92  | 15.29  | 8.2     | 7.61    | 9.24    | 32.91   | 28.39  | 45      | 59.24   | 33.93   | 56.91   | 67.38   | 15.26  | 19.31659 | 29.395   | 0.657139 |
| ZmPP135  | 42.61  | 36.44  | 47.14  | 4.25    | 9.61   | 14.31  | 12.8   | 5.38    | 1.89    | 4.46    | 38.68   | 34.67  | 56.3    | 90.06   | 70.23   | 80.19   | 63.69   | 61.35  | 28.50864 | 37.44778 | 0.761291 |
| ZmPP48   | 7.06   | 40.7   | 55.51  | 1.71    | 25.53  | 10.9   | 8.22   | 7.79    | 10.8    | 12.14   | 40.56   | 21.13  | 15.76   | 25.7    | 18.73   | 17.61   | 12.52   | 100.86 | 23.66088 | 24.06833 | 0.983071 |
| ZmPP41   | 4.84   | 20.57  | 26.01  | 3.56    | 5.44   | 7.32   | 10.51  | 3.24    | 3.54    | 3.66    | 29.28   | 21.74  | 19.8    | 40.07   | 22.61   | 30.26   | 28.91   | 22.01  | 11.70103 | 16.85389 | 0.694263 |
| ZmPP119  | 21.69  | 29.81  | 42.14  | 1       | 43.18  | 36.01  | 18.85  | 0       | 0       | 0       | 14.77   | 16.17  | 18.01   | 20.57   | 21.24   | 14.33   | 7.23    | 121.24 | 27.85896 | 23.68    | 1.176476 |
| ZmPP129  | 14.77  | 19.3   | 23.31  | 13.4    | 20.32  | 20.91  | 15.53  | 0       | 0       | 0       | 23.64   | 14.27  | 16.68   | 16.49   | 18.15   | 14.18   | 15.18   | 45.68  | 10.38766 | 16.21167 | 0.640752 |
| ZmPP20   | 7.69   | 12.18  | 22.69  | 2.86    | 20.07  | 9.74   | 68.7   | 18.77   | 116.35  | 1       | 28.12   | 23.94  | 90.37   | 6.69    | 20.62   | 3.1     | 109.26  | 115.73 | 41.76325 | 37.66    | 1.108955 |
| ZmPP64   | 21.33  | 11.42  | 15.13  | 12.36   | 12.34  | 13.11  | 2.21   | 15.86   | 12.95   | 23.89   | 26.78   | 29.57  | 37.61   | 38.59   | 40.68   | 38.96   | 43.13   | 22.72  | 12.35227 | 23.25778 | 0.531103 |
| ZmPP111  | 27.47  | 12.11  | 17.88  | 8.65    | 14.13  | 7.82   | 1.4    | 19.14   | 15.13   | 26.74   | 7.56    | 21.01  | 27.49   | 40.68   | 32.64   | 41.94   | 37.29   | 11.84  | 12.10153 | 20.60667 | 0.587263 |
| ZmPP37   | 6.65   | 4      | 6.72   | 5.13    | 4.63   | 1.03   | 3.71   | 15.04   | 5.72    | 10.18   | 12.52   | 18.16  | 20.84   | 29.53   | 22.56   | 40.62   | 29.13   | 11.47  | 10.99587 | 13.75778 | 0.799247 |
| ZmPP124  | 9.28   | 2.55   | 3.57   | 3.65    | 16.2   | 11.76  | 12.51  | 6.13    | 13.52   | 11.84   | 7.88    | 6.93   | 15.95   | 14.11   | 15.79   | 14.81   | 32.79   | 6      | 7.02542  | 11.40389 | 0.616055 |
| ZmPP32   | 8.66   | 11.83  | 6.12   | 7.11    | 5.91   | 5.35   | 4.75   | 8.22    | 8.8     | 8.85    | 10.08   | 11.38  | 7.44    | 12.2    | 4.14    | 18.44   | 27.12   | 7.04   | 5.523947 | 9.635556 | 0.573288 |
| ZmPP127  | 3.65   | 18.66  | 7.91   | 9       | 17.39  | 18.29  | 19.08  | 13.37   | 13.59   | 17.04   | 10.05   | 13.18  | 15.17   | 14.2    | 13.38   | 17.29   | 27.16   | 0      | 6.201505 | 13.80056 | 0.449366 |
| ZmPP27   | 30.24  | 26.71  | 11.41  | 6.78    | 0      | 22.85  | 7.08   | 39.87   | 20.18   | 7.05    | 22.83   | 27.46  | 35.28   | 34.54   | 21.24   | 25.67   | 19.09   | 0      | 12.07559 | 19.90444 | 0.606678 |
| ZmPP154  | 18.85  | 0      | 0      | 1       | 0      | 3.45   | 3.37   | 2.2     | 98.34   | 50.54   | 40.05   | 63.79  | 136.67  | 114.54  | 109.52  | 160.02  | 167.43  | 64.2   | 59.62732 | 57.44278 | 1.03803  |
| ZmPP112  | 46.23  | 1      | 0      | 1.38    | 0      | 11.02  | 15.08  | 11.92   | 72.07   | 135.79  | 23.32   | 14.23  | 30.52   | 27.04   | 15.58   | 18.26   | 16.86   | 55.31  | 33.38418 | 27.53389 | 1.212476 |
| ZmPP92   | 27.53  | 66.98  | 18.93  | 101.3   | 0      | 0      | 3.92   | 0       | 28.98   | 20.17   | 39.98   | 24.05  | 54.11   | 83.14   | 46.96   | 75.93   | 66.77   | 384.64 | 87.12356 | 57.96611 | 1.503009 |
| ZmPP146  | 34.67  | 46.29  | 130.05 | 0       | 109.01 | 25.36  | 11.62  | 1.03    | 0       | 0       | 132.57  | 176.53 | 230.93  | 236.94  | 296.67  | 296.1   | 323.41  | 187.2  | 115.8347 | 124.3544 | 0.931489 |
| ZmPP31   | 59.23  | 0      | 0      | 0       | 0      | 0      | 0      | 1.56    | 0       | 0       | 6.81    | 84.53  | 226.51  | 352.45  | 187.67  | 369.19  | 711.8   | 83.09  | 192.5529 | 115.7133 | 1.664051 |
| ZmPP33   | 27.74  | 18.96  | 19.71  | 36.34   | 8.39   | 5.94   | 14.44  | 31.32   | 29.81   | 17.45   | 15.63   | 17.08  | 17.84   | 13.92   | 15.46   | 4.28    | 0       | 6.26   | 9.857497 | 16.69833 | 0.590328 |
| ZmPP77   | 19.24  | 28.81  | 22.81  | 15.76   | 7.58   | 7.58   | 14.93  | 14.07   | 17.68   | 24.24   | 12.27   | 11     | 9.82    | 12.18   | 1.75    | 2.69    | 0       | 28.51  | 8.562715 | 13.94    | 0.614255 |
| ZmPP117  | 11.08  | 5.37   | 8.81   | 16.52   | 5.73   | 7.33   | 6.22   | 10.81   | 15.87   | 18.61   | 9.61    | 5.01   | 6.12    | 8.54    | 4.82    | 2.79    | 4.72    | 8.31   | 4.44529  | 8.681667 | 0.512032 |
| ZmPP152  | 28.24  | 12.65  | 8.12   | 16.69   | 6.92   | 16.94  | 30.89  | 47.82   | 28.57   | 34.23   | 23.97   | 23.69  | 11.47   | 7.59    | 1       | 5.51    | 0       | 1      | 13.38309 | 16.96111 | 0.789046 |
| ZmPP147  | 5.53   | 70.4   | 11     | 12.71   | 13.58  | 22.65  | 50.78  | 124.61  | 17.99   | 9.42    | 7.44    | 0      | 6.11    | 2.83    | 1.94    | 0       | 0       | 18.35  | 31.71553 | 20.85222 | 1.520966 |
| ZmPP66   | 7.72   | 11.71  | 2.46   | 16.01   | 4.65   | 21.03  | 19.79  | 4.42    | 23.26   | 26.19   | 8.73    | 0      | 1.5     | 0       | 0       | 0       | 0       | 0      | 9.175978 | 8.192778 | 1.120008 |
| ZmPP149  | 11.83  | 31.42  | 6.6    | 19.94   | 0      | 18.76  | 38     | 93.64   | 49.31   | 77.6    | 0       | 0      | 6.73    | 15.1    | 22.27   | 7.45    | 20.8    | 0      | 26.64472 | 23.30278 | 1.143414 |
| ZmPP39   | 109.83 | 9.38   | 0      | 11.21   | 0      | 15.53  | 18.43  | 48.53   | 108.15  | 132.07  | 12.18   | 0      | 9.6     | 23.95   | 4.59    | 0       | 0       | 62.25  | 42.8971  | 31.42778 | 1.364942 |
| ZmPP24   | 5.47   | 48.37  | 13.48  | 121.56  | 29.64  | 34.27  | 65.03  | 204.93  | 364.07  | 257.86  | 7.82    | 2.61   | 0       | 7.15    | 0       | 0       | 0       | 5.18   | 105.4607 | 64.85778 | 1.62603  |
| ZmPP105  | 29.36  | 16.51  | 9.29   | 50.66   | 17.14  | 31.45  | 80.86  | 222.44  | 78.9    | 95.09   | 1.72    | 1.91   | 2.45    | 3.72    | 0       | 0       | 1.87    | 1      | 56.00367 | 35.79833 | 1.564421 |
| ZmPP46   | 1      | 1      | 7.89   | 557.11  | 16.68  | 97.57  | 145.82 | 395     | 290.13  | 132.36  | 4.39    | 5.18   | 3.62    | 3.18    | 0       | 0       | 0       | 3.62   | 161.8587 | 92.475   | 1.750297 |
| ZmPP133  | 32.01  | 13.64  | 18.95  | 2070.35 | 0      | 0      | 7.62   | 2492.37 | 1535.25 | 826.17  | 12.51   | 3.39   | 15.1    | 29.07   | 10.68   | 9.91    | 0       | 12.76  | 795.1527 | 393.8767 | 2.018786 |
| ZmPP120  | 0      | 18.64  | 12.61  | 0       | 18.22  | 3.35   | 2.59   | 0       | 0       | 0       | 11.3    | 7.03   | 5.77    | 7.59    | 5.33    | 5.85    | 0       | 9.34   | 6.091419 | 5.978889 | 1.018821 |

|         |       |        |       |       |       |       |       |       |       |       |       |       |       |       |       |       |       |       |          |          |          |
|---------|-------|--------|-------|-------|-------|-------|-------|-------|-------|-------|-------|-------|-------|-------|-------|-------|-------|-------|----------|----------|----------|
| ZmPP69  | 3.53  | 8.33   | 6.87  | 2.43  | 8.18  | 2.07  | 4.44  | 0     | 0     | 1.11  | 6.65  | 5.43  | 1.69  | 4.6   | 3.69  | 2.31  | 0     | 19.02 | 4.517009 | 4.463889 | 1.0119   |
| ZmPP68  | 11.05 | 12.43  | 10.87 | 1.6   | 14.9  | 9.61  | 6.55  | 2.85  | 0     | 0     | 6.64  | 4.23  | 7.18  | 7.8   | 9.79  | 6.47  | 0     | 19.58 | 5.405642 | 7.308333 | 0.739655 |
| ZmPP13  | 13.47 | 5.05   | 8.09  | 6.03  | 2.9   | 5.35  | 1.83  | 8.96  | 1     | 2.03  | 10.9  | 1     | 0     | 1     | 1.51  | 20.99 | 30.28 | 4.17  | 7.93547  | 6.92     | 1.146744 |
| ZmPP74  | 22.52 | 1.19   | 1.41  | 1     | 6.14  | 4.41  | 1     | 4.43  | 7.68  | 2.64  | 4.58  | 4.12  | 4.9   | 5.68  | 3.07  | 6.13  | 14.15 | 3.22  | 5.261377 | 5.459444 | 0.96372  |
| ZmPP75  | 15.94 | 6.8    | 5.21  | 6.94  | 1.05  | 7.64  | 3.24  | 1.17  | 2.34  | 2.41  | 23.09 | 14.26 | 23.13 | 28.05 | 13.22 | 31.71 | 15.69 | 1     | 9.873044 | 11.27167 | 0.875917 |
| ZmPP141 | 15.64 | 30.9   | 14.18 | 1.65  | 3.48  | 8.72  | 7.72  | 3.95  | 1.03  | 3.67  | 30.75 | 16.46 | 20.07 | 18.21 | 6.37  | 11.35 | 1.03  | 1     | 9.59569  | 10.89889 | 0.880428 |
| ZmPP7   | 0     | 0      | 2.65  | 0     | 0     | 0     | 0     | 0     | 0     | 0     | 9.34  | 7.97  | 11.02 | 24.31 | 5.09  | 2.75  | 0     | 0     | 6.335034 | 3.507222 | 1.806282 |
| ZmPP121 | 72.84 | 0      | 1     | 4.7   | 35.55 | 11.33 | 11.98 | 10.76 | 2.79  | 2.31  | 15.43 | 10.76 | 10.66 | 4.29  | 6.02  | 2.05  | 0     | 20.53 | 17.45321 | 12.38889 | 1.40878  |
| ZmPP35  | 20.95 | 0      | 59.31 | 0     | 67.6  | 33.15 | 11.08 | 0     | 0     | 0     | 8.47  | 8.14  | 9.41  | 12.38 | 0     | 0     | 0     | 45.66 | 21.66058 | 15.34167 | 1.411879 |
| ZmPP67  | 0     | 151.88 | 157.7 | 30.81 | 0     | 0     | 6.07  | 18.07 | 0     | 0     | 23.34 | 22.02 | 21.44 | 21.79 | 0     | 0     | 0     | 0     | 48.38997 | 25.17333 | 1.922271 |
| ZmPP97  | 0     | 0      | 0     | 15.04 | 0     | 4.95  | 5.25  | 7.88  | 18.54 | 15.86 | 0     | 0     | 0     | 0     | 0     | 0     | 0     | 0     | 6.335508 | 3.751111 | 1.688968 |
| ZmPP95  | 1.86  | 2.19   | 1.22  | 8.29  | 1.55  | 1.73  | 4.92  | 9.67  | 3.99  | 1.45  | 1     | 1.55  | 1     | 1.96  | 1     | 1     | 0     | 1     | 2.617111 | 2.521111 | 1.038078 |
| ZmPP81  | 5.21  | 4.35   | 7.98  | 5.22  | 1     | 1.3   | 3.6   | 10.58 | 10.85 | 8.73  | 1     | 7     | 1.38  | 4.9   | 9.53  | 4.65  | 1.46  | 2.08  | 3.387656 | 5.045556 | 0.671414 |
| ZmPP96  | 4.41  | 1      | 1     | 1     | 8.35  | 3.88  | 17.38 | 3.61  | 6.7   | 8.91  | 1     | 1.24  | 1     | 1.64  | 1     | 1     | 12.17 | 7.33  | 4.71193  | 4.59     | 1.026564 |
| ZmPP130 | 0     | 0      | 0     | 0     | 0     | 0     | 0     | 0     | 0     | 0     | 2.03  | 0     | 3.6   | 0     | 0     | 2.91  | 0     | 0     | 1.124519 | 0.474444 | 2.370181 |
| ZmPP148 | 0     | 0      | 0     | 0     | 0     | 0     | 0     | 0     | 0     | 0     | 1.65  | 0     | 0     | 3.89  | 0     | 0     | 0     | 0     | 0.974665 | 0.307778 | 3.166781 |
| ZmPP40  | 4.13  | 0      | 0     | 0     | 0     | 2.64  | 0     | 0     | 0     | 0     | 0     | 0     | 0     | 0     | 0     | 0     | 0     | 0     | 1.124074 | 0.376111 | 2.988676 |
| ZmPP43  | 0     | 0      | 0     | 0     | 0     | 0     | 0     | 2.41  | 10.75 | 0     | 0     | 0     | 0     | 0     | 0     | 0     | 0     | 0     | 2.56388  | 0.731111 | 3.506827 |
| ZmPP60  | 0     | 0      | 0     | 0     | 0     | 0     | 0     | 0     | 4.16  | 0     | 0     | 0     | 0     | 0     | 0     | 0     | 0     | 0     | 0.980521 | 0.231111 | 4.242641 |
| ZmPP113 | 0     | 0      | 2.49  | 0     | 0     | 52.91 | 30.72 | 0     | 0     | 0     | 1.08  | 0     | 0     | 0     | 0     | 0     | 0     | 0     | 13.99184 | 4.844444 | 2.888224 |
| ZmPP94  | 0     | 208.51 | 0     | 0     | 0     | 0     | 0     | 0     | 0     | 0     | 0     | 0     | 0     | 0     | 0     | 0     | 0     | 0     | 49.14628 | 11.58389 | 4.242641 |
| ZmPP56  | 0     | 0      | 0     | 0     | 0     | 0     | 0     | 0     | 0     | 0     | 1.54  | 1     | 1     | 2.76  | 31.21 | 2.01  | 72.61 | 31.26 | 18.93834 | 7.966111 | 2.377363 |
