# Supplementary material for: Maize protein phosphatase gene family: identification and molecular characterization
Source: PubMed Central journal article supplement (PMC4169795; doi:10.1186/1471-2164-15-773), 2014-09-09
Supplement: 12864_2014_6458_MOESM14_ESM.pdf [file 12864_2014_6458_MOESM14_ESM.pdf]

**Table S4.** List of putative root development signaling components in maize.

| <b>Name</b> | <b>Gene ID</b> | <b>Protein ID</b> | <b>Class</b>                            |
|-------------|----------------|-------------------|-----------------------------------------|
| ZmPP11      | GRMZM2G028700  | GRMZM2G028700_P01 | PP2A                                    |
| ZmPP13      | GRMZM2G004582  | GRMZM2G004582_P01 | PP2A                                    |
| ZmPP15      | GRMZM2G470452  | GRMZM2G470452_P01 | PP2A                                    |
| ZmPP17      | GRMZM2G382077  | GRMZM2G382077_P01 | PP2A                                    |
| ZmPP19      | GRMZM2G070323  | GRMZM2G070323_P01 | PP2A                                    |
| ZmPP22      | GRMZM2G062394  | GRMZM2G062394_P01 | PP2A                                    |
| ZmPP32      | GRMZM2G039359  | GRMZM2G039359_P04 | PP2A                                    |
| ZmPP36      | GRMZM2G180691  | GRMZM2G180691_P01 | PP2A                                    |
| ZmPP50      | GRMZM2G009593  | GRMZM2G009593_P01 | PP2A                                    |
| ZmPP55      | GRMZM2G055905  | GRMZM2G055905_P01 | PP2A                                    |
| ZmPP65      | GRMZM2G112240  | GRMZM2G112240_P01 | PP2A                                    |
| ZmPP73      | GRMZM2G338631  | GRMZM2G338631_P01 | PP2A                                    |
| ZmPP75      | GRMZM2G038195  | GRMZM2G038195_P01 | PP2A                                    |
| ZmPP79      | GRMZM2G108355  | GRMZM2G108355_P01 | PP2A                                    |
| ZmPP81      | GRMZM2G148539  | GRMZM2G148539_P02 | PP2A                                    |
| ZmPP88      | GRMZM2G133464  | GRMZM2G133464_P01 | PP2A                                    |
| ZmPP96      | GRMZM2G390076  | GRMZM2G390076_P02 | PP2A                                    |
| ZmPP98      | GRMZM2G041822  | GRMZM2G041822_P01 | PP2A                                    |
| ZmPP103     | GRMZM5G899390  | GRMZM5G899390_P01 | PP2A                                    |
| ZmPP104     | GRMZM2G126435  | GRMZM2G126435_P01 | PP2A                                    |
| ZmPP119     | GRMZM2G120202  | GRMZM2G120202_P01 | PP2A                                    |
| ZmPP124     | GRMZM2G137286  | GRMZM2G137286_P02 | PP2A                                    |
| ZmPP135     | GRMZM2G016930  | GRMZM2G016930_P01 | PP2A                                    |
| ZmPP136     | GRMZM2G119546  | GRMZM2G119546_P01 | PP2A                                    |
| ZmPP150     | GRMZM2G420926  | GRMZM2G420926_P01 | PP2A                                    |
| ZmPIN1a     | GRMZM2G098643  | GRMZM2G098643_P01 | PIN                                     |
| ZmPIN1b     | GRMZM2G074267  | GRMZM2G074267_P01 | PIN                                     |
| ZmPIN1c     | GRMZM2G149184  | GRMZM2G149184_P01 | PIN                                     |
| ZmPIN1d     | GRMZM2G171702  | GRMZM2G171702_P01 | PIN                                     |
| ZmPIN5a     | GRMZM2G025742  | GRMZM2G025742_P01 | PIN                                     |
| ZmPIN5b     | GRMZM2G148648  | GRMZM2G148648_P01 | PIN                                     |
| ZmPIN5c     | GRMZM2G040911  | GRMZM2G040911_P01 | PIN                                     |
| ZmPIN8      | GRMZM5G839411  | GRMZM5G839411_P01 | PIN                                     |
| ZmPIN9      | GRMZM5G859099  | GRMZM5G859099_P01 | PIN                                     |
| ZmPIN10a    | GRMZM2G126260  | GRMZM2G126260_P02 | PIN                                     |
| ZmPIN10b    | GRMZM2G160496  | GRMZM2G160496_P01 | PIN                                     |
| ZmPINY      | GRMZM2G050089  | GRMZM2G050089_P02 | PIN                                     |
| KZM1        | GRMZM2G178356  | GRMZM2G178356_P01 | K <sup>+</sup> channel                  |
| KZM2        | GRMZM2G093313  | GRMZM2G093313_P02 | K <sup>+</sup> channel                  |
| ZmWOX11     | GRMZM2G170958  | GRMZM2G170958_P01 | WOX                                     |
| ZmRR1       | GRMZM2G040736  | GRMZM2G040736_P01 | cytokinin-inducible response regulators |

|             |                                  |                   |                                         |
|-------------|----------------------------------|-------------------|-----------------------------------------|
| ZmRR2       | GRMZM2G392101                    | GRMZM2G392101_P01 | cytokinin-inducible response regulators |
| ZmARF1      | GRMZM2G169820                    | GRMZM2G169820_P01 | ARF                                     |
| ZmARF2      | GRMZM2G153233                    | GRMZM2G153233_P01 | ARF                                     |
| ZmARF3      | GRMZM2G078274                    | GRMZM2G078274_P01 | ARF                                     |
| ZmARF4      | GRMZM2G034840                    | GRMZM2G034840_P02 | ARF                                     |
| ZmARF5      | GRMZM5G808366                    | GRMZM5G808366_P01 | ARF                                     |
| ZmARF6      | GRMZM2G017187                    | GRMZM2G017187_P02 | ARF                                     |
| ZmARF7      | GRMZM2G475263                    | GRMZM2G475263_P01 | ARF                                     |
| ZmARF9      | GRMZM2G073750                    | GRMZM2G073750_P01 | ARF                                     |
| ZmARF10     | GRMZM2G338259                    | GRMZM2G338259_P02 | ARF                                     |
| ZmARF11     | GRMZM2G056120                    | GRMZM2G056120_P01 | ARF                                     |
| ZmARF12     | GRMZM2G437460                    | GRMZM2G437460_P01 | ARF                                     |
| ZmARF13     | GRMZM2G378580                    | GRMZM2G378580_P01 | ARF                                     |
| ZmARF14     | GRMZM2G702026                    | GRMZM2G702026_P01 | ARF                                     |
| ZmARF15     | GRMZM2G081406                    | GRMZM2G081406_P01 | ARF                                     |
| ZmARF16     | GRMZM2G028980                    | GRMZM2G028980_P01 | ARF                                     |
| ZmARF17     | GRMZM2G159399                    | GRMZM2G159399_P01 | ARF                                     |
| ZmARF18     | GRMZM2G035405                    | GRMZM2G035405_P02 | ARF                                     |
| ZmARF19     | AC207656.3_FG002                 | AC207656.3_FGP002 | ARF                                     |
| ZmARF20     | GRMZM2G102845                    | GRMZM2G102845_P01 | ARF                                     |
| ZmARF21     | GRMZM2G390641                    | GRMZM2G390641_P01 | ARF                                     |
| ZmARF22     | GRMZM2G089640                    | GRMZM2G089640_P01 | ARF                                     |
| ZmARF23     | GRMZM2G441325                    | GRMZM2G441325_P01 | ARF                                     |
| ZmARF24     | GRMZM2G030710                    | GRMZM2G030710_P01 | ARF                                     |
| ZmARF25     | GRMZM2G116557                    | GRMZM2G116557_P03 | ARF                                     |
| ZmARF26     | GRMZM5G874163                    | GRMZM5G874163_P03 | ARF                                     |
| ZmARF27     | GRMZM2G160005                    | GRMZM2G160005_P01 | ARF                                     |
| ZmARF28     | GRMZM2G006042                    | GRMZM2G006042_P02 | ARF                                     |
| ZmARF29     | GRMZM2G086949                    | GRMZM2G086949_P01 | ARF                                     |
| ZmARF30     | GRMZM2G475882                    | GRMZM2G475882_P02 | ARF                                     |
| ZmARF31     | GRMZM2G023813                    | GRMZM2G023813_P01 | ARF                                     |
| <b>Name</b> | <b>Genebank accession number</b> | <b>class</b>      |                                         |
| ZmCrl1      | BG873644                         | Crown rootless1   |                                         |
