# Supplementary material for: Maize protein phosphatase gene family: identification and molecular characterization
Source: PubMed Central journal article supplement (PMC4169795; doi:10.1186/1471-2164-15-773), 2014-09-09
Supplement: 12864_2014_6458_MOESM15_ESM.pdf [file 12864_2014_6458_MOESM15_ESM.pdf]

**Table S5.** List of flowering time signaling components in maize.

| <b>Name</b> | <b>Gene ID</b> | <b>Protein ID</b> | <b>Class</b> |
|-------------|----------------|-------------------|--------------|
| PhyA1       | GRMZM2G157727  | GRMZM2G157727_P02 | PhyA         |
| PhyA2       | GRMZM2G181028  | GRMZM2G181028_P01 | PhyA         |
| PhyB1       | GRMZM2G124532  | GRMZM2G124532_P03 | PhyB         |
| PhyB2       | GRMZM2G092174  | GRMZM2G092174_P01 | PhyB         |
| CRY1        | GRMZM2G024739  | GRMZM2G024739_P01 | CRY          |
| CRY2        | GRMZM2G104262  | GRMZM2G104262_P01 | CRY          |
| ZmCONZ1     | GRMZM2G405368  | GRMZM2G405368_P01 | CO           |
| ZmZCN8      | GRMZM2G179264  | GRMZM2G179264_P01 | FT           |
| GIGZ1A      | GRMZM2G107101  | GRMZM2G107101_P06 | GI           |
| GIGZ1B      | GRMZM5G844173  | GRMZM5G844173_P01 | GI           |
| ZmCCA1      | GRMZM2G014902  | GRMZM2G014902_P01 | clock gene   |
| ZmFKF1b     | GRMZM2G106363  | GRMZM2G106363_P01 | KFK          |
| ZmHD6       | GRMZM5G845755  | GRMZM5G845755_P02 | KFK          |
| ZmLHY1      | GRMZM2G474769  | GRMZM2G474769_P01 | LHY          |
| ZmLHY2      | GRMZM2G014902  | GRMZM2G014902_P01 | LHY          |
| ZmPRR59     | GRMZM2G135446  | GRMZM2G135446_P02 | PPR          |
| ZmPRR73     | GRMZM2G095727  | GRMZM2G095727_P05 | PPR7         |
| ZmTOC1      | GRMZM2G020081  | GRMZM2G020081_P01 | TOC1         |
| ZFL1        | GRMZM2G098813  | GRMZM2G098813_P01 | LFY          |
| ZFL2        | GRMZM2G180190  | GRMZM2G180190_P01 | LFY          |
| ZAP1        | GRMZM2G148693  | GRMZM2G148693_P01 | AP1          |
| GL15        | GRMZM2G160730  | GRMZM2G160730_P02 | AP2          |
| DLF1        | GRMZM2G067921  | GRMZM2G067921_P01 | FD           |
| ZAG1        | GRMZM2G052890  | GRMZM2G052890_P01 | AG           |
| ZAG2        | GRMZM2G160687  | GRMZM2G160687_P03 | AG           |
| silky1      | GRMZM2G139073  | GRMZM2G139073_P01 | AP3          |
| ZMM16       | GRMZM2G110153  | GRMZM2G110153_P01 | PI           |
| ZMM5        | GRMZM2G171365  | GRMZM2G171365_P04 | SOC1/AGL20   |
