# Supplementary material for: Maize protein phosphatase gene family: identification and molecular characterization
Source: PubMed Central journal article supplement (PMC4169795; doi:10.1186/1471-2164-15-773), 2014-09-09
Supplement: 12864_2014_6458_MOESM16_ESM.pdf [file 12864_2014_6458_MOESM16_ESM.pdf]

**Table S6.** List of putative salt stress signaling components in maize.

| Name       | Gene ID          | Protein ID        | Class                                     |
|------------|------------------|-------------------|-------------------------------------------|
| ZmPLC      | GRMZM5G889467    | GRMZM5G889467_P01 | phospholipase C                           |
| ZmPIP2-5   | GRMZM2G178693    | GRMZM2G178693_P01 | diphosphoinositide                        |
| ZmPIP2-4   | GRMZM2G154628    | GRMZM2G154628_P01 | diphosphoinositide                        |
| ZmPIP2-1   | GRMZM2G014914    | GRMZM2G014914_P01 | diphosphoinositide                        |
| ZmPIP2-3   | GRMZM2G125023    | GRMZM2G125023_P01 | diphosphoinositide                        |
| ZmPIP2-2   | GRMZM2G092125    | GRMZM2G092125_P01 | diphosphoinositide                        |
| ZmPIP2-6   | GRMZM2G047368    | GRMZM2G047368_P02 | diphosphoinositide                        |
| ZmPIP2-7   | GRMZM2G081192    | GRMZM2G081192_P01 | diphosphoinositide                        |
| ZmHKT1     | GRMZM2G047616    | GRMZM2G047616_P01 | K <sup>+</sup> /Na <sup>+</sup> symporter |
| ZmSOS1     | GRMZM2G098494    | GRMZM2G098494_P01 | SOS                                       |
| ZmSOS2     | GRMZM2G137569    | GRMZM2G137569_P01 | SOS                                       |
| ZmSOS3     | GRMZM2G137751    | GRMZM2G137751_P01 | SOS                                       |
| VP14       | GRMZM2G014392    | GRMZM2G014392_P01 | NCED                                      |
| P5CS       | GRMZM2G028535    | GRMZM2G028535_P01 | P5C synthetase                            |
| ZmNAC001   | GRMZM2G406204    | GRMZM2G406204_P01 | NAC                                       |
| ZmNAC002   | GRMZM2G025642    | GRMZM2G025642_P01 | NAC                                       |
| ZmNAC003.1 | GRMZM2G059428    | GRMZM2G059428_P01 | NAC                                       |
| ZmNAC003.2 | GRMZM2G059428    | GRMZM2G059428_P03 | NAC                                       |
| ZmNAC004   | GRMZM2G077045    | GRMZM2G077045_P02 | NAC                                       |
| ZmNAC005   | GRMZM2G031001    | GRMZM2G031001_P01 | NAC                                       |
| ZmNAC006   | GRMZM2G011598    | GRMZM2G011598_P01 | NAC                                       |
| ZmNAC007   | GRMZM2G082709    | GRMZM2G082709_P01 | NAC                                       |
| ZmNAC008   | GRMZM2G475014    | GRMZM2G475014_P01 | NAC                                       |
| ZmNAC009.1 | GRMZM2G430522    | GRMZM2G430522_P01 | NAC                                       |
| ZmNAC009.2 | GRMZM2G430522    | GRMZM2G430522_P02 | NAC                                       |
| ZmNAC009.3 | GRMZM2G430522    | GRMZM2G430522_P03 | NAC                                       |
| ZmNAC010.1 | GRMZM2G054252    | GRMZM2G054252_P01 | NAC                                       |
| ZmNAC010.2 | GRMZM2G054252    | GRMZM2G054252_P02 | NAC                                       |
| ZmNAC011   | GRMZM2G340305    | GRMZM2G340305_P01 | NAC                                       |
| ZmNAC012   | GRMZM2G152543    | GRMZM2G152543_P01 | NAC                                       |
| ZmNAC013   | GRMZM2G031120    | GRMZM2G031120_P01 | NAC                                       |
| ZmNAC014   | GRMZM2G163251    | GRMZM2G163251_P01 | NAC                                       |
| ZmNAC015   | GRMZM2G347043    | GRMZM2G347043_P01 | NAC                                       |
| ZmNAC016   | GRMZM2G156977    | GRMZM2G156977_P01 | NAC                                       |
| ZmNAC017.1 | GRMZM2G178998    | GRMZM2G178998_P01 | NAC                                       |
| ZmNAC017.2 | GRMZM2G178998    | GRMZM2G178998_P02 | NAC                                       |
| ZmNAC018   | AC212859.3_FG008 | AC212859.3_FGP008 | NAC                                       |
| ZmNAC019.1 | GRMZM2G176677    | GRMZM2G176677_P01 | NAC                                       |
| ZmNAC019.2 | GRMZM2G176677    | GRMZM2G176677_P04 | NAC                                       |
| ZmNAC020   | GRMZM2G081930    | GRMZM2G081930_P01 | NAC                                       |

---

|            |                  |                   |     |
|------------|------------------|-------------------|-----|
| ZmNAC021   | AC208663.3_FG002 | AC208663.3_FGP002 | NAC |
| ZmNAC022.1 | GRMZM2G450445    | GRMZM2G450445_P01 | NAC |
| ZmNAC022.2 | GRMZM2G450445    | GRMZM2G450445_P02 | NAC |
| ZmNAC023.1 | GRMZM2G009892    | GRMZM2G009892_P01 | NAC |
| ZmNAC023.2 | GRMZM2G009892    | GRMZM2G009892_P04 | NAC |
| ZmNAC024   | GRMZM2G099144    | GRMZM2G099144_P01 | NAC |
| ZmNAC025   | GRMZM2G316840    | GRMZM2G316840_P01 | NAC |
| ZmNAC026   | GRMZM2G018436    | GRMZM2G018436_P01 | NAC |
| ZmNAC027.1 | GRMZM2G162739    | GRMZM2G162739_P01 | NAC |
| ZmNAC027.2 | GRMZM2G162739    | GRMZM2G162739_P02 | NAC |
| ZmNAC028.1 | GRMZM2G008374    | GRMZM2G008374_P01 | NAC |
| ZmNAC028.2 | GRMZM2G008374    | GRMZM2G008374_P02 | NAC |
| ZmNAC029   | GRMZM2G179049    | GRMZM2G179049_P02 | NAC |
| ZmNAC030   | GRMZM5G803888    | GRMZM5G803888_P01 | NAC |
| ZmNAC031   | GRMZM2G166721    | GRMZM2G166721_P01 | NAC |
| ZmNAC032   | GRMZM2G062650    | GRMZM2G062650_P01 | NAC |
| ZmNAC033   | GRMZM2G064541    | GRMZM2G064541_P01 | NAC |
| ZmNAC034   | GRMZM2G114850    | GRMZM2G114850_P01 | NAC |
| ZmNAC035   | GRMZM2G139700    | GRMZM2G139700_P01 | NAC |
| ZmNAC036   | AC203535.4_FG002 | AC203535.4_FGP002 | NAC |
| ZmNAC037   | GRMZM5G813651    | GRMZM5G813651_P01 | NAC |
| ZmNAC038.1 | GRMZM2G014653    | GRMZM2G014653_P01 | NAC |
| ZmNAC038.2 | GRMZM2G014653    | GRMZM2G014653_P03 | NAC |
| ZmNAC039   | GRMZM5G832473    | GRMZM5G832473_P01 | NAC |
| ZmNAC040.1 | GRMZM2G312201    | GRMZM2G312201_P01 | NAC |
| ZmNAC040.2 | GRMZM2G312201    | GRMZM2G312201_P02 | NAC |
| ZmNAC040.3 | GRMZM2G312201    | GRMZM2G312201_P04 | NAC |
| ZmNAC041   | GRMZM2G122615    | GRMZM2G122615_P01 | NAC |
| ZmNAC042   | GRMZM2G058518    | GRMZM2G058518_P01 | NAC |
| ZmNAC043   | GRMZM2G069047    | GRMZM2G069047_P01 | NAC |
| ZmNAC044   | GRMZM2G123246    | GRMZM2G123246_P01 | NAC |
| ZmNAC045   | GRMZM2G100583    | GRMZM2G100583_P01 | NAC |
| ZmNAC046   | GRMZM2G125777    | GRMZM2G125777_P01 | NAC |
| ZmNAC047   | GRMZM2G048826    | GRMZM2G048826_P01 | NAC |
| ZmNAC048   | AC198937.4_FG005 | AC198937.4_FGP005 | NAC |
| ZmNAC049   | GRMZM5G898290    | GRMZM5G898290_P01 | NAC |
| ZmNAC050.1 | GRMZM2G104078    | GRMZM2G104078_P02 | NAC |
| ZmNAC050.2 | GRMZM2G104078    | GRMZM2G104078_P03 | NAC |
| ZmNAC051   | GRMZM2G062009    | GRMZM2G062009_P01 | NAC |
| ZmNAC052   | GRMZM2G354151    | GRMZM2G354151_P01 | NAC |
| ZmNAC053   | GRMZM2G113950    | GRMZM2G113950_P01 | NAC |
| ZmNAC054   | GRMZM2G140901    | GRMZM2G140901_P01 | NAC |
| ZmNAC055   | GRMZM2G439903    | GRMZM2G439903_P01 | NAC |

---

---

|            |               |                   |     |
|------------|---------------|-------------------|-----|
| ZmNAC056.1 | GRMZM2G123667 | GRMZM2G123667_P02 | NAC |
| ZmNAC056.2 | GRMZM2G123667 | GRMZM2G123667_P05 | NAC |
| ZmNAC057.1 | GRMZM2G336533 | GRMZM2G336533_P01 | NAC |
| ZmNAC057.2 | GRMZM2G336533 | GRMZM2G336533_P02 | NAC |
| ZmNAC058.1 | GRMZM2G018553 | GRMZM2G018553_P01 | NAC |
| ZmNAC058.2 | GRMZM2G018553 | GRMZM2G018553_P02 | NAC |
| ZmNAC059   | GRMZM2G112548 | GRMZM2G112548_P01 | NAC |
| ZmNAC060   | GRMZM2G063522 | GRMZM2G063522_P01 | NAC |
| ZmNAC061   | GRMZM2G389557 | GRMZM2G389557_P01 | NAC |
| ZmNAC062   | GRMZM2G155816 | GRMZM2G155816_P01 | NAC |
| ZmNAC063   | GRMZM2G094067 | GRMZM2G094067_P01 | NAC |
| ZmNAC064   | GRMZM2G038073 | GRMZM2G038073_P01 | NAC |
| ZmNAC065   | GRMZM2G315140 | GRMZM2G315140_P01 | NAC |
| ZmNAC066   | GRMZM2G100593 | GRMZM2G100593_P01 | NAC |
| ZmNAC067   | GRMZM5G857701 | GRMZM5G857701_P01 | NAC |
| ZmNAC068   | GRMZM2G052239 | GRMZM2G052239_P01 | NAC |
| ZmNAC069   | GRMZM2G030325 | GRMZM2G030325_P01 | NAC |
| ZmNAC070.1 | GRMZM2G092465 | GRMZM2G092465_P01 | NAC |
| ZmNAC070.2 | GRMZM2G092465 | GRMZM2G092465_P03 | NAC |
| ZmNAC071.1 | GRMZM2G393433 | GRMZM2G393433_P01 | NAC |
| ZmNAC071.2 | GRMZM2G393433 | GRMZM2G393433_P02 | NAC |
| ZmNAC072   | GRMZM2G091490 | GRMZM2G091490_P01 | NAC |
| ZmNAC073   | GRMZM2G074358 | GRMZM2G074358_P01 | NAC |
| ZmNAC074.1 | GRMZM2G041746 | GRMZM2G041746_P01 | NAC |
| ZmNAC074.2 | GRMZM2G041746 | GRMZM2G041746_P02 | NAC |
| ZmNAC075.1 | GRMZM2G027309 | GRMZM2G027309_P01 | NAC |
| ZmNAC075.2 | GRMZM2G027309 | GRMZM2G027309_P02 | NAC |
| ZmNAC076   | GRMZM2G086768 | GRMZM2G086768_P01 | NAC |
| ZmNAC077   | GRMZM2G379608 | GRMZM2G379608_P01 | NAC |
| ZmNAC078   | GRMZM2G078954 | GRMZM2G078954_P01 | NAC |
| ZmNAC079   | GRMZM2G147867 | GRMZM2G147867_P01 | NAC |
| ZmNAC080   | GRMZM2G180328 | GRMZM2G180328_P01 | NAC |
| ZmNAC081   | GRMZM2G456568 | GRMZM2G456568_P01 | NAC |
| ZmNAC082   | GRMZM2G465835 | GRMZM2G465835_P01 | NAC |
| ZmNAC083.1 | GRMZM2G031200 | GRMZM2G031200_P01 | NAC |
| ZmNAC083.2 | GRMZM2G031200 | GRMZM2G031200_P02 | NAC |
| ZmNAC084   | GRMZM2G033014 | GRMZM2G033014_P01 | NAC |
| ZmNAC085   | GRMZM2G479980 | GRMZM2G479980_P01 | NAC |
| ZmNAC086.1 | GRMZM2G079632 | GRMZM2G079632_P01 | NAC |
| ZmNAC086.2 | GRMZM2G079632 | GRMZM2G079632_P02 | NAC |
| ZmNAC087   | GRMZM2G159094 | GRMZM2G159094_P01 | NAC |
| ZmNAC088   | GRMZM2G004531 | GRMZM2G004531_P01 | NAC |
| ZmNAC089.1 | GRMZM2G386163 | GRMZM2G386163_P01 | NAC |

---

---

|            |                  |                   |     |
|------------|------------------|-------------------|-----|
| ZmNAC089.2 | GRMZM2G386163    | GRMZM2G386163_P02 | NAC |
| ZmNAC090.1 | GRMZM2G054277    | GRMZM2G054277_P01 | NAC |
| ZmNAC090.2 | GRMZM2G054277    | GRMZM2G054277_P02 | NAC |
| ZmNAC091   | AC233865.1_FG003 | AC233865.1_FGP003 | NAC |
| ZmNAC092   | GRMZM2G179885    | GRMZM2G179885_P02 | NAC |
| ZmNAC093   | GRMZM2G430849    | GRMZM2G430849_P01 | NAC |
| ZmNAC094   | GRMZM2G181605    | GRMZM2G181605_P01 | NAC |
| ZmNAC095   | GRMZM2G167492    | GRMZM2G167492_P01 | NAC |
| ZmNAC096   | GRMZM2G109627    | GRMZM2G109627_P01 | NAC |
| ZmNAC097.1 | GRMZM2G154182    | GRMZM2G154182_P01 | NAC |
| ZmNAC097.2 | GRMZM2G154182    | GRMZM2G154182_P02 | NAC |
| ZmNAC097.3 | GRMZM2G154182    | GRMZM2G154182_P03 | NAC |
| ZmNAC098   | GRMZM2G342647    | GRMZM2G342647_P01 | NAC |
| ZmNAC099   | GRMZM2G112681    | GRMZM2G112681_P01 | NAC |
| ZmNAC100   | GRMZM2G172264    | GRMZM2G172264_P01 | NAC |
| ZmNAC101   | GRMZM2G104400    | GRMZM2G104400_P01 | NAC |
| ZmNAC102   | GRMZM2G134687    | GRMZM2G134687_P01 | NAC |
| ZmNAC103   | GRMZM2G163843    | GRMZM2G163843_P01 | NAC |
| ZmNAC104   | GRMZM2G163841    | GRMZM2G163841_P01 | NAC |
| ZmNAC105   | GRMZM2G134073    | GRMZM2G134073_P01 | NAC |
| ZmNAC106   | GRMZM2G068973    | GRMZM2G068973_P01 | NAC |
| ZmNAC107   | GRMZM2G171395    | GRMZM2G171395_P01 | NAC |
| ZmNAC108   | GRMZM2G041668    | GRMZM2G041668_P01 | NAC |
| ZmNAC109   | GRMZM2G440219    | GRMZM2G440219_P01 | NAC |
| ZmNAC110   | GRMZM2G459156    | GRMZM2G459156_P01 | NAC |
| ZmNAC111.1 | GRMZM2G163914    | GRMZM2G163914_P02 | NAC |
| ZmNAC111.2 | GRMZM2G163914    | GRMZM2G163914_P03 | NAC |
| ZmNAC112   | GRMZM2G115721    | GRMZM2G115721_P01 | NAC |
| ZmNAC113   | GRMZM2G104074    | GRMZM2G104074_P01 | NAC |
| ZmNAC114   | GRMZM2G042494    | GRMZM2G042494_P01 | NAC |
| ZmNAC115.1 | GRMZM2G159500    | GRMZM2G159500_P01 | NAC |
| ZmNAC115.2 | GRMZM2G159500    | GRMZM2G159500_P02 | NAC |
| ZmNAC116   | GRMZM5G894234    | GRMZM5G894234_P01 | NAC |
| ZmNAC117   | GRMZM2G126817    | GRMZM2G126817_P01 | NAC |
| ZmNAC118   | GRMZM2G174070    | GRMZM2G174070_P01 | NAC |
| ZmNAC119   | GRMZM2G127379    | GRMZM2G127379_P01 | NAC |
| ZmNAC120   | GRMZM2G083347    | GRMZM2G083347_P01 | NAC |
| ZmNAC121   | GRMZM2G167018    | GRMZM2G167018_P01 | NAC |
| ZmNAC122   | GRMZM2G003715    | GRMZM2G003715_P01 | NAC |
| ZmNAC123   | GRMZM2G435824    | GRMZM2G435824_P01 | NAC |
| ZmNAC124   | GRMZM2G111770    | GRMZM2G111770_P01 | NAC |
| ZmNAC125   | GRMZM2G043813    | GRMZM2G043813_P01 | NAC |
| ZmMYB001   | AC217264.3_FG005 | AC217264.3_FGP005 | MYB |

---

---

|          |                  |                   |     |
|----------|------------------|-------------------|-----|
| ZmMYB002 | GRMZM2G024468    | GRMZM2G024468_P01 | MYB |
| ZmMYB003 | GRMZM2G037650    | GRMZM2G037650_P01 | MYB |
| ZmMYB004 | GRMZM2G046443    | GRMZM2G046443_P01 | MYB |
| ZmMYB005 | GRMZM2G054111    | GRMZM2G054111_P01 | MYB |
| ZmMYB006 | GRMZM2G057027    | GRMZM2G057027_P02 | MYB |
| ZmMYB007 | GRMZM2G070849    | GRMZM2G070849_P01 | MYB |
| ZmMYB008 | GRMZM2G077147    | GRMZM2G077147_P01 | MYB |
| ZmMYB009 | GRMZM2G079123    | GRMZM2G079123_P01 | MYB |
| ZmMYB010 | GRMZM2G084583    | GRMZM2G084583_P01 | MYB |
| ZmMYB011 | GRMZM2G084799    | GRMZM2G084799_P01 | MYB |
| ZmMYB012 | GRMZM2G106558    | GRMZM2G106558_P02 | MYB |
| ZmMYB013 | GRMZM2G110135    | GRMZM2G110135_P01 | MYB |
| ZmMYB014 | GRMZM2G121570    | GRMZM2G121570_P01 | MYB |
| ZmMYB015 | GRMZM2G130149    | GRMZM2G130149_P01 | MYB |
| ZmMYB016 | GRMZM2G131937    | GRMZM2G131937_P01 | MYB |
| ZmMYB017 | GRMZM2G143046    | GRMZM2G143046_P01 | MYB |
| ZmMYB018 | GRMZM2G147346    | GRMZM2G147346_P01 | MYB |
| ZmMYB019 | GRMZM2G147698    | GRMZM2G147698_P01 | MYB |
| ZmMYB020 | GRMZM2G308034    | GRMZM2G308034_P01 | MYB |
| ZmMYB021 | GRMZM2G403620    | GRMZM2G403620_P01 | MYB |
| ZmMYB022 | GRMZM2G428555    | GRMZM2G428555_P01 | MYB |
| ZmMYB023 | GRMZM5G870592    | GRMZM5G870592_P01 | MYB |
| ZmMYB024 | AC165178.2_FG004 | AC165178.2_FGP004 | MYB |
| ZmMYB025 | GRMZM2G032655    | GRMZM2G032655_P01 | MYB |
| ZmMYB026 | GRMZM2G038722    | GRMZM2G038722_P01 | MYB |
| ZmMYB027 | GRMZM2G048295    | GRMZM2G048295_P01 | MYB |
| ZmMYB028 | GRMZM2G050305    | GRMZM2G050305_P01 | MYB |
| ZmMYB029 | GRMZM2G064630    | GRMZM2G064630_P01 | MYB |
| ZmMYB030 | GRMZM2G087955    | GRMZM2G087955_P01 | MYB |
| ZmMYB031 | GRMZM2G090837    | GRMZM2G090837_P01 | MYB |
| ZmMYB032 | GRMZM2G105137    | GRMZM2G105137_P01 | MYB |
| ZmMYB033 | GRMZM2G115859    | GRMZM2G115859_P01 | MYB |
| ZmMYB034 | GRMZM2G123202    | GRMZM2G123202_P01 | MYB |
| ZmMYB035 | GRMZM2G124715    | GRMZM2G124715_P01 | MYB |
| ZmMYB036 | GRMZM2G139284    | GRMZM2G139284_P01 | MYB |
| ZmMYB037 | GRMZM2G166337    | GRMZM2G166337_P01 | MYB |
| ZmMYB038 | GRMZM2G176327    | GRMZM2G176327_P01 | MYB |
| ZmMYB039 | GRMZM2G001875    | GRMZM2G001875_P01 | MYB |
| ZmMYB040 | GRMZM2G017520    | GRMZM2G017520_P01 | MYB |
| ZmMYB041 | GRMZM2G041415    | GRMZM2G041415_P01 | MYB |
| ZmMYB042 | GRMZM2G047626    | GRMZM2G047626_P01 | MYB |
| ZmMYB043 | GRMZM2G051256    | GRMZM2G051256_P01 | MYB |
| ZmMYB044 | GRMZM2G052377    | GRMZM2G052377_P01 | MYB |

---

---

|          |               |                   |     |
|----------|---------------|-------------------|-----|
| ZmMYB045 | GRMZM2G064744 | GRMZM2G064744_P01 | MYB |
| ZmMYB046 | GRMZM2G083239 | GRMZM2G083239_P01 | MYB |
| ZmMYB047 | GRMZM2G088783 | GRMZM2G088783_P01 | MYB |
| ZmMYB048 | GRMZM2G111731 | GRMZM2G111731_P01 | MYB |
| ZmMYB049 | GRMZM2G139688 | GRMZM2G139688_P01 | MYB |
| ZmMYB050 | GRMZM2G143328 | GRMZM2G143328_P01 | MYB |
| ZmMYB051 | GRMZM2G158700 | GRMZM2G158700_P01 | MYB |
| ZmMYB052 | GRMZM2G160838 | GRMZM2G160838_P01 | MYB |
| ZmMYB053 | GRMZM2G160840 | GRMZM2G160840_P01 | MYB |
| ZmMYB054 | GRMZM2G162709 | GRMZM2G162709_P01 | MYB |
| ZmMYB055 | GRMZM2G167829 | GRMZM2G167829_P01 | MYB |
| ZmMYB056 | GRMZM2G369799 | GRMZM2G369799_P01 | MYB |
| ZmMYB057 | GRMZM2G460869 | GRMZM2G460869_P01 | MYB |
| ZmMYB058 | GRMZM2G470307 | GRMZM2G470307_P01 | MYB |
| ZmMYB059 | GRMZM5G803355 | GRMZM5G803355_P01 | MYB |
| ZmMYB060 | GRMZM2G011422 | GRMZM2G011422_P01 | MYB |
| ZmMYB061 | GRMZM2G015021 | GRMZM2G015021_P01 | MYB |
| ZmMYB062 | GRMZM2G017268 | GRMZM2G017268_P01 | MYB |
| ZmMYB063 | GRMZM2G043792 | GRMZM2G043792_P01 | MYB |
| ZmMYB064 | GRMZM2G055158 | GRMZM2G055158_P01 | MYB |
| ZmMYB065 | GRMZM2G089244 | GRMZM2G089244_P01 | MYB |
| ZmMYB066 | GRMZM2G108959 | GRMZM2G108959_P01 | MYB |
| ZmMYB067 | GRMZM2G111045 | GRMZM2G111045_P01 | MYB |
| ZmMYB068 | GRMZM2G111117 | GRMZM2G111117_P01 | MYB |
| ZmMYB069 | GRMZM2G127857 | GRMZM2G127857_P01 | MYB |
| ZmMYB070 | GRMZM2G131442 | GRMZM2G131442_P01 | MYB |
| ZmMYB071 | GRMZM2G138427 | GRMZM2G138427_P01 | MYB |
| ZmMYB072 | GRMZM2G162434 | GRMZM2G162434_P01 | MYB |
| ZmMYB073 | GRMZM2G419239 | GRMZM2G419239_P01 | MYB |
| ZmMYB074 | GRMZM2G496770 | GRMZM2G496770_P01 | MYB |
| ZmMYB075 | GRMZM5G833253 | GRMZM5G833253_P01 | MYB |
| ZmMYB076 | GRMZM2G048136 | GRMZM2G048136_P01 | MYB |
| ZmMYB077 | GRMZM2G001223 | GRMZM2G001223_P03 | MYB |
| ZmMYB078 | GRMZM2G027697 | GRMZM2G027697_P01 | MYB |
| ZmMYB079 | GRMZM2G040924 | GRMZM2G040924_P01 | MYB |
| ZmMYB080 | GRMZM2G070523 | GRMZM2G070523_P01 | MYB |
| ZmMYB081 | GRMZM2G073836 | GRMZM2G073836_P01 | MYB |
| ZmMYB082 | GRMZM2G088189 | GRMZM2G088189_P01 | MYB |
| ZmMYB083 | GRMZM2G095904 | GRMZM2G095904_P01 | MYB |
| ZmMYB084 | GRMZM2G104789 | GRMZM2G104789_P01 | MYB |
| ZmMYB085 | GRMZM2G145444 | GRMZM2G145444_P01 | MYB |
| ZmMYB086 | GRMZM2G159547 | GRMZM2G159547_P01 | MYB |
| ZmMYB087 | GRMZM2G161512 | GRMZM2G161512_P01 | MYB |

---

---

|          |                  |                   |     |
|----------|------------------|-------------------|-----|
| ZmMYB088 | GRMZM2G170049    | GRMZM2G170049_P01 | MYB |
| ZmMYB089 | GRMZM2G302549    | GRMZM2G302549_P01 | MYB |
| ZmMYB090 | GRMZM2G455869    | GRMZM2G455869_P01 | MYB |
| ZmMYB091 | GRMZM2G013581    | GRMZM2G013581_P01 | MYB |
| ZmMYB092 | GRMZM2G048910    | GRMZM2G048910_P01 | MYB |
| ZmMYB093 | GRMZM2G069325    | GRMZM2G069325_P02 | MYB |
| ZmMYB094 | GRMZM2G077789    | GRMZM2G077789_P01 | MYB |
| ZmMYB095 | GRMZM2G078820    | GRMZM2G078820_P01 | MYB |
| ZmMYB096 | GRMZM2G093647    | GRMZM2G093647_P01 | MYB |
| ZmMYB097 | GRMZM2G093660    | GRMZM2G093660_P01 | MYB |
| ZmMYB098 | GRMZM2G093789    | GRMZM2G093789_P01 | MYB |
| ZmMYB099 | GRMZM2G102790    | GRMZM2G102790_P01 | MYB |
| ZmMYB100 | GRMZM2G175232    | GRMZM2G175232_P01 | MYB |
| ZmMYB101 | GRMZM2G305856    | GRMZM2G305856_P01 | MYB |
| ZmMYB102 | GRMZM2G343068    | GRMZM2G343068_P01 | MYB |
| ZmMYB103 | GRMZM2G423833    | GRMZM2G423833_P01 | MYB |
| ZmMYB104 | GRMZM2G701063    | GRMZM2G701063_P01 | MYB |
| ZmMYB105 | AC213884.3_FG002 | AC213884.3_FGP002 | MYB |
| ZmMYB106 | GRMZM2G000818    | GRMZM2G000818_P01 | MYB |
| ZmMYB107 | GRMZM2G031323    | GRMZM2G031323_P01 | MYB |
| ZmMYB108 | GRMZM2G045748    | GRMZM2G045748_P01 | MYB |
| ZmMYB109 | GRMZM2G050550    | GRMZM2G050550_P01 | MYB |
| ZmMYB110 | GRMZM2G056407    | GRMZM2G056407_P01 | MYB |
| ZmMYB111 | GRMZM2G104551    | GRMZM2G104551_P01 | MYB |
| ZmMYB112 | GRMZM2G117244    | GRMZM2G117244_P01 | MYB |
| ZmMYB113 | GRMZM2G126566    | GRMZM2G126566_P01 | MYB |
| ZmMYB114 | GRMZM2G150841    | GRMZM2G150841_P01 | MYB |
| ZmMYB115 | GRMZM2G169356    | GRMZM2G169356_P01 | MYB |
| ZmMYB116 | GRMZM2G172327    | GRMZM2G172327_P01 | MYB |
| ZmMYB117 | GRMZM2G003406    | GRMZM2G003406_P01 | MYB |
| ZmMYB118 | GRMZM2G006352    | GRMZM2G006352_P01 | MYB |
| ZmMYB119 | GRMZM2G028054    | GRMZM2G028054_P01 | MYB |
| ZmMYB120 | GRMZM2G047600    | GRMZM2G047600_P01 | MYB |
| ZmMYB121 | GRMZM2G051528    | GRMZM2G051528_P01 | MYB |
| ZmMYB122 | GRMZM2G096358    | GRMZM2G096358_P01 | MYB |
| ZmMYB123 | GRMZM2G119693    | GRMZM2G119693_P01 | MYB |
| ZmMYB124 | GRMZM2G151205    | GRMZM2G151205_P01 | MYB |
| ZmMYB125 | GRMZM2G169316    | GRMZM2G169316_P01 | MYB |
| ZmMYB126 | GRMZM2G171781    | GRMZM2G171781_P01 | MYB |
| ZmMYB127 | GRMZM2G312419    | GRMZM2G312419_P01 | MYB |
| ZmMYB128 | GRMZM2G322490    | GRMZM2G322490_P01 | MYB |
| ZmMYB129 | GRMZM2G330475    | GRMZM2G330475_P01 | MYB |
| ZmMYB130 | GRMZM2G395672    | GRMZM2G395672_P01 | MYB |

---

---

|            |                  |                   |      |
|------------|------------------|-------------------|------|
| ZmMYB131   | GRMZM2G405094    | GRMZM2G405094_P01 | MYB  |
| ZmMYB132   | GRMZM2G431156    | GRMZM2G431156_P01 | MYB  |
| ZmMYB133   | GRMZM2G004090    | GRMZM2G004090_P01 | MYB  |
| ZmMYB134   | GRMZM2G005066    | GRMZM2G005066_P01 | MYB  |
| ZmMYB135   | GRMZM2G022686    | GRMZM2G022686_P01 | MYB  |
| ZmMYB136   | GRMZM2G044824    | GRMZM2G044824_P01 | MYB  |
| ZmMYB137   | GRMZM2G089686    | GRMZM2G089686_P01 | MYB  |
| ZmMYB138   | GRMZM2G098179    | GRMZM2G098179_P01 | MYB  |
| ZmMYB139   | GRMZM2G134279    | GRMZM2G134279_P01 | MYB  |
| ZmMYB140   | GRMZM2G167088    | GRMZM2G167088_P01 | MYB  |
| ZmMYB141   | GRMZM2G416652    | GRMZM2G416652_P01 | MYB  |
| ZmMYB142   | GRMZM5G803308    | GRMZM5G803308_P01 | MYB  |
| ZmMYB143   | AC197146.3_FG002 | AC197146.3_FGP002 | MYB  |
| ZmMYB144   | AC206901.3_FG005 | AC206901.3_FGP005 | MYB  |
| ZmMYB145   | GRMZM2G001824    | GRMZM2G001824_P01 | MYB  |
| ZmMYB146   | GRMZM2G052606    | GRMZM2G052606_P01 | MYB  |
| ZmMYB147   | GRMZM2G081557    | GRMZM2G081557_P01 | MYB  |
| ZmMYB148   | GRMZM2G097636    | GRMZM2G097636_P01 | MYB  |
| ZmMYB149   | GRMZM2G097638    | GRMZM2G097638_P01 | MYB  |
| ZmMYB150   | GRMZM2G127490    | GRMZM2G127490_P01 | MYB  |
| ZmMYB151   | GRMZM2G150680    | GRMZM2G150680_P01 | MYB  |
| ZmMYB152   | GRMZM2G172487    | GRMZM2G172487_P01 | MYB  |
| ZmMYB153   | GRMZM2G172575    | GRMZM2G172575_P01 | MYB  |
| ZmMYB154   | GRMZM2G173633    | GRMZM2G173633_P01 | MYB  |
| ZmMYB155   | GRMZM2G311059    | GRMZM2G311059_P01 | MYB  |
| ZmMYB156   | GRMZM2G325907    | GRMZM2G325907_P01 | MYB  |
| ZmMYB157   | GRMZM2G425427    | GRMZM2G425427_P01 | MYB  |
| ZmMYC1     | GRMZM2G057413    | GRMZM2G057413_P01 | MYC  |
| ZmMYC2     | AC193786.3_FG005 | AC193786.3_FGP005 | MYC  |
| ZmMYC3     | GRMZM2G089501    | GRMZM2G089501_P01 | MYC  |
| ZmMYC4     | GRMZM2G009478    | GRMZM2G009478_P05 | MYC  |
| ZmMYC5     | GRMZM2G317450    | GRMZM2G317450_P03 | MYC  |
| ZmMYC6     | GRMZM2G114444    | GRMZM2G114444_P02 | MYC  |
| ZmMYC7     | GRMZM2G001930    | GRMZM2G001930_P01 | MYC  |
| ZmMYC8     | GRMZM2G049229    | GRMZM2G049229_P01 | MYC  |
| ZmDREB1.10 | GRMZM2G042756    | GRMZM2G042756_P01 | DREB |
| ZmDREB1.2  | GRMZM2G069082    | GRMZM2G069082_P01 | DREB |
| ZmDREB1.3  | GRMZM2G069146    | GRMZM2G069146_P01 | DREB |
| ZmDREB1.4  | GRMZM2G124011    | GRMZM2G124011_P01 | DREB |
| ZmDREB1.5  | GRMZM2G069126    | GRMZM2G069126_P01 | DREB |
| ZmDREB1.6  | GRMZM2G175856    | GRMZM2G175856_P01 | DREB |
| ZmDREB1.7  | GRMZM2G380377    | GRMZM2G380377_P01 | DREB |
| ZmDREB1.8  | GRMZM2G097182    | GRMZM2G097182_P01 | DREB |

---



---

|                  |                  |                   |                         |
|------------------|------------------|-------------------|-------------------------|
| ZmDREB1.9        | GRMZM2G137341    | GRMZM2G137341_P01 | DREB                    |
| ZmDREB1.1/1A     | GRMZM2G124037    | GRMZM2G124037_P01 | DREB                    |
| ZmDREB2.2        | AC209257.4_FG006 | AC209257.4_FGP006 | DREB                    |
| ZmDREB2.3/ZmABI4 | GRMZM2G093595    | GRMZM2G093595_P01 | DREB                    |
| ZmDREB2.4        | GRMZM2G419901    | GRMZM2G419901_P01 | DREB                    |
| ZmDREB2.5        | GRMZM2G376255    | GRMZM2G376255_P01 | DREB                    |
| ZmDREB2.6        | GRMZM2G399098    | GRMZM2G399098_P01 | DREB                    |
| ZmDREB2.7        | GRMZM2G028386    | GRMZM2G028386_P01 | DREB                    |
| ZmDREB2.8        | GRMZM2G156737    | GRMZM2G156737_P01 | DREB                    |
| ZmDREB2.1/2A     | GRMZM2G006745    | GRMZM2G006745_P01 | DREB                    |
| ZmDREB2-19       | GRMZM2G323172    | GRMZM2G323172_P01 | DREB                    |
| ZmDREB2-20       | GRMZM2G348307    | GRMZM2G348307_P01 | DREB                    |
| GRMZM2G106921    | GRMZM2G106921    | GRMZM2G106921_P01 | SLAC1 anion channel     |
| GRMZM2G331393    | GRMZM2G331393    | GRMZM2G331393_P01 | SLAC1 anion channel     |
| GRMZM2G518198    | GRMZM2G518198    | GRMZM2G518198_P01 | SLAC1 anion channel     |
| GRMZM2G362163    | GRMZM2G362163    | GRMZM2G362163_P01 | SLAC1 anion channel     |
| GRMZM2G074540    | GRMZM2G074540    | GRMZM2G074540_P01 | SLAC1 anion channel     |
| GRMZM2G080887    | GRMZM2G080887    | GRMZM2G080887_P01 | SLAC1 anion channel     |
| GRMZM2G061469    | GRMZM2G061469    | GRMZM2G061469_P01 | SLAC1 anion channel     |
| GRMZM2G134628    | GRMZM2G134628    | GRMZM2G134628_P01 | SLAC1 anion channel     |
| GRMZM2G059453    | GRMZM2G059453    | GRMZM2G059453_P01 | SLAC1 anion channel     |
| GRMZM2G308615    | GRMZM2G308615    | GRMZM2G308615_P01 | SLAC1 anion channel     |
| GRMZM2G122228    | GRMZM2G122228    | GRMZM2G122228_P01 | SLAC1 anion channel     |
| KZM1             | GRMZM2G178356    | GRMZM2G178356_P01 | K <sup>+</sup> channel  |
| KZM2             | GRMZM2G093313    | GRMZM2G093313_P02 | K <sup>+</sup> channel  |
| ZmRbohA          | GRMZM2G089291    | GRMZM2G089291_P01 | NADPH oxidase           |
| ZmRbohB          | GRMZM2G448185    | GRMZM2G448185_P01 | NADPH oxidase           |
| ZmRbohC          | GRMZM2G065144    | GRMZM2G065144_P01 | NADPH oxidase           |
| ZmRbohD          | GRMZM2G358619    | GRMZM2G358619_P01 | NADPH oxidase           |
| ZmRbohE          | GRMZM2G037993    | GRMZM2G037993_P01 | NADPH oxidase           |
| ZmRbohF          | GRMZM2G034896    | GRMZM2G034896_P01 | NADPH oxidase           |
| ZmRbohG          | GRMZM2G401179    | GRMZM2G401179_P01 | NADPH oxidase           |
| ZmRbohH          | GRMZM2G426953    | GRMZM2G426953_P01 | NADPH oxidase           |
| ZmRbohI          | GRMZM2G138152    | GRMZM2G138152_P02 | NADPH oxidase           |
| ZmRbohJ          | GRMZM2G441541    | GRMZM2G441541_P02 | NADPH oxidase           |
| ZmRbohK          | GRMZM2G043435    | GRMZM2G043435_P01 | NADPH oxidase           |
| ZmRbohL          | GRMZM2G147966    | GRMZM2G147966_P01 | NADPH oxidase           |
| ZmRbohM          | GRMZM2G022547    | GRMZM2G022547_P02 | NADPH oxidase           |
| ZmRbohN          | GRMZM2G323731    | GRMZM2G323731_P01 | NADPH oxidase           |
| ZmRbohO          | GRMZM2G300965    | GRMZM2G300965_P01 | NADPH oxidase           |
| ZmA1             | GRMZM2G008122    | GRMZM2G008122_P01 | V-H <sup>+</sup> ATPase |
| ZmA2             | GRMZM2G068259    | GRMZM2G068259_P01 | V-H <sup>+</sup> ATPase |
| ZmA3             | GRMZM2G019404    | GRMZM2G019404_P01 | V-H <sup>+</sup> ATPase |

---

---

|               |                  |                   |                         |
|---------------|------------------|-------------------|-------------------------|
| ZmA4          | GRMZM2G144821    | GRMZM2G144821_P01 | V-H <sup>+</sup> ATPase |
| ZmA5          | GRMZM2G035520    | GRMZM2G035520_P01 | V-H <sup>+</sup> ATPase |
| ZmA6          | GRMZM2G341058    | GRMZM2G341058_P01 | V-H <sup>+</sup> ATPase |
| ZmA7          | GRMZM2G148374    | GRMZM2G148374_P01 | V-H <sup>+</sup> ATPase |
| ZmA8          | AC209050.3_FG001 | AC209050.3_FGP001 | V-H <sup>+</sup> ATPase |
| ZmA9          | GRMZM2G104325    | GRMZM2G104325_P01 | V-H <sup>+</sup> ATPase |
| ZmA10         | GRMZM2G455557    | GRMZM2G455557_P01 | V-H <sup>+</sup> ATPase |
| ZmA11         | GRMZM2G131309    | GRMZM2G131309_P01 | V-H <sup>+</sup> ATPase |
| ZmA12         | GRMZM2G006894    | GRMZM2G006894_P01 | V-H <sup>+</sup> ATPase |
| ZmSnRK2.1     | GRMZM2G180916    | GRMZM2G180916_P04 | SnRK2                   |
| ZmSnRK2.2     | GRMZM2G081915    | GRMZM2G081915_P02 | SnRK2                   |
| ZmSnRK2.3     | GRMZM2G138861    | GRMZM2G138861_P04 | SnRK2                   |
| ZmSnRK2.4     | GRMZM2G155593    | GRMZM2G155593_P01 | SnRK2                   |
| ZmSnRK2.5     | GRMZM2G110922    | GRMZM2G110922_P01 | SnRK2                   |
| ZmSnRK2.6     | GRMZM2G130018    | GRMZM2G130018_P01 | SnRK2                   |
| ZmSnRK2.7     | GRMZM2G171435    | GRMZM2G171435_P01 | SnRK2                   |
| ZmSnRK2.8     | GRMZM2G066867    | GRMZM2G066867_P01 | SnRK2                   |
| ZmSnRK2.9     | GRMZM2G000278    | GRMZM2G000278_P03 | SnRK2                   |
| ZmSnRK2.10    | GRMZM2G063961    | GRMZM2G063961_P01 | SnRK2                   |
| ZmSnRK2.11    | GRMZM2G056732    | GRMZM2G056732_P02 | SnRK2                   |
| ZmSnRK2.12    | GRMZM2G334791    | GRMZM2G334791_P03 | SnRK2                   |
| ZmSnRK2.13    | GRMZM2G035809    | GRMZM2G035809_P01 | SnRK2                   |
| ZmSnRK2.14    | GRMZM2G110908    | GRMZM2G110908_P01 | SnRK2                   |
| GRMZM2G120517 | GRMZM2G120517    | GRMZM2G120517_P02 | APX                     |
| GRMZM2G460406 | GRMZM2G460406    | GRMZM2G460406_P01 | APX                     |
| GRMZM2G006791 | GRMZM2G006791    | GRMZM2G006791_P04 | APX                     |
| GRMZM2G140667 | GRMZM2G140667    | GRMZM2G140667_P01 | APX                     |
| GRMZM2G004211 | GRMZM2G004211    | GRMZM2G004211_P01 | APX                     |
| GRMZM2G137839 | GRMZM2G137839    | GRMZM2G137839_P01 | APX                     |
| GRMZM2G054300 | GRMZM2G054300    | GRMZM2G054300_P04 | APX                     |
| GRMZM2G014397 | GRMZM2G014397    | GRMZM2G014397_P03 | APX                     |
| ZmbZIP1       | GRMZM2G428184    | GRMZM2G428184_P01 | bZIP                    |
| ZmbZIP2       | GRMZM2G157177    | GRMZM2G157177_P01 | bZIP                    |
| ZmbZIP3       | GRMZM2G038015    | GRMZM2G038015_P01 | bZIP                    |
| ZmbZIP4       | GRMZM2G174284    | GRMZM2G174284_P01 | bZIP                    |
| ZmbZIP5       | GRMZM2G062391    | GRMZM2G062391_P01 | bZIP                    |
| ZmbZIP6       | GRMZM2G353553    | GRMZM2G353553_P01 | bZIP                    |
| ZmbZIP7       | GRMZM2G093020    | GRMZM2G093020_P02 | bZIP                    |
| ZmbZIP8       | GRMZM2G479885    | GRMZM2G479885_P01 | bZIP                    |
| ZmbZIP9.1     | GRMZM2G073427    | GRMZM2G073427_P04 | bZIP                    |
| ZmbZIP9.2     | GRMZM2G073427    | GRMZM2G073427_P02 | bZIP                    |
| ZmbZIP9.3     | GRMZM2G073427    | GRMZM2G073427_P03 | bZIP                    |
| ZmbZIP9.4     | GRMZM2G073427    | GRMZM2G073427_P07 | bZIP                    |

---

---

|            |                  |                   |      |
|------------|------------------|-------------------|------|
| ZmbZIP10   | GRMZM2G370026    | GRMZM2G370026_P01 | bZIP |
| ZmbZIP11   | AC186606.4_FG003 | AC186606.4_FGP003 | bZIP |
| ZmbZIP12   | GRMZM2G332294    | GRMZM2G332294_P01 | bZIP |
| ZmbZIP13   | GRMZM2G175280    | GRMZM2G175280_P01 | bZIP |
| ZmbZIP14   | GRMZM2G478417    | GRMZM2G478417_P01 | bZIP |
| ZmbZIP15   | GRMZM2G177046    | GRMZM2G177046_P01 | bZIP |
| ZmbZIP16.1 | GRMZM2G019446    | GRMZM2G019446_P02 | bZIP |
| ZmbZIP16.2 | GRMZM2G019446    | GRMZM2G019446_P01 | bZIP |
| ZmbZIP17   | GRMZM2G016150    | GRMZM2G016150_P01 | bZIP |
| ZmbZIP18.1 | GRMZM2G131961    | GRMZM2G131961_P01 | bZIP |
| ZmbZIP18.2 | GRMZM2G131961    | GRMZM2G131961_P03 | bZIP |
| ZmbZIP18.3 | GRMZM2G131961    | GRMZM2G131961_P05 | bZIP |
| ZmbZIP19.1 | GRMZM2G112483    | GRMZM2G112483_P01 | bZIP |
| ZmbZIP19.2 | GRMZM2G112483    | GRMZM2G112483_P02 | bZIP |
| ZmbZIP20.1 | GRMZM5G821024    | GRMZM5G821024_P01 | bZIP |
| ZmbZIP20.2 | GRMZM5G821024    | GRMZM5G821024_P02 | bZIP |
| ZmbZIP21.1 | GRMZM2G171370    | GRMZM2G171370_P03 | bZIP |
| ZmbZIP21.2 | GRMZM2G171370    | GRMZM2G171370_P01 | bZIP |
| ZmbZIP22   | AC203957.3_FG004 | AC203957.3_FGP004 | bZIP |
| ZmbZIP23   | GRMZM2G002075    | GRMZM2G002075_P01 | bZIP |
| ZmbZIP24   | GRMZM2G137532    | GRMZM2G137532_P01 | bZIP |
| ZmbZIP25   | GRMZM2G125934    | GRMZM2G125934_P01 | bZIP |
| ZmbZIP26   | GRMZM2G180847    | GRMZM2G180847_P01 | bZIP |
| ZmbZIP27   | GRMZM2G037910    | GRMZM2G037910_P01 | bZIP |
| ZmbZIP28   | GRMZM2G060109    | GRMZM2G060109_P01 | bZIP |
| ZmbZIP29   | GRMZM2G166566    | GRMZM2G166566_P01 | bZIP |
| ZmbZIP30   | AC233853.1_FG002 | AC233853.1_FGP002 | bZIP |
| ZmbZIP31   | GRMZM2G039828    | GRMZM2G039828_P01 | bZIP |
| ZmbZIP32   | GRMZM2G160136    | GRMZM2G160136_P02 | bZIP |
| ZmbZIP33   | GRMZM2G074373    | GRMZM2G074373_P01 | bZIP |
| ZmbZIP34   | GRMZM2G160902    | GRMZM2G160902_P01 | bZIP |
| ZmbZIP35   | GRMZM2G024851    | GRMZM2G024851_P01 | bZIP |
| ZmbZIP36.1 | GRMZM2G146020    | GRMZM2G146020_P01 | bZIP |
| ZmbZIP36.2 | GRMZM2G146020    | GRMZM2G146020_P02 | bZIP |
| ZmbZIP37.1 | GRMZM5G858197    | GRMZM5G858197_P02 | bZIP |
| ZmbZIP37.2 | GRMZM5G858197    | GRMZM5G858197_P03 | bZIP |
| ZmbZIP38.1 | GRMZM2G060216    | GRMZM2G060216_P01 | bZIP |
| ZmbZIP38.2 | GRMZM2G060216    | GRMZM2G060216_P02 | bZIP |
| ZmbZIP39   | GRMZM2G159134    | GRMZM2G159134_P02 | bZIP |
| ZmbZIP40.1 | GRMZM2G019907    | GRMZM2G019907_P02 | bZIP |
| ZmbZIP40.2 | GRMZM2G019907    | GRMZM2G019907_P03 | bZIP |
| ZmbZIP41   | GRMZM2G027976    | GRMZM2G027976_P01 | bZIP |
| ZmbZIP42   | GRMZM5G848942    | GRMZM5G848942_P01 | bZIP |

---

---

|            |                  |                   |      |
|------------|------------------|-------------------|------|
| ZmbZIP43   | GRMZM2G117851    | GRMZM2G117851_P01 | bZIP |
| ZmbZIP44   | GRMZM2G368491    | GRMZM2G368491_P01 | bZIP |
| ZmbZIP45   | GRMZM2G120167    | GRMZM2G120167_P01 | bZIP |
| ZmbZIP46.1 | GRMZM2G157722    | GRMZM2G157722_P02 | bZIP |
| ZmbZIP46.2 | GRMZM2G157722    | GRMZM2G157722_P01 | bZIP |
| ZmbZIP47   | GRMZM2G118870    | GRMZM2G118870_P01 | bZIP |
| ZmbZIP48   | GRMZM2G380897    | GRMZM2G380897_P01 | bZIP |
| ZmbZIP49   | GRMZM2G122846    | GRMZM2G122846_P01 | bZIP |
| ZmbZIP50   | GRMZM2G030877    | GRMZM2G030877_P01 | bZIP |
| ZmbZIP51   | GRMZM2G011119    | GRMZM2G011119_P01 | bZIP |
| ZmbZIP52   | AC190609.3_FG001 | AC190609.3_FGP001 | bZIP |
| ZmbZIP53   | GRMZM2G149150    | GRMZM2G149150_P01 | bZIP |
| ZmbZIP54   | GRMZM2G144480    | GRMZM2G144480_P01 | bZIP |
| ZmbZIP55   | GRMZM2G079365    | GRMZM2G079365_P01 | bZIP |
| ZmbZIP56   | GRMZM2G052102    | GRMZM2G052102_P01 | bZIP |
| ZmbZIP57   | GRMZM2G336766    | GRMZM2G336766_P01 | bZIP |
| ZmbZIP58   | GRMZM2G019106    | GRMZM2G019106_P01 | bZIP |
| ZmbZIP59   | GRMZM2G361611    | GRMZM2G361611_P01 | bZIP |
| ZmbZIP60.1 | GRMZM2G007063    | GRMZM2G007063_P01 | bZIP |
| ZmbZIP60.2 | GRMZM2G007063    | GRMZM2G007063_P04 | bZIP |
| ZmbZIP61   | GRMZM2G386273    | GRMZM2G386273_P01 | bZIP |
| ZmbZIP62.1 | GRMZM2G000171    | GRMZM2G000171_P02 | bZIP |
| ZmbZIP62.2 | GRMZM2G000171    | GRMZM2G000171_P01 | bZIP |
| ZmbZIP63   | GRMZM2G153144    | GRMZM2G153144_P01 | bZIP |
| ZmbZIP64   | GRMZM2G444748    | GRMZM2G444748_P01 | bZIP |
| ZmbZIP65.1 | GRMZM2G098904    | GRMZM2G098904_P01 | bZIP |
| ZmbZIP65.2 | GRMZM2G098904    | GRMZM2G098904_P02 | bZIP |
| ZmbZIP66   | GRMZM2G080111    | GRMZM2G080111_P01 | bZIP |
| ZmbZIP67   | GRMZM2G137046    | GRMZM2G137046_P01 | bZIP |
| ZmbZIP68   | GRMZM2G029979    | GRMZM2G029979_P01 | bZIP |
| ZmbZIP69   | GRMZM2G158313    | GRMZM2G158313_P01 | bZIP |
| ZmbZIP70   | GRMZM2G092609    | GRMZM2G092609_P01 | bZIP |
| ZmbZIP71   | GRMZM2G111504    | GRMZM2G111504_P01 | bZIP |
| ZmbZIP72   | GRMZM2G020799    | GRMZM2G020799_P01 | bZIP |
| ZmbZIP73   | GRMZM2G073892    | GRMZM2G073892_P01 | bZIP |
| ZmbZIP74   | GRMZM2G448607    | GRMZM2G448607_P01 | bZIP |
| ZmbZIP75   | GRMZM2G402862    | GRMZM2G402862_P01 | bZIP |
| ZmbZIP76   | GRMZM2G055413    | GRMZM2G055413_P01 | bZIP |
| ZmbZIP77.1 | GRMZM2G133331    | GRMZM2G133331_P01 | bZIP |
| ZmbZIP77.2 | GRMZM2G133331    | GRMZM2G133331_P02 | bZIP |
| ZmbZIP77.3 | GRMZM2G133331    | GRMZM2G133331_P03 | bZIP |
| ZmbZIP78   | GRMZM2G396632    | GRMZM2G396632_P01 | bZIP |
| ZmbZIP79.1 | GRMZM2G045236    | GRMZM2G045236_P01 | bZIP |

---

---

|             |                  |                   |      |
|-------------|------------------|-------------------|------|
| ZmbZIP79.2  | GRMZM2G045236    | GRMZM2G045236_P02 | bZIP |
| ZmbZIP80.1  | GRMZM2G000842    | GRMZM2G000842_P01 | bZIP |
| ZmbZIP80.2  | GRMZM2G000842    | GRMZM2G000842_P02 | bZIP |
| ZmbZIP80.3  | GRMZM2G000842    | GRMZM2G000842_P03 | bZIP |
| ZmbZIP81.1  | GRMZM2G129247    | GRMZM2G129247_P02 | bZIP |
| ZmbZIP81.2  | GRMZM2G129247    | GRMZM2G129247_P03 | bZIP |
| ZmbZIP82    | GRMZM2G175870    | GRMZM2G175870_P01 | bZIP |
| ZmbZIP83.1  | GRMZM2G011932    | GRMZM2G011932_P01 | bZIP |
| ZmbZIP83.2  | GRMZM2G011932    | GRMZM2G011932_P04 | bZIP |
| ZmbZIP84    | GRMZM2G438652    | GRMZM2G438652_P01 | bZIP |
| ZmbZIP85.1  | GRMZM2G015534    | GRMZM2G015534_P02 | bZIP |
| ZmbZIP85.2  | GRMZM2G015534    | GRMZM2G015534_P01 | bZIP |
| ZmbZIP85.3  | GRMZM2G015534    | GRMZM2G015534_P03 | bZIP |
| ZmbZIP86.1  | GRMZM2G095078    | GRMZM2G095078_P01 | bZIP |
| ZmbZIP86.2  | GRMZM2G095078    | GRMZM2G095078_P02 | bZIP |
| ZmbZIP87    | GRMZM2G092137    | GRMZM2G092137_P01 | bZIP |
| ZmbZIP88    | GRMZM2G358796    | GRMZM2G358796_P01 | bZIP |
| ZmbZIP89.1  | GRMZM2G006578    | GRMZM2G006578_P01 | bZIP |
| ZmbZIP89.2  | GRMZM2G006578    | GRMZM2G006578_P02 | bZIP |
| ZmbZIP89.3  | GRMZM2G006578    | GRMZM2G006578_P03 | bZIP |
| ZmbZIP90    | AC200057.4_FG007 | AC200057.4_FGP007 | bZIP |
| ZmbZIP91    | GRMZM2G043600    | GRMZM2G043600_P01 | bZIP |
| ZmbZIP92    | GRMZM2G149040    | GRMZM2G149040_P01 | bZIP |
| ZmbZIP93.1  | GRMZM2G361847    | GRMZM2G361847_P04 | bZIP |
| ZmbZIP93.2  | GRMZM2G361847    | GRMZM2G361847_P01 | bZIP |
| ZmbZIP93.3  | GRMZM2G361847    | GRMZM2G361847_P02 | bZIP |
| ZmbZIP93.4  | GRMZM2G361847    | GRMZM2G361847_P07 | bZIP |
| ZmbZIP94    | GRMZM2G077124    | GRMZM2G077124_P03 | bZIP |
| ZmbZIP95    | GRMZM2G067921    | GRMZM2G067921_P01 | bZIP |
| ZmbZIP96.1  | GRMZM2G030280    | GRMZM2G030280_P01 | bZIP |
| ZmbZIP96.2  | GRMZM2G030280    | GRMZM2G030280_P02 | bZIP |
| ZmbZIP97.1  | GRMZM2G171912    | GRMZM2G171912_P01 | bZIP |
| ZmbZIP97.2  | GRMZM2G171912    | GRMZM2G171912_P02 | bZIP |
| ZmbZIP98    | GRMZM2G132868    | GRMZM2G132868_P01 | bZIP |
| ZmbZIP99    | GRMZM2G161009    | GRMZM2G161009_P01 | bZIP |
| ZmbZIP100.1 | GRMZM2G080731    | GRMZM2G080731_P01 | bZIP |
| ZmbZIP100.2 | GRMZM2G080731    | GRMZM2G080731_P02 | bZIP |
| ZmbZIP100.3 | GRMZM2G080731    | GRMZM2G080731_P03 | bZIP |
| ZmbZIP101.1 | GRMZM2G033230    | GRMZM2G033230_P01 | bZIP |
| ZmbZIP101.2 | GRMZM2G033230    | GRMZM2G033230_P02 | bZIP |
| ZmbZIP102   | GRMZM2G438293    | GRMZM2G438293_P01 | bZIP |
| ZmbZIP103   | AC232238.2_FG004 | AC232238.2_FGP004 | bZIP |
| ZmbZIP104   | GRMZM2G168079    | GRMZM2G168079_P01 | bZIP |

---

---

|             |               |                   |      |
|-------------|---------------|-------------------|------|
| ZmbZIP105   | GRMZM2G125243 | GRMZM2G125243_P01 | bZIP |
| ZmbZIP106.1 | GRMZM2G170079 | GRMZM2G170079_P02 | bZIP |
| ZmbZIP106.2 | GRMZM2G170079 | GRMZM2G170079_P01 | bZIP |
| ZmbZIP107   | GRMZM2G033413 | GRMZM2G033413_P01 | bZIP |
| ZmbZIP108   | GRMZM2G140355 | GRMZM2G140355_P01 | bZIP |
| ZmbZIP109   | GRMZM2G407631 | GRMZM2G407631_P01 | bZIP |
| ZmbZIP110.1 | GRMZM2G025812 | GRMZM2G025812_P01 | bZIP |
| ZmbZIP110.2 | GRMZM2G025812 | GRMZM2G025812_P02 | bZIP |
| ZmbZIP111   | GRMZM2G060290 | GRMZM2G060290_P01 | bZIP |
| ZmbZIP112.1 | GRMZM2G103647 | GRMZM2G103647_P03 | bZIP |
| ZmbZIP112.2 | GRMZM2G103647 | GRMZM2G103647_P01 | bZIP |
| ZmbZIP113   | GRMZM2G151295 | GRMZM2G151295_P02 | bZIP |
| ZmbZIP114.1 | GRMZM2G056099 | GRMZM2G056099_P01 | bZIP |
| ZmbZIP114.2 | GRMZM2G056099 | GRMZM2G056099_P02 | bZIP |
| ZmbZIP115   | GRMZM2G066734 | GRMZM2G066734_P01 | bZIP |
| ZmbZIP116   | GRMZM2G473274 | GRMZM2G473274_P01 | bZIP |
| ZmbZIP117   | GRMZM2G366264 | GRMZM2G366264_P01 | bZIP |
| ZmbZIP118   | GRMZM2G365754 | GRMZM2G365754_P01 | bZIP |
| ZmbZIP119.1 | GRMZM2G136266 | GRMZM2G136266_P01 | bZIP |
| ZmbZIP119.2 | GRMZM2G136266 | GRMZM2G136266_P02 | bZIP |
| ZmbZIP120   | GRMZM2G088140 | GRMZM2G088140_P02 | bZIP |
| ZmbZIP121   | GRMZM2G094352 | GRMZM2G094352_P01 | bZIP |
| ZmbZIP122   | GRMZM5G884349 | GRMZM5G884349_P01 | bZIP |
| ZmbZIP123.1 | GRMZM2G425920 | GRMZM2G425920_P01 | bZIP |
| ZmbZIP123.2 | GRMZM2G425920 | GRMZM2G425920_P02 | bZIP |
| ZmbZIP124   | GRMZM2G358701 | GRMZM2G358701_P01 | bZIP |
| ZmbZIP125.1 | GRMZM2G445575 | GRMZM2G445575_P01 | bZIP |
| ZmbZIP125.2 | GRMZM2G445575 | GRMZM2G445575_P02 | bZIP |
| ZmbZIP125.3 | GRMZM2G445575 | GRMZM2G445575_P03 | bZIP |
| ZmWRKY1     | GRMZM2G030272 | GRMZM2G030272_P01 | WRKY |
| ZmWRKY2     | GRMZM2G425430 | GRMZM2G425430_P01 | WRKY |
| ZmWRKY3     | GRMZM2G383594 | GRMZM2G383594_P01 | WRKY |
| ZmWRKY4     | GRMZM2G130374 | GRMZM2G130374_P01 | WRKY |
| ZmWRKY5     | GRMZM2G324999 | GRMZM2G324999_P01 | WRKY |
| ZmWRKY6     | GRMZM2G070211 | GRMZM2G070211_P01 | WRKY |
| ZmWRKY7     | GRMZM2G149219 | GRMZM2G149219_P01 | WRKY |
| ZmWRKY8     | GRMZM2G018487 | GRMZM2G018487_P01 | WRKY |
| ZmWRKY9.1   | GRMZM2G143204 | GRMZM2G143204_P01 | WRKY |
| ZmWRKY9.2   | GRMZM2G143204 | GRMZM2G143204_P02 | WRKY |
| ZmWRKY10    | GRMZM2G008029 | GRMZM2G008029_P01 | WRKY |
| ZmWRKY11    | GRMZM2G164082 | GRMZM2G164082_P01 | WRKY |
| ZmWRKY12    | GRMZM2G083717 | GRMZM2G083717_P01 | WRKY |
| ZmWRKY13.1  | GRMZM2G071907 | GRMZM2G071907_P03 | WRKY |

---

---

|            |                  |                   |      |
|------------|------------------|-------------------|------|
| ZmWRKY13.2 | GRMZM2G071907    | GRMZM2G071907_P01 | WRKY |
| ZmWRKY14   | GRMZM2G024898    | GRMZM2G024898_P01 | WRKY |
| ZmWRKY15.1 | GRMZM2G123387    | GRMZM2G123387_P01 | WRKY |
| ZmWRKY15.2 | GRMZM2G123387    | GRMZM2G123387_P02 | WRKY |
| ZmWRKY16   | GRMZM5G816457    | GRMZM5G816457_P01 | WRKY |
| ZmWRKY17   | GRMZM2G102583    | GRMZM2G102583_P02 | WRKY |
| ZmWRKY18   | GRMZM2G400559    | GRMZM2G400559_P01 | WRKY |
| ZmWRKY19   | GRMZM2G099593    | GRMZM2G099593_P01 | WRKY |
| ZmWRKY20   | GRMZM2G163418    | GRMZM2G163418_P01 | WRKY |
| ZmWRKY21   | GRMZM2G057011    | GRMZM2G057011_P01 | WRKY |
| ZmWRKY22   | GRMZM2G052671    | GRMZM2G052671_P01 | WRKY |
| ZmWRKY23   | GRMZM2G130854    | GRMZM2G130854_P01 | WRKY |
| ZmWRKY24   | GRMZM2G106560    | GRMZM2G106560_P01 | WRKY |
| ZmWRKY25.1 | GRMZM5G871347    | GRMZM5G871347_P01 | WRKY |
| ZmWRKY25.2 | GRMZM5G871347    | GRMZM5G871347_P02 | WRKY |
| ZmWRKY25.3 | GRMZM5G871347    | GRMZM5G871347_P03 | WRKY |
| ZmWRKY26   | GRMZM2G475984    | GRMZM2G475984_P01 | WRKY |
| ZmWRKY27   | GRMZM2G176489    | GRMZM2G176489_P01 | WRKY |
| ZmWRKY28   | GRMZM2G151444    | GRMZM2G151444_P01 | WRKY |
| ZmWRKY29   | GRMZM2G327349    | GRMZM2G327349_P01 | WRKY |
| ZmWRKY30   | GRMZM2G173680    | GRMZM2G173680_P01 | WRKY |
| ZmWRKY31   | GRMZM2G076657    | GRMZM2G076657_P01 | WRKY |
| ZmWRKY32   | AC165171.2_FG002 | AC165171.2_FGP002 | WRKY |
| ZmWRKY33   | GRMZM2G148087    | GRMZM2G148087_P01 | WRKY |
| ZmWRKY34   | GRMZM2G059562    | GRMZM2G059562_P01 | WRKY |
| ZmWRKY35   | GRMZM2G158328    | GRMZM2G158328_P01 | WRKY |
| ZmWRKY36   | GRMZM2G065290    | GRMZM2G065290_P01 | WRKY |
| ZmWRKY37   | GRMZM2G382350    | GRMZM2G382350_P01 | WRKY |
| ZmWRKY38.1 | GRMZM2G141299    | GRMZM2G141299_P02 | WRKY |
| ZmWRKY38.2 | GRMZM2G141299    | GRMZM2G141299_P01 | WRKY |
| ZmWRKY39   | GRMZM2G040298    | GRMZM2G040298_P01 | WRKY |
| ZmWRKY40   | GRMZM2G101405    | GRMZM2G101405_P01 | WRKY |
| ZmWRKY41   | GRMZM2G151763    | GRMZM2G151763_P01 | WRKY |
| ZmWRKY42   | GRMZM2G408462    | GRMZM2G408462_P01 | WRKY |
| ZmWRKY43   | AC198725.4_FG009 | AC198725.4_FGP009 | WRKY |
| ZmWRKY44   | GRMZM2G105140    | GRMZM2G105140_P01 | WRKY |
| ZmWRKY45   | GRMZM2G354384    | GRMZM2G354384_P01 | WRKY |
| ZmWRKY46   | GRMZM2G054125    | GRMZM2G054125_P01 | WRKY |
| ZmWRKY47   | GRMZM2G549512    | GRMZM2G549512_P01 | WRKY |
| ZmWRKY48   | GRMZM2G148561    | GRMZM2G148561_P01 | WRKY |
| ZmWRKY49   | AC205562.3_FG002 | AC205562.3_FGP002 | WRKY |
| ZmWRKY50   | GRMZM2G377217    | GRMZM2G377217_P01 | WRKY |
| ZmWRKY51   | GRMZM2G138683    | GRMZM2G138683_P01 | WRKY |

---

---

|            |                  |                   |      |
|------------|------------------|-------------------|------|
| ZmWRKY52   | GRMZM2G063216    | GRMZM2G063216_P01 | WRKY |
| ZmWRKY53   | GRMZM2G451035    | GRMZM2G451035_P01 | WRKY |
| ZmWRKY54   | GRMZM2G461648    | GRMZM2G461648_P01 | WRKY |
| ZmWRKY55   | GRMZM2G169564    | GRMZM2G169564_P01 | WRKY |
| ZmWRKY56   | GRMZM2G027972    | GRMZM2G027972_P01 | WRKY |
| ZmWRKY57   | GRMZM2G038158    | GRMZM2G038158_P01 | WRKY |
| ZmWRKY58   | GRMZM2G147880    | GRMZM2G147880_P01 | WRKY |
| ZmWRKY59   | GRMZM2G161411    | GRMZM2G161411_P01 | WRKY |
| ZmWRKY60   | GRMZM5G880069    | GRMZM5G880069_P02 | WRKY |
| ZmWRKY61   | GRMZM2G120320    | GRMZM2G120320_P01 | WRKY |
| ZmWRKY62   | GRMZM2G048450    | GRMZM2G048450_P01 | WRKY |
| ZmWRKY63   | GRMZM2G073272    | GRMZM2G073272_P01 | WRKY |
| ZmWRKY64   | GRMZM5G823157    | GRMZM5G823157_P01 | WRKY |
| ZmWRKY65   | GRMZM2G143765    | GRMZM2G143765_P01 | WRKY |
| ZmWRKY66   | AC209050.3_FG003 | AC209050.3_FGP003 | WRKY |
| ZmWRKY67   | GRMZM2G156529    | GRMZM2G156529_P01 | WRKY |
| ZmWRKY68.1 | GRMZM2G163054    | GRMZM2G163054_P04 | WRKY |
| ZmWRKY68.2 | GRMZM2G163054    | GRMZM2G163054_P02 | WRKY |
| ZmWRKY69   | GRMZM2G127064    | GRMZM2G127064_P01 | WRKY |
| ZmWRKY70.1 | GRMZM2G012724    | GRMZM2G012724_P01 | WRKY |
| ZmWRKY70.2 | GRMZM2G012724    | GRMZM2G012724_P03 | WRKY |
| ZmWRKY70.3 | GRMZM2G012724    | GRMZM2G012724_P04 | WRKY |
| ZmWRKY71   | GRMZM2G169966    | GRMZM2G169966_P01 | WRKY |
| ZmWRKY72   | GRMZM2G401521    | GRMZM2G401521_P01 | WRKY |
| ZmWRKY73   | GRMZM5G863420    | GRMZM5G863420_P01 | WRKY |
| ZmWRKY74   | GRMZM2G453571    | GRMZM2G453571_P01 | WRKY |
| ZmWRKY75.1 | GRMZM2G366795    | GRMZM2G366795_P01 | WRKY |
| ZmWRKY75.2 | GRMZM2G366795    | GRMZM2G366795_P02 | WRKY |
| ZmWRKY76   | GRMZM2G018721    | GRMZM2G018721_P01 | WRKY |
| ZmWRKY77   | GRMZM2G139815    | GRMZM2G139815_P01 | WRKY |
| ZmWRKY78   | GRMZM2G025895    | GRMZM2G025895_P01 | WRKY |
| ZmWRKY79.1 | GRMZM2G125653    | GRMZM2G125653_P01 | WRKY |
| ZmWRKY79.2 | GRMZM2G125653    | GRMZM2G125653_P02 | WRKY |
| ZmWRKY80   | GRMZM2G169149    | GRMZM2G169149_P01 | WRKY |
| ZmWRKY81.1 | GRMZM2G151407    | GRMZM2G151407_P01 | WRKY |
| ZmWRKY81.2 | GRMZM2G151407    | GRMZM2G151407_P02 | WRKY |
| ZmWRKY82.1 | GRMZM2G398506    | GRMZM2G398506_P01 | WRKY |
| ZmWRKY82.2 | GRMZM2G398506    | GRMZM2G398506_P02 | WRKY |
| ZmWRKY83   | GRMZM2G381378    | GRMZM2G381378_P01 | WRKY |
| ZmWRKY84   | GRMZM2G006497    | GRMZM2G006497_P01 | WRKY |
| ZmWRKY85   | GRMZM2G516301    | GRMZM2G516301_P01 | WRKY |
| ZmWRKY86   | GRMZM2G083350    | GRMZM2G083350_P01 | WRKY |
| ZmWRKY87   | GRMZM2G448605    | GRMZM2G448605_P01 | WRKY |

---



---

|             |                  |                   |      |
|-------------|------------------|-------------------|------|
| ZmWRKY88    | GRMZM2G063880    | GRMZM2G063880_P01 | WRKY |
| ZmWRKY89    | GRMZM2G414315    | GRMZM2G414315_P01 | WRKY |
| ZmWRKY90    | GRMZM2G057116    | GRMZM2G057116_P01 | WRKY |
| ZmWRKY91    | GRMZM2G061408    | GRMZM2G061408_P01 | WRKY |
| ZmWRKY92.1  | GRMZM2G449681    | GRMZM2G449681_P01 | WRKY |
| ZmWRKY92.2  | GRMZM2G449681    | GRMZM2G449681_P02 | WRKY |
| ZmWRKY93    | GRMZM2G034421    | GRMZM2G034421_P01 | WRKY |
| ZmWRKY94    | GRMZM2G432583    | GRMZM2G432583_P01 | WRKY |
| ZmWRKY95    | GRMZM2G015433    | GRMZM2G015433_P01 | WRKY |
| ZmWRKY96    | GRMZM2G137802    | GRMZM2G137802_P01 | WRKY |
| ZmWRKY97    | GRMZM2G304573    | GRMZM2G304573_P01 | WRKY |
| ZmWRKY98    | GRMZM2G149683    | GRMZM2G149683_P01 | WRKY |
| ZmWRKY99    | GRMZM2G145554    | GRMZM2G145554_P01 | WRKY |
| ZmWRKY100   | GRMZM2G411766    | GRMZM2G411766_P01 | WRKY |
| ZmWRKY101   | GRMZM5G812272    | GRMZM5G812272_P02 | WRKY |
| ZmWRKY102   | GRMZM2G045560    | GRMZM2G045560_P01 | WRKY |
| ZmWRKY103   | GRMZM2G036703    | GRMZM2G036703_P01 | WRKY |
| ZmWRKY104   | GRMZM2G029282    | GRMZM2G029282_P01 | WRKY |
| ZmWRKY105   | GRMZM2G029292    | GRMZM2G029292_P03 | WRKY |
| ZmWRKY106   | GRMZM2G013391    | GRMZM2G013391_P01 | WRKY |
| ZmWRKY107   | GRMZM2G111354    | GRMZM2G111354_P01 | WRKY |
| ZmWRKY108   | GRMZM2G003551    | GRMZM2G003551_P01 | WRKY |
| ZmWRKY109   | GRMZM2G111711    | GRMZM2G111711_P01 | WRKY |
| ZmWRKY110.1 | GRMZM2G171428    | GRMZM2G171428_P01 | WRKY |
| ZmWRKY110.2 | GRMZM2G171428    | GRMZM2G171428_P02 | WRKY |
| ZmWRKY111   | GRMZM2G060918    | GRMZM2G060918_P01 | WRKY |
| ZmWRKY112   | GRMZM2G005207    | GRMZM2G005207_P01 | WRKY |
| ZmWRKY113   | GRMZM2G441031    | GRMZM2G441031_P01 | WRKY |
| ZmWRKY114   | GRMZM2G090594    | GRMZM2G090594_P01 | WRKY |
| ZmWRKY115   | GRMZM2G004060    | GRMZM2G004060_P01 | WRKY |
| ZmWRKY116.1 | GRMZM2G020254    | GRMZM2G020254_P01 | WRKY |
| ZmWRKY116.2 | GRMZM2G020254    | GRMZM2G020254_P02 | WRKY |
| ZmWRKY116.3 | GRMZM2G020254    | GRMZM2G020254_P03 | WRKY |
| ZmWRKY117   | GRMZM2G031963    | GRMZM2G031963_P01 | WRKY |
| ZmWRKY118   | AC208110.2_FG001 | AC208110.2_FGP001 | WRKY |
| ZmSIMK1     | GRMZM2G127141    | GRMZM2G127141_P01 | MAPK |
| ZmMPK2      | GRMZM2G123886    | GRMZM2G123886_P01 | MAPK |
| ZmMPK3      | GRMZM2G017792    | GRMZM2G017792_P01 | MAPK |
| ZmMPK4      | GRMZM2G053987    | GRMZM2G053987_P02 | MAPK |
| ZmMPK5      | GRMZM2G020216    | GRMZM2G020216_P01 | MAPK |
| ZmMPK6      | GRMZM2G089484    | GRMZM2G089484_P01 | MAPK |
| ZmMPK7      | GRMZM2G002100    | GRMZM2G002100_P01 | MAPK |
| ZmMPK8      | GRMZM2G048455    | GRMZM2G048455_P01 | MAPK |

---

---

|          |                  |                   |                                             |
|----------|------------------|-------------------|---------------------------------------------|
| ZmMPK9   | GRMZM2G062914    | GRMZM2G062914_P01 | MAPK                                        |
| ZmMPK10  | GRMZM2G034052    | GRMZM2G034052_P01 | MAPK                                        |
| ZmMPK11  | GRMZM2G163861    | GRMZM2G163861_P01 | MAPK                                        |
| ZmMPK12  | GRMZM2G131334    | GRMZM2G131334_P02 | MAPK                                        |
| ZmMPK13  | GRMZM2G122335    | GRMZM2G122335_P01 | MAPK                                        |
| ZmMPK14  | GRMZM2G007848    | GRMZM2G007848_P01 | MAPK                                        |
| ZmMPK15  | GRMZM2G135904    | GRMZM2G135904_P02 | MAPK                                        |
| ZmMPK17  | GRMZM2G374088    | GRMZM2G374088_P01 | MAPK                                        |
| ZmMPK16  | GRMZM2G306028    | GRMZM2G306028_P02 | MAPK                                        |
| ZmMPK18  | GRMZM2G375975    | GRMZM2G375975_P01 | MAPK                                        |
| ZmMPK19  | GRMZM2G062761    | GRMZM2G062761_P01 | MAPK                                        |
| ZmRACR1  | GRMZM2G063882    | GRMZM2G063882_P01 | ABA receptor                                |
| ZmRACR2  | GRMZM2G048733    | GRMZM2G048733_P02 | ABA receptor                                |
| ZmRACR3  | GRMZM2G405064    | GRMZM2G405064_P01 | ABA receptor                                |
| ZmRACR4  | GRMZM2G165567    | GRMZM2G165567_P02 | ABA receptor                                |
| ZmRACR5  | GRMZM2G133631    | GRMZM2G133631_P01 | ABA receptor                                |
| ZmRACR6  | GRMZM2G144224    | GRMZM2G144224_P01 | ABA receptor                                |
| ZmRACR7  | GRMZM2G057959    | GRMZM2G057959_P01 | ABA receptor                                |
| ZmRACR8  | GRMZM2G047677    | GRMZM2G047677_P01 | ABA receptor                                |
| ZmRACR9  | GRMZM2G169695    | GRMZM2G169695_P01 | ABA receptor                                |
| ZmRACR10 | GRMZM2G141382    | GRMZM2G141382_P01 | ABA receptor                                |
| ZmRACR11 | GRMZM2G134731    | GRMZM2G134731_P01 | ABA receptor                                |
| ZmRACR12 | AC194914.3_FG002 | AC194914.3_FGP002 | ABA receptor                                |
| ZmRACR13 | GRMZM2G154987    | GRMZM2G154987_P01 | ABA receptor                                |
| ZmPP6    | GRMZM2G010855    | GRMZM2G010855_P01 | PP2CA                                       |
| ZmPP31   | GRMZM2G019819    | GRMZM2G019819_P01 | PP2CA                                       |
| ZmPP39   | GRMZM2G082487    | GRMZM2G082487_P01 | PP2CA                                       |
| ZmPP53   | GRMZM2G059453    | GRMZM2G059453_P01 | PP2CA                                       |
| ZmPP56   | GRMZM2G122228    | GRMZM2G122228_P01 | PP2CA                                       |
| ZmPP57   | GRMZM2G134628    | GRMZM2G134628_P01 | PP2CA                                       |
| ZmPP107  | GRMZM2G177386    | GRMZM2G177386_P02 | PP2CA                                       |
| ZmPP108  | GRMZM2G102255    | GRMZM2G102255_P01 | PP2CA                                       |
| ZmPP112  | GRMZM2G308615    | GRMZM2G308615_P01 | PP2CA                                       |
| ZmPP121  | GRMZM5G818101    | GRMZM5G818101_P02 | PP2CA                                       |
| ZmPP123  | GRMZM2G383807    | GRMZM2G383807_P01 | PP2CA                                       |
| ZmPP127  | GRMZM2G001243    | GRMZM2G001243_P01 | PP2CA                                       |
| ZmPP130  | GRMZM2G300125    | GRMZM2G300125_P01 | PP2CA                                       |
| ZmPP132  | GRMZM2G166297    | GRMZM2G166297_P01 | PP2CA                                       |
| ZmPP134  | GRMZM2G149132    | GRMZM2G149132_P01 | PP2CA                                       |
| ZmCAX1   | GRMZM5G809587    | GRMZM5G809587_P03 | Ca <sup>2+</sup> /H <sup>+</sup> antiporter |
| ZmNHX1   | GRMZM2G027851    | GRMZM2G027851_P01 | Na <sup>+</sup> /H <sup>+</sup> antiporters |
| ZmNHX3   | GRMZM2G063492    | GRMZM2G063492_P01 | Na <sup>+</sup> /H <sup>+</sup> antiporters |
| ZmNHX4   | GRMZM2G037342    | GRMZM2G037342_P02 | Na <sup>+</sup> /H <sup>+</sup> antiporters |

---
