# Supplementary material for: Maize protein phosphatase gene family: identification and molecular characterization
Source: PubMed Central journal article supplement (PMC4169795; doi:10.1186/1471-2164-15-773), 2014-09-09
Supplement: 12864_2014_6458_MOESM17_ESM.pdf [file 12864_2014_6458_MOESM17_ESM.pdf]

**Table S7.** List of expression values of MAPK cascade-related genes and key genes of ABA biosynthesis in maize under salt stress.

Values in red and blue indicate the fold increase and decrease in expression in the salt-stressed tissue, respectively.

| Name              | CR        | Name              | PR       | Name              | SR       |
|-------------------|-----------|-------------------|----------|-------------------|----------|
| <i>ZmMPK3</i>     | 0.822793  | <i>ZmMPK10</i>    | 0.647817 | <i>ZmMPK3</i>     | 0.708986 |
| <i>ZmMPK12</i>    | 0.357354  | <i>ZmMPK19</i>    | 0.561517 | <i>ZmMPK12</i>    | 0.470683 |
| <i>ZmMPK6</i>     | 0.194932  | <i>ZmMPK12</i>    | 0.429276 | <i>ZmMPK19</i>    | 0.457447 |
| <i>ZmMPK10</i>    | 0.1521    | <i>ZmMPK14</i>    | 0.168414 | <i>ZmMPK10</i>    | 0.235054 |
| <i>ZmMPK19</i>    | 0.045185  | <i>ZmMPK6</i>     | 0.121254 | <i>ZmMPK14</i>    | 0.206726 |
| <i>ZmMPK5</i>     | 0.019545  | <i>ZmMPK5</i>     | 0.063902 | <i>ZmMPK5</i>     | 0.140035 |
| <i>ZmMPK14</i>    | -0.646976 | <i>ZmMPK3</i>     | -0.12557 | <i>ZmMPK6</i>     | 0.116234 |
| <i>ZmMPK15</i>    | -0.043352 | <i>ZmMPK15</i>    | -0.00074 | <i>ZmMPK15</i>    | 0.058608 |
| <i>ZmMKK3</i>     | 0.295163  | <i>ZmMKK6</i>     | 0.073743 | <i>ZmMKK3</i>     | 0.309055 |
| <i>ZmMKK2</i>     | 0.23363   | <i>ZmMKK3</i>     | 0.072793 | <i>ZmMEK1</i>     | 0.203611 |
| <i>ZmMEK1</i>     | 0.061768  | <i>ZmMKK2</i>     | -0.49017 | <i>ZmMKK6</i>     | -0.35159 |
| <i>ZmMKK4</i>     | -0.100245 | <i>ZmMKK4</i>     | -0.22838 | <i>ZmMKK4</i>     | -0.29101 |
| <i>ZmMKK6</i>     | -0.068771 | <i>ZmMEK1</i>     | -0.06204 | <i>ZmMKK2</i>     | -0.23234 |
| <i>ZmRaf46</i>    | 1.723257  | <i>ZmRaf7</i>     | 0.665914 | <i>ZmRaf46</i>    | 0.708986 |
| <i>ZmRaf49</i>    | 0.522887  | <i>ZmRaf9</i>     | 0.61962  | <i>ZmRaf38</i>    | 0.688227 |
| <i>ZmRaf17</i>    | 0.489666  | <i>ZmMAPKKK23</i> | 0.563037 | <i>ZmRaf22</i>    | 0.615876 |
| <i>ZmZIK1</i>     | 0.481284  | <i>ZmRaf17</i>    | 0.45472  | <i>ZmMAPKKK20</i> | 0.509677 |
| <i>ZmRaf13</i>    | 0.412917  | <i>ZmMAPKKK15</i> | 0.356586 | <i>ZmRaf14</i>    | 0.468325 |
| <i>ZmMAPKKK24</i> | 0.357299  | <i>ZmRaf44</i>    | 0.351311 | <i>ZmRaf17</i>    | 0.364337 |
| <i>ZmRaf29</i>    | 0.251636  | <i>ZmRaf26</i>    | 0.304118 | <i>ZmRaf49</i>    | 0.359836 |
| <i>ZmRaf42</i>    | 0.225757  | <i>ZmZIK1</i>     | 0.289472 | <i>ZmRaf2</i>     | 0.317156 |
| <i>ZmRaf2</i>     | 0.222063  | <i>ZmRaf21</i>    | 0.256853 | <i>ZmZIK9</i>     | 0.309055 |
| <i>ZmRaf6</i>     | 0.21511   | <i>ZmRaf38</i>    | 0.2022   | <i>ZmRaf45</i>    | 0.270865 |
| <i>ZmRaf38</i>    | 0.206936  | <i>ZmRaf45</i>    | 0.196267 | <i>ZmRaf34</i>    | 0.270848 |
| <i>ZmZIK8</i>     | 0.156216  | <i>ZmRaf4</i>     | 0.184819 | <i>ZmRaf48</i>    | 0.250996 |
| <i>ZmRaf40</i>    | 0.149522  | <i>ZmMAPKKK24</i> | 0.184298 | <i>ZmRaf20</i>    | 0.235054 |
| <i>ZmRaf45</i>    | 0.147065  | <i>ZmRaf39</i>    | 0.180887 | <i>ZmRaf40</i>    | 0.204681 |
| <i>ZmZIK9</i>     | 0.144721  | <i>ZmZIK4</i>     | 0.180555 | <i>ZmMAPKKK24</i> | 0.187526 |
| <i>ZmRaf39</i>    | 0.144457  | <i>ZmMAPKKK22</i> | 0.16116  | <i>ZmRaf6</i>     | 0.182238 |
| <i>ZmMAPKKK22</i> | 0.13976   | <i>ZmRaf47</i>    | 0.149353 | <i>ZmZIK8</i>     | 0.139748 |
| <i>ZmRaf4</i>     | 0.089579  | <i>ZmZIK8</i>     | 0.138994 | <i>ZmMAPKKK6</i>  | 0.13803  |
| <i>ZmMAPKKK18</i> | 0.076894  | <i>ZmRaf6</i>     | 0.137945 | <i>ZmZIK2</i>     | 0.117451 |
| <i>ZmRaf21</i>    | 0.045185  | <i>ZmZIK2</i>     | 0.135086 | <i>ZmRaf21</i>    | 0.10381  |
| <i>ZmMAPKKK8</i>  | -1.443101 | <i>ZmRaf40</i>    | 0.128827 | <i>ZmRaf13</i>    | 0.057993 |
| <i>ZmMAPKKK17</i> | -0.902347 | <i>ZmRaf13</i>    | 0.117398 | <i>ZmMAPKKK22</i> | 0.056682 |
| <i>ZmMAPKKK6</i>  | -0.774243 | <i>ZmRaf33</i>    | 0.116382 | <i>ZmMAPKKK18</i> | 0.04417  |

|            |           |            |          |            |          |
|------------|-----------|------------|----------|------------|----------|
| ZmRaf9     | -0.420478 | ZmRaf19    | 0.113501 | ZmZIK5     | 0.029736 |
| ZmRaf44    | -0.417989 | ZmRaf29    | 0.111473 | ZmMAPKKK17 | 0.028604 |
| ZmRaf22    | -0.350744 | ZmRaf20    | 0.10382  | ZmRaf27    | 0.028604 |
| ZmMAPKKK13 | -0.333327 | ZmZIK9     | 0.09909  | ZmRaf39    | 0.023301 |
| ZmRaf18    | -0.324572 | ZmRaf31    | 0.081921 | ZmRaf30    | 0.020168 |
| ZmRaf30    | -0.269089 | ZmRaf1     | 0.03149  | ZmRaf44    | 0.009014 |
| ZmRaf1     | -0.266017 | ZmRaf14    | 0.028571 | ZmRaf33    | 0.003729 |
| ZmMAPKKK20 | -0.234923 | ZmRaf48    | 0.027705 | ZmMAPKKK13 | -        |
| ZmRaf7     | -0.232349 | ZmMAPKKK6  | -        | ZmMAPKKK8  | -0.53048 |
| ZmZIK2     | -0.222437 | ZmMAPKKK8  | -        | ZmMAPKKK23 | -0.44302 |
| ZmRaf48    | -0.15198  | ZmMAPKKK13 | -        | ZmZIK4     | -0.41591 |
| ZmMAPKKK16 | -0.150539 | ZmRaf46    | -        | ZmRaf4     | -0.39835 |
| ZmZIK6     | -0.14746  | ZmRaf22    | -0.93292 | ZmRaf42    | -0.37688 |
| ZmZIK4     | -0.145863 | ZmZIK6     | -0.54388 | ZmMAPKKK26 | -0.32475 |
| ZmRaf14    | -0.110733 | ZmMAPKKK17 | -0.47349 | ZmRaf47    | -0.27901 |
| ZmMAPKKK15 | -0.110093 | ZmRaf36    | -0.43696 | ZmRaf18    | -0.27591 |
| ZmRaf31    | -0.107585 | ZmRaf18    | -0.42769 | ZmRaf1     | -0.2752  |
| ZmRaf20    | -0.106818 | ZmMAPKKK20 | -0.38038 | ZmRaf7     | -0.26502 |
| ZmRaf47    | -0.099313 | ZmRaf30    | -0.20554 | ZmMAPKKK16 | -0.2111  |
| ZmZIK5     | -0.093262 | ZmMAPKKK18 | -0.20388 | ZmRaf26    | -0.1979  |
| ZmRaf19    | -0.086059 | ZmRaf27    | -0.17056 | ZmRaf9     | -0.16548 |
| ZmMAPKKK26 | -0.053923 | ZmRaf49    | -0.14272 | ZmRaf19    | -0.1349  |
| ZmRaf34    | -0.049244 | ZmMAPKKK16 | -0.13752 | ZmRaf29    | -0.12752 |
| ZmRaf33    | -0.027419 | ZmMAPKKK26 | -0.08037 | ZmMAPKKK15 | -0.11544 |
| ZmRaf26    | -0.025204 | ZmRaf2     | -0.06872 | ZmZIK1     | -0.02798 |
| ZmMAPKKK23 | -0.021929 | ZmRaf42    | -0.05845 | ZmZIK6     | -0.02798 |
| ZmRaf36    | -0.016215 | ZmRaf34    | -0.03906 | ZmRaf36    | -0.02798 |
| ZmRaf27    | -0.008586 | ZmZIK5     | -0.00084 | ZmRaf31    | -0.02798 |
| ZmMAP4K5   | 0.765077  | ZmMAP4K2   | 0.349206 | ZmMAP4K6   | 0.637601 |
| ZmMAP4K2   | 0.091728  | ZmMAP4K1   | 0.063227 | ZmMAP4K2   | 0.486593 |
| ZmMIK      | -0.112356 | ZmMAP4K5   | -0.13862 | ZmMAP4K1   | 0.198905 |
| ZmMAP4K3   | -0.026965 | ZmMIK      | -0.12884 | ZmMIK      | 0.0739   |
| ZmMAP4K1   | -0.009263 | ZmMAP4K3   | -0.02808 | ZmMAP4K3   | 0.035214 |
| ZmMAP4K6   | -0.007282 | ZmMAP4K6   | -0.02283 | ZmMAP4K5   | -0.66025 |
| VP14       | 2.17522   | VP14       | -        | VP14       | 3.252038 |
| ZmAO2      | 0.827522  | ZmAO2      | 0.398593 | ZmAO2      | 1.070303 |
| ZmAO1      | 0.158123  | ZmAO1      | 0.2668   | ZmAO1      | 0.285491 |
