# Supplementary material for: Maize protein phosphatase gene family: identification and molecular characterization
Source: PubMed Central journal article supplement (PMC4169795; doi:10.1186/1471-2164-15-773), 2014-09-09
Supplement: 12864_2014_6458_MOESM18_ESM.pdf [file 12864_2014_6458_MOESM18_ESM.pdf]

**Table S8.** List of FPKM values of *ZmPPs* in maize reproductive (cob) and vegetative tissue (leaf) under both drought and well-watered conditions.

MCC and MCD stand for maize ovary, well watered and drought, respectively; MLC and MLD stand for maize basal leaf meristem, well watered and drought, respectively.

Numbers 1 and 2 indicate the two biological replicates.

The extent of differential expression is measured in terms of fold change and (-) indicates failure to calculate or undetected values.

Values in red and blue indicate the fold increase and decrease in expression in the drought-stressed tissue, respectively.

| Name           | MLC-1    | MLC-2    | MLD-1    | MLD-2   | leaf    | Name           | MCC-1   | MCC-2   | MCD-1   | MCD-2   | cob     |
|----------------|----------|----------|----------|---------|---------|----------------|---------|---------|---------|---------|---------|
| <i>ZmPP130</i> | 0.185674 | 0.066071 | 1.33133  | 1.90762 | 12.866  | <i>ZmPP56</i>  | 1.04451 | 1.28581 | 24.9423 | 31.9753 | 24.4248 |
| <i>ZmPP154</i> | 1.59809  | 0.376698 | 5.761    | 9.98914 | 7.97561 | <i>ZmPP67</i>  | 5.21057 | 5.2209  | 43.7203 | 71.5037 | 11.0458 |
| <i>ZmPP113</i> | 0.484378 | 0.196986 | 1.38925  | 3.95152 | 7.83835 | <i>ZmPP107</i> | 38.1802 | 36.5708 | 339.674 | 361.27  | 9.37705 |
| <i>ZmPP146</i> | 2.24921  | 0.515408 | 10.2968  | 10.6892 | 7.59092 | <i>ZmPP112</i> | 3.64398 | 4.16687 | 31.5676 | 37.0921 | 8.7903  |
| <i>ZmPP31</i>  | 0.20963  | 0.111677 | 0.562482 | 1.0729  | 5.08978 | <i>ZmPP39</i>  | 5.27084 | 7.3829  | 45.4388 | 54.5162 | 7.89925 |
| <i>ZmPP124</i> | 3.66464  | 3.72866  | 18.0225  | 18.5982 | 4.95323 | <i>ZmPP154</i> | 3.20284 | 5.04657 | 28.3206 | 36.5484 | 7.86347 |
| <i>ZmPP29</i>  | 12.0032  | 7.26424  | 35.0496  | 32.4684 | 3.50425 | <i>ZmPP130</i> | 1.46837 | 1.72438 | 11.0961 | 12.7946 | 7.4828  |
| <i>ZmPP21</i>  | 7.75276  | 10.1622  | 25.9208  | 24.897  | 2.83661 | <i>ZmPP6</i>   | 30.6439 | 19.3653 | 166.999 | 156.819 | 6.47517 |
| <i>ZmPP6</i>   | 13.2422  | 5.96945  | 21.988   | 27.9786 | 2.60085 | <i>ZmPP114</i> | 9.05156 | 6.6742  | 33.1996 | 32.6189 | 4.18539 |
| <i>ZmPP127</i> | 12.2224  | 11.8801  | 27.1083  | 24.6031 | 2.14548 | <i>ZmPP158</i> | 20.75   | 18.8583 | 72.6705 | 78.1879 | 3.80876 |
| <i>ZmPP90</i>  | 5.35336  | 6.43224  | 11.443   | 11.6782 | 1.96182 | <i>ZmPP127</i> | 48.0534 | 56.6635 | 188.154 | 205.834 | 3.76241 |
| <i>ZmPP57</i>  | 18.5235  | 14.0137  | 28.2524  | 33.7509 | 1.90561 | <i>ZmPP57</i>  | 58.579  | 60.7115 | 213.385 | 220.639 | 3.63838 |
| <i>ZmPP67</i>  | 4.97823  | 3.87003  | 8.73824  | 7.97337 | 1.88869 | <i>ZmPP82</i>  | 9.19464 | 5.35317 | 22.591  | 29.4821 | 3.57945 |
| <i>ZmPP149</i> | 2.63842  | 3.26649  | 5.97417  | 4.75183 | 1.81645 | <i>ZmPP53</i>  | 11.0058 | 13.8623 | 39.2616 | 44.3019 | 3.36027 |
| <i>ZmPP74</i>  | 11.3371  | 18.6391  | 30.1931  | 24.2148 | 1.81504 | <i>ZmPP132</i> | 26.0031 | 34.0162 | 84.9169 | 98.3847 | 3.05404 |
| <i>ZmPP9</i>   | 1.72638  | 1.41624  | 2.81897  | 2.45387 | 1.67785 | <i>ZmPP8</i>   | 11.1297 | 5.09641 | 24.3144 | 23.8146 | 2.96615 |
| <i>ZmPP119</i> | 2.00781  | 1.28805  | 2.83876  | 2.52035 | 1.62601 | <i>ZmPP89</i>  | 50.3389 | 44.629  | 119.561 | 152.385 | 2.86356 |
| <i>ZmPP129</i> | 1.60432  | 0.887178 | 1.72336  | 2.29755 | 1.61385 | <i>ZmPP27</i>  | 10.5591 | 11.0851 | 28.757  | 32.5497 | 2.83248 |
| <i>ZmPP53</i>  | 19.9122  | 12.6392  | 26.7656  | 25.6849 | 1.61131 | <i>ZmPP152</i> | 9.9546  | 6.04288 | 23.1463 | 22.1456 | 2.83119 |
| <i>ZmPP80</i>  | 6.73822  | 6.83238  | 10.5571  | 10.8681 | 1.5788  | <i>ZmPP76</i>  | 91.2057 | 77.4417 | 225.877 | 242.135 | 2.77509 |
| <i>ZmPP147</i> | 12.4116  | 16.1198  | 23.7318  | 21.1765 | 1.574   | <i>ZmPP102</i> | 22.5061 | 17.6575 | 70.2547 | 37.3971 | 2.68033 |
| <i>ZmPP66</i>  | 4.98943  | 3.14712  | 6.31716  | 6.33883 | 1.55545 | <i>ZmPP147</i> | 4.03735 | 2.46956 | 9.05094 | 8.0589  | 2.62949 |
| <i>ZmPP107</i> | 21.688   | 22.6746  | 34.1335  | 34.0586 | 1.53715 | <i>ZmPP84</i>  | 133.799 | 129.48  | 350.681 | 314.375 | 2.52605 |
| <i>ZmPP156</i> | 13.9405  | 8.38363  | 16.3703  | 16.983  | 1.49405 | <i>ZmPP77</i>  | 2.54611 | 2.86422 | 6.16176 | 6.7516  | 2.3868  |
| <i>ZmPP151</i> | 29.9995  | 30.2764  | 45.3952  | 43.1828 | 1.46954 | <i>ZmPP86</i>  | 36.7961 | 26.6074 | 74.953  | 76.3566 | 2.38646 |
| <i>ZmPP118</i> | 12.4979  | 10.1137  | 17.059   | 16.0399 | 1.4638  | <i>ZmPP70</i>  | 24.9858 | 22.9534 | 51.6358 | 59.722  | 2.3229  |
| <i>ZmPP132</i> | 30.9497  | 19.4919  | 37.8076  | 32.7186 | 1.39818 | <i>ZmPP66</i>  | 2.32257 | 2.77945 | 4.39515 | 6.9931  | 2.23211 |
| <i>ZmPP59</i>  | 16.8321  | 14.6969  | 15.7944  | 26.2278 | 1.33281 | <i>ZmPP16</i>  | 2.7846  | 2.6143  | 5.70469 | 6.11631 | 2.18952 |
| <i>ZmPP3</i>   | 34.6636  | 29.4353  | 42.0113  | 42.4058 | 1.31698 | <i>ZmPP11</i>  | 21.0873 | 19.269  | 39.5077 | 41.0968 | 1.99732 |
| <i>ZmPP85</i>  | 148.536  | 151.026  | 195.212  | 194.284 | 1.30022 | <i>ZmPP50</i>  | 18.648  | 15.3533 | 32.0618 | 35.4659 | 1.98603 |
| <i>ZmPP49</i>  | 7.81392  | 5.96188  | 8.66562  | 8.95123 | 1.27883 | <i>ZmPP12</i>  | 21.3986 | 24.09   | 44.2435 | 44.1075 | 1.94227 |
| <i>ZmPP121</i> | 5.34135  | 5.80499  | 6.35177  | 7.88247 | 1.27703 | <i>ZmPP119</i> | 9.55329 | 7.13517 | 15.3407 | 16.8754 | 1.93044 |
| <i>ZmPP103</i> | 24.191   | 28.1741  | 33.8413  | 32.7325 | 1.27134 | <i>ZmPP74</i>  | 8.29224 | 10.5032 | 16.1432 | 19.4852 | 1.89559 |

|         |          |          |          |          |         |         |         |         |         |         |         |
|---------|----------|----------|----------|----------|---------|---------|---------|---------|---------|---------|---------|
| ZmPP116 | 9.69173  | 11.7587  | 13.0926  | 13.9851  | 1.26234 | ZmPP159 | 23.1697 | 21.8698 | 39.8886 | 42.1443 | 1.82135 |
| ZmPP122 | 13.7251  | 10.217   | 14.9458  | 15.2366  | 1.26064 | ZmPP103 | 17.6715 | 15.288  | 26.4096 | 31.4388 | 1.75514 |
| ZmPP158 | 27.3912  | 29.5786  | 37.5611  | 33.5318  | 1.24791 | ZmPP121 | 9.10774 | 11.0797 | 18.0611 | 15.5674 | 1.66581 |
| ZmPP39  | 7.28209  | 3.93612  | 6.8885   | 7.07429  | 1.24465 | ZmPP117 | 7.9963  | 8.77288 | 13.3379 | 14.257  | 1.64557 |
| ZmPP8   | 20.4467  | 39.3878  | 34.0703  | 39.7544  | 1.23381 | ZmPP125 | 13.2454 | 13.1151 | 20.3106 | 22.9016 | 1.63928 |
| ZmPP143 | 16.6265  | 14.9732  | 18.7862  | 19.6428  | 1.21612 | ZmPP85  | 33.648  | 22.3069 | 50.4755 | 40.3082 | 1.62244 |
| ZmPP141 | 4.25445  | 3.4396   | 4.80061  | 4.39825  | 1.19558 | ZmPP58  | 18.4888 | 15.2274 | 26.7394 | 27.8146 | 1.61804 |
| ZmPP76  | 70.5727  | 69.0452  | 88.4138  | 77.148   | 1.18582 | ZmPP5   | 152.889 | 162.416 | 251.413 | 253.521 | 1.60141 |
| ZmPP12  | 10.3607  | 12.8873  | 13.9513  | 13.3005  | 1.17222 | ZmPP30  | 18.2591 | 14.2942 | 26.1071 | 23.2174 | 1.51519 |
| ZmPP27  | 11.3944  | 10.7615  | 13.0402  | 12.9301  | 1.17216 | ZmPP36  | 32.1811 | 26.3726 | 45.0716 | 42.6853 | 1.49874 |
| ZmPP123 | 4.61382  | 5.01435  | 5.42137  | 5.85181  | 1.17085 | ZmPP18  | 33.9997 | 27.1508 | 46.9525 | 44.221  | 1.49097 |
| ZmPP120 | 0.849872 | 0.678156 | 0.960236 | 0.828849 | 1.17085 | ZmPP153 | 32.3494 | 41.6334 | 45.9235 | 63.9916 | 1.48568 |
| ZmPP2   | 16.2443  | 15.017   | 18.3718  | 17.8721  | 1.15939 | ZmPP1   | 47.704  | 28.7508 | 54.255  | 58.6306 | 1.4765  |
| ZmPP54  | 50.1249  | 37.8985  | 47.5748  | 52.7962  | 1.14028 | ZmPP131 | 16.2074 | 13.7505 | 20.8027 | 23.3582 | 1.4741  |
| ZmPP11  | 17.2698  | 19.2814  | 15.7121  | 16.647   | 1.12955 | ZmPP52  | 16.4845 | 13.6432 | 21.9472 | 19.8485 | 1.38728 |
| ZmPP33  | 7.07584  | 7.44706  | 8.98425  | 7.08869  | 1.10673 | ZmPP55  | 57.8138 | 37.7231 | 67.4245 | 61.6255 | 1.35079 |
| ZmPP46  | 86.2351  | 80.2141  | 90.1065  | 93.5276  | 1.10324 | ZmPP51  | 24.774  | 20.3823 | 32.3474 | 28.6036 | 1.34978 |
| ZmPP86  | 20.7928  | 20.0617  | 22.042   | 22.2939  | 1.08521 | ZmPP26  | 131.027 | 107.928 | 161.833 | 160.163 | 1.34752 |
| ZmPP153 | 25.1572  | 23.6001  | 27.0062  | 25.6218  | 1.07939 | ZmPP32  | 12.1652 | 13.687  | 18.8258 | 15.7912 | 1.33903 |
| ZmPP28  | 8.18833  | 8.90074  | 9.48358  | 8.7541   | 1.06721 | ZmPP139 | 19.1456 | 15.9555 | 22.8918 | 21.8025 | 1.2733  |
| ZmPP93  | 70.6074  | 27.1429  | 54.3915  | 49.8267  | 1.06617 | ZmPP105 | 9.85205 | 10.0315 | 10.8037 | 14.4375 | 1.26945 |
| ZmPP38  | 21.0444  | 19.3032  | 20.3132  | 22.4182  | 1.05908 | ZmPP149 | 1.03684 | 1.02955 | 1.32947 | 1.25263 | 1.24957 |
| ZmPP42  | 14.864   | 15.9897  | 16.9183  | 15.4272  | 1.04835 | ZmPP78  | 17.8435 | 16.8402 | 20.6351 | 21.9734 | 1.22849 |
| ZmPP138 | 22.5884  | 19.7551  | 22.4607  | 20.1412  | 1.0061  | ZmPP14  | 14.9371 | 13.3572 | 16.7259 | 16.7702 | 1.18385 |
| ZmPP106 | 15.7094  | 16.3935  | 15.9277  | 16.284   | 1.00339 | ZmPP138 | 33.0021 | 25.4637 | 36.8276 | 32.2419 | 1.18137 |
| ZmPP40  | 0.331158 | 0.117346 | 0.073778 | 0        | 6.0791  | ZmPP144 | 15.1872 | 13.5984 | 16.1179 | 17.7065 | 1.17505 |
| ZmPP133 | 116.6    | 229.209  | 54.2873  | 50.5259  | 3.29929 | ZmPP24  | 2.36699 | 1.78147 | 2.32481 | 2.52774 | 1.16972 |
| ZmPP68  | 1.11747  | 0.397004 | 0.389779 | 0.294518 | 2.21318 | ZmPP128 | 14.5558 | 13.6606 | 15.2649 | 17.4691 | 1.16011 |
| ZmPP125 | 13.4543  | 13.0776  | 8.20332  | 7.28758  | 1.71274 | ZmPP100 | 23.7016 | 23.6762 | 27.2509 | 26.4344 | 1.13313 |
| ZmPP77  | 6.45944  | 5.1612   | 3.64185  | 3.23558  | 1.68968 | ZmPP140 | 68.2834 | 64.9481 | 70.1462 | 79.5097 | 1.12328 |
| ZmPP105 | 55.6624  | 94.3706  | 49.7978  | 45.3481  | 1.57687 | ZmPP81  | 29.4897 | 27.2894 | 32.1501 | 31.5501 | 1.1219  |
| ZmPP7   | 0.461365 | 0.462036 | 0.318559 | 0.279202 | 1.54477 | ZmPP62  | 47.1975 | 51.166  | 56.48   | 53.7435 | 1.12057 |
| ZmPP95  | 16.4874  | 9.02565  | 9.22345  | 7.32581  | 1.54164 | ZmPP19  | 29.9932 | 26.1723 | 29.0573 | 33.827  | 1.11963 |
| ZmPP24  | 6.96567  | 8.63377  | 5.33443  | 4.93724  | 1.51869 | ZmPP22  | 45.0931 | 34.4947 | 42.2148 | 46.5219 | 1.11495 |
| ZmPP101 | 19.1545  | 15.0024  | 11.5594  | 11.5565  | 1.47764 | ZmPP73  | 12.0116 | 10.2779 | 11.7121 | 13.0759 | 1.11209 |
| ZmPP96  | 73.7034  | 71.8415  | 53.0655  | 47.0989  | 1.45306 | ZmPP44  | 10.0116 | 7.85127 | 10.2215 | 9.6331  | 1.1115  |
| ZmPP137 | 8.36853  | 7.29775  | 5.40696  | 5.41981  | 1.44699 | ZmPP104 | 47.1538 | 28.9169 | 45.6717 | 38.4602 | 1.10597 |
| ZmPP55  | 57.3109  | 49.1493  | 41.1232  | 34.6892  | 1.40426 | ZmPP33  | 5.38771 | 5.76108 | 6.63012 | 5.46192 | 1.08461 |
| ZmPP159 | 37.4392  | 39.969   | 29.3275  | 26.8906  | 1.37693 | ZmPP83  | 31.5839 | 34.7421 | 38.2951 | 32.3841 | 1.06563 |
| ZmPP87  | 55.9537  | 53.485   | 43.5427  | 37.9824  | 1.34239 | ZmPP80  | 9.96954 | 9.04872 | 10.0567 | 9.87198 | 1.04787 |
| ZmPP117 | 7.22686  | 12.8119  | 8.27118  | 6.66828  | 1.34133 | ZmPP42  | 15.3564 | 17.8587 | 16.7892 | 17.9745 | 1.04662 |
| ZmPP35  | 5.25554  | 3.07415  | 2.72464  | 3.48644  | 1.3411  | ZmPP21  | 9.3037  | 9.46444 | 8.91574 | 10.6738 | 1.04377 |
| ZmPP134 | 14.217   | 12.0266  | 10.1268  | 9.54927  | 1.33378 | ZmPP90  | 12.479  | 10.2509 | 11.5734 | 12.0774 | 1.04051 |
| ZmPP50  | 19.6598  | 22.3562  | 16.3207  | 16.0971  | 1.29608 | ZmPP64  | 8.2555  | 6.00063 | 7.15862 | 7.63307 | 1.03757 |

|         |         |         |         |         |         |         |         |          |          |          |         |
|---------|---------|---------|---------|---------|---------|---------|---------|----------|----------|----------|---------|
| ZmPP79  | 30.4668 | 31.5017 | 24.3475 | 23.5499 | 1.29378 | ZmPP108 | 14.8591 | 16.988   | 15.6455  | 16.774   | 1.01797 |
| ZmPP145 | 163.038 | 166.309 | 130.26  | 130.151 | 1.26472 | ZmPP23  | 29.7905 | 27.8377  | 29.0629  | 29.6003  | 1.01796 |
| ZmPP10  | 7.45523 | 8.42871 | 6.76743 | 5.82466 | 1.26142 | ZmPP141 | 16.1016 | 13.7913  | 14.914   | 15.0749  | 1.00321 |
| ZmPP73  | 11.4903 | 8.45641 | 8.2788  | 7.60057 | 1.25614 | ZmPP99  | 48.7079 | 55.2251  | 55.8019  | 48.4354  | 1.00293 |
| ZmPP44  | 6.60234 | 6.27345 | 5.06418 | 5.31486 | 1.24056 | ZmPP146 | 30.2943 | 26.0334  | 3.04059  | 2.54314  | 10.0878 |
| ZmPP19  | 16.3468 | 20.3377 | 14.6321 | 15.0629 | 1.23538 | ZmPP59  | 13.8876 | 17.5477  | 2.9221   | 2.33276  | 5.98214 |
| ZmPP5   | 70.5041 | 83.5952 | 63.4697 | 61.4093 | 1.23399 | ZmPP35  | 5.42582 | 4.37968  | 0.898318 | 1.0287   | 5.08843 |
| ZmPP81  | 23.1525 | 27.052  | 21.5792 | 19.267  | 1.22911 | ZmPP28  | 10.6021 | 12.4982  | 3.38174  | 3.89878  | 3.17289 |
| ZmPP62  | 29.0449 | 36.8254 | 28.786  | 26.0936 | 1.20027 | ZmPP87  | 10.4185 | 15.5331  | 3.83474  | 5.73153  | 2.71282 |
| ZmPP65  | 90.8401 | 72.7938 | 68.9515 | 67.4221 | 1.19989 | ZmPP29  | 38.373  | 31.4447  | 14.6423  | 12.1796  | 2.60301 |
| ZmPP139 | 13.2522 | 12.3145 | 10.3855 | 11.0228 | 1.19424 | ZmPP133 | 1.74203 | 0.850706 | 0.329314 | 0.71266  | 2.48829 |
| ZmPP152 | 22.3027 | 24.3494 | 20.5095 | 18.559  | 1.19411 | ZmPP156 | 9.94471 | 6.3643   | 3.61743  | 3.17095  | 2.40249 |
| ZmPP155 | 100.941 | 114.559 | 90.2031 | 91.0936 | 1.18866 | ZmPP110 | 12.4356 | 11.2484  | 5.04746  | 5.00348  | 2.3564  |
| ZmPP144 | 21.9672 | 23.7418 | 20.7523 | 17.7033 | 1.18862 | ZmPP145 | 55.6328 | 69.2476  | 24.6477  | 31.2308  | 2.23486 |
| ZmPP140 | 82.3085 | 89.68   | 71.7232 | 73.3405 | 1.18561 | ZmPP46  | 6.68555 | 8.99703  | 5.03838  | 2.12323  | 2.18981 |
| ZmPP98  | 27.1719 | 23.8227 | 21.0347 | 22.0664 | 1.18314 | ZmPP120 | 6.39303 | 5.02293  | 3.07505  | 2.20925  | 2.16035 |
| ZmPP71  | 17.7559 | 13.8277 | 12.381  | 14.3298 | 1.18243 | ZmPP9   | 7.35266 | 5.38827  | 3.03914  | 2.92015  | 2.13799 |
| ZmPP18  | 15.7235 | 17.0493 | 13.7021 | 14.0364 | 1.18149 | ZmPP68  | 3.62532 | 4.41198  | 2.05066  | 1.72709  | 2.12754 |
| ZmPP70  | 42.0596 | 44.3133 | 38.5656 | 34.5762 | 1.1809  | ZmPP72  | 38.5462 | 32.3006  | 17.3409  | 19.0816  | 1.94514 |
| ZmPP83  | 36.3859 | 31.317  | 29.5255 | 28.0858 | 1.17517 | ZmPP95  | 5.44812 | 4.45256  | 2.45946  | 3.18048  | 1.75546 |
| ZmPP34  | 13.6408 | 12.8962 | 11.1403 | 11.4769 | 1.17331 | ZmPP37  | 9.65837 | 7.64606  | 5.58963  | 4.52721  | 1.71046 |
| ZmPP115 | 58.4366 | 38.2366 | 45.1109 | 37.283  | 1.17331 | ZmPP118 | 24.2233 | 24.4197  | 13.4486  | 15.4172  | 1.68514 |
| ZmPP52  | 17.2767 | 13.5477 | 14.6748 | 11.736  | 1.16711 | ZmPP47  | 168.488 | 183.085  | 100.35   | 108.859  | 1.68049 |
| ZmPP58  | 86.972  | 119.642 | 83.8663 | 93.2094 | 1.16681 | ZmPP94  | 1.14893 | 0.923301 | 0.376262 | 0.901773 | 1.62142 |
| ZmPP78  | 22.2092 | 20.7969 | 17.5028 | 19.3801 | 1.16602 | ZmPP143 | 7.00821 | 8.08854  | 5.09695  | 4.62049  | 1.55357 |
| ZmPP112 | 2.86505 | 0.9147  | 1.52314 | 1.73677 | 1.15946 | ZmPP31  | 1.01396 | 2.30448  | 1.10731  | 1.05203  | 1.53678 |
| ZmPP110 | 9.41879 | 8.66314 | 7.92931 | 7.69231 | 1.15749 | ZmPP54  | 22.6887 | 23.9481  | 15.3277  | 15.3092  | 1.52224 |
| ZmPP104 | 25.385  | 24.8747 | 21.9043 | 21.6233 | 1.15466 | ZmPP10  | 5.88827 | 6.7994   | 4.08401  | 4.38576  | 1.49799 |
| ZmPP1   | 73.4701 | 96.4074 | 73.7093 | 75.5407 | 1.13821 | ZmPP48  | 26.086  | 19.74    | 16.4954  | 14.3452  | 1.4859  |
| ZmPP108 | 9.12133 | 13.4001 | 9.70928 | 10.2021 | 1.13108 | ZmPP122 | 31.2016 | 26.8275  | 21.0068  | 18.8682  | 1.45528 |
| ZmPP69  | 2.22415 | 2.01515 | 1.87882 | 1.88163 | 1.12734 | ZmPP109 | 14.648  | 12.0413  | 9.39185  | 9.0439   | 1.44769 |
| ZmPP135 | 7.56716 | 6.81701 | 6.36205 | 6.45553 | 1.12222 | ZmPP75  | 28.0376 | 30.122   | 19.8514  | 20.4468  | 1.44323 |
| ZmPP100 | 23.3465 | 21.7561 | 21.0255 | 19.3686 | 1.11656 | ZmPP101 | 20.7666 | 25.5066  | 16.1951  | 16.0416  | 1.43542 |
| ZmPP75  | 23.0639 | 23.5941 | 19.4665 | 22.3424 | 1.11598 | ZmPP135 | 16.268  | 16.2142  | 11.8223  | 11.311   | 1.40413 |
| ZmPP45  | 23.9198 | 21.4927 | 19.9735 | 20.75   | 1.11514 | ZmPP96  | 63.1203 | 46.9631  | 36.4465  | 42.1163  | 1.40122 |
| ZmPP109 | 6.73948 | 7.62699 | 6.39697 | 6.55203 | 1.10947 | ZmPP124 | 8.53421 | 6.4324   | 6.05305  | 4.99118  | 1.35515 |
| ZmPP99  | 75.6677 | 56.4876 | 62.7545 | 56.3758 | 1.10933 | ZmPP116 | 21.7695 | 22.5203  | 13.5557  | 19.2703  | 1.34923 |
| ZmPP32  | 9.95496 | 9.27084 | 9.28434 | 8.06862 | 1.10793 | ZmPP13  | 6.61811 | 7.79393  | 5.94663  | 5.06791  | 1.30846 |
| ZmPP37  | 6.62915 | 7.10718 | 6.22466 | 6.25631 | 1.10058 | ZmPP49  | 15.7871 | 13.8159  | 11.2344  | 11.8965  | 1.2798  |
| ZmPP23  | 26.6848 | 24.7501 | 22.7013 | 24.1619 | 1.09755 | ZmPP92  | 3.72201 | 4.85476  | 1.23605  | 1.3116   | 1.27383 |
| ZmPP114 | 12.6079 | 14.6025 | 12.5447 | 12.3065 | 1.09493 | ZmPP34  | 14.7981 | 13.5688  | 10.9697  | 11.592   | 1.2573  |
| ZmPP136 | 38.6948 | 42.125  | 37.3907 | 36.9024 | 1.08785 | ZmPP79  | 67.725  | 58.7948  | 48.5442  | 52.8332  | 1.24801 |
| ZmPP14  | 30.7162 | 34.3841 | 28.664  | 32.2899 | 1.06803 | ZmPP137 | 17.7565 | 17.5794  | 14.3021  | 14.4142  | 1.23052 |
| ZmPP88  | 30.0892 | 29.6455 | 28.3706 | 27.6331 | 1.06662 | ZmPP45  | 34.5749 | 29.6712  | 25.3792  | 27.241   | 1.22094 |

|         |          |          |         |          |         |         |         |         |         |         |         |
|---------|----------|----------|---------|----------|---------|---------|---------|---------|---------|---------|---------|
| ZmPP64  | 2.64749  | 3.07377  | 2.64029 | 2.73406  | 1.06455 | ZmPP123 | 6.20928 | 7.59663 | 4.85596 | 6.59948 | 1.20518 |
| ZmPP131 | 20.8915  | 17.136   | 19.2322 | 16.5843  | 1.06173 | ZmPP25  | 9.58167 | 10.8395 | 8.72324 | 8.39267 | 1.19311 |
| ZmPP41  | 7.26561  | 7.52162  | 7.7893  | 6.18906  | 1.05787 | ZmPP155 | 32.1221 | 26.1056 | 24.4357 | 24.6018 | 1.18741 |
| ZmPP25  | 9.24159  | 8.83369  | 8.68741 | 8.4241   | 1.05632 | ZmPP41  | 13.528  | 18.0055 | 10.5297 | 16.5774 | 1.16329 |
| ZmPP89  | 63.2377  | 54.4462  | 63.9442 | 48.0936  | 1.05039 | ZmPP38  | 8.25554 | 10.921  | 8.05281 | 8.46345 | 1.16107 |
| ZmPP48  | 4.81959  | 3.54623  | 3.68704 | 4.27749  | 1.05038 | ZmPP115 | 42.4696 | 43.9734 | 39.9785 | 35.8384 | 1.14015 |
| ZmPP36  | 27.4638  | 29.6612  | 27.3134 | 27.2252  | 1.04742 | ZmPP151 | 42.9379 | 45.735  | 38.969  | 39.0487 | 1.13657 |
| ZmPP128 | 12.4945  | 10.1266  | 10.6101 | 10.99    | 1.04727 | ZmPP3   | 27.2061 | 26.6465 | 23.8611 | 25.3199 | 1.09499 |
| ZmPP97  | 0.590819 | 0.402196 | 0.46661 | 0.483317 | 1.04536 | ZmPP17  | 19.9973 | 16.4668 | 17.8732 | 15.4746 | 1.09345 |
| ZmPP47  | 112.683  | 67.4409  | 92.4163 | 80.2367  | 1.04327 | ZmPP4   | 28.9875 | 28.2602 | 25.5453 | 27.193  | 1.08551 |
| ZmPP16  | 8.97193  | 9.7205   | 8.69455 | 9.23408  | 1.0426  | ZmPP129 | 9.44188 | 6.9871  | 8.1242  | 7.02719 | 1.08432 |
| ZmPP22  | 17.5356  | 15.4169  | 16.9908 | 14.9159  | 1.03278 | ZmPP106 | 21.1864 | 22.4172 | 18.9966 | 21.7125 | 1.0711  |
| ZmPP72  | 14.4493  | 10.7897  | 12.7997 | 11.7949  | 1.0262  | ZmPP69  | 9.87477 | 10.9432 | 9.98304 | 9.56157 | 1.06515 |
| ZmPP30  | 26.8248  | 24.107   | 23.1794 | 26.4544  | 1.02615 | ZmPP88  | 32.7136 | 40.6227 | 36.3927 | 32.8025 | 1.05985 |
| ZmPP84  | 128.754  | 137.758  | 138.201 | 121.929  | 1.02453 | ZmPP111 | 47.4697 | 41.101  | 37.6262 | 46.9569 | 1.04714 |
| ZmPP51  | 14.9271  | 14.0861  | 15.3687 | 13.0117  | 1.0223  | ZmPP98  | 39.117  | 40.6569 | 40.1608 | 37.1867 | 1.03137 |
| ZmPP82  | 17.2773  | 14.9322  | 14.7487 | 16.8395  | 1.01967 | ZmPP65  | 69.6937 | 68.7188 | 66.9736 | 68.5842 | 1.02106 |
| ZmPP56  | 0        | 0        | 0       | 0        | -       | ZmPP134 | 12.1784 | 10.8482 | 9.97209 | 12.7846 | 1.01186 |
| ZmPP4   | 0        | 0        | 0       | 0        | -       | ZmPP136 | 32.0371 | 32.32   | 34.8645 | 28.9263 | 1.00888 |
| ZmPP92  | 0        | 0        | 0       | 0        | -       | ZmPP97  | 0       | 0       | 0       | 0       | -       |
| ZmPP26  | 128.794  | 118.324  | 0       | 0        | -       | ZmPP7   | 0       | 0       | 0       | 0       | -       |
| ZmPP111 | 0        | 0        | 18.0403 | 18.3423  | -       | ZmPP2   | 0       | 0       | 0       | 0       | -       |
| ZmPP94  | 0        | 0        | 0       | 0        | -       | ZmPP71  | 0       | 0       | 0       | 0       | -       |
| ZmPP102 | 0        | 0        | 0       | 0        | -       | ZmPP40  | 0       | 0       | 0       | 0       | -       |
| ZmPP13  | 5.25889  | 5.96888  | 0       | 0        | -       | ZmPP113 | 0       | 0       | 0       | 0       | -       |
| ZmPP17  | 12.2193  | 12.2176  | 0       | 0        | -       | ZmPP93  | 0       | 0       | 79.8298 | 69.0419 | -       |
