# Supplementary material for: Maize protein phosphatase gene family: identification and molecular characterization
Source: PubMed Central journal article supplement (PMC4169795; doi:10.1186/1471-2164-15-773), 2014-09-09
Supplement: 12864_2014_6458_MOESM19_ESM.pdf [file 12864_2014_6458_MOESM19_ESM.pdf]

**Table S9.** List of FPKM values of components involved in ABA biosynthesis and ABA-dependent pathway of response to drought in vegetative tissue (leaf) under both drought and well-watered conditions.under both drought and well-watered conditions.

MLC and MLD stand for maize basal leaf meristem, well watered and drought, respectively.

Numbers 1 and 2 indicate the two biological replicates.

The extent of differential expression is measured in terms of fold change and (-) indicates failure to calculate or undetected values.

Values in red and blue indicate the fold increase and decrease in expression in the drought-stressed tissue, respectively.

| Name            | MLC.1   | MLC.2   | MLD.1   | MLD.2   | leaf       |
|-----------------|---------|---------|---------|---------|------------|
| <i>ZmNCED5</i>  | 0.62933 | 0.94671 | 4.61936 | 7.28051 | 7.55052562 |
| <i>ZmNCED3</i>  | 0.16654 | 1.22934 | 0.72204 | 1.02595 | 1.25224661 |
| <i>VP14</i>     | 1.79557 | 2.2555  | 3.16196 | 6.01443 | 2.26517685 |
| <i>ZmAO1</i>    | 3.60535 | 3.50057 | 3.50726 | 4.49193 | 1.12570786 |
| <i>ZmABA3</i>   | 49.8809 | 39.4595 | 40.0753 | 53.0794 | 1.04269401 |
| <i>ZmAO2</i>    | 36.9973 | 55.9415 | 26.8218 | 31.9814 | 1.58050582 |
| <i>ZmZEP</i>    | 47.2803 | 55.0909 | 39.9891 | 49.3702 | 1.14561327 |
| <i>ZmNCED2</i>  | 0.45339 | 0.13586 | 0.18707 | 0.39581 | 1.01093356 |
| <i>ZmRACR3</i>  | 6.4989  | 6.19568 | 7.64866 | 6.86369 | 1.14319261 |
| <i>ZmRACR7</i>  | 2.06334 | 4.00065 | 0.97855 | 0.59528 | 3.85302931 |
| <i>ZmRACR6</i>  | 19.5262 | 28.7328 | 12.5767 | 6.03131 | 2.59345303 |
| <i>ZmRACR11</i> | 14.2379 | 14.4443 | 6.43849 | 5.51184 | 2.40011782 |
| <i>ZmRACR13</i> | 2.3419  | 4.38102 | 2.20695 | 2.25284 | 1.50745214 |
| <i>ZmRACR1</i>  | 105.047 | 126.242 | 87.539  | 73.3419 | 1.43764114 |
| <i>ZmRACR2</i>  | 62.5026 | 55.5645 | 56.2156 | 47.6209 | 1.13704815 |
| <i>ZmRACR4</i>  | 101.254 | 125.301 | 109.27  | 90.3924 | 1.13469036 |
| <i>ZmRACR5</i>  | 37.8236 | 41.0704 | 39.7535 | 38.3082 | 1.01066208 |
| <i>ZmPP130</i>  | 0.18567 | 0.06607 | 1.33133 | 1.90762 | 12.8659954 |
| <i>ZmPP154</i>  | 1.59809 | 0.3767  | 5.761   | 9.98914 | 7.97561055 |
| <i>ZmPP31</i>   | 0.20963 | 0.11168 | 0.56248 | 1.0729  | 5.08978018 |
| <i>ZmPP6</i>    | 13.2422 | 5.96945 | 21.988  | 27.9786 | 2.60084896 |
| <i>ZmPP127</i>  | 12.2224 | 11.8801 | 27.1083 | 24.6031 | 2.14547869 |
| <i>ZmPP57</i>   | 18.5235 | 14.0137 | 28.2524 | 33.7509 | 1.90561265 |
| <i>ZmPP53</i>   | 19.9122 | 12.6392 | 26.7656 | 25.6849 | 1.61131319 |
| <i>ZmPP107</i>  | 21.688  | 22.6746 | 34.1335 | 34.0586 | 1.53715292 |
| <i>ZmPP132</i>  | 30.9497 | 19.4919 | 37.8076 | 32.7186 | 1.39817532 |
| <i>ZmPP121</i>  | 5.34135 | 5.80499 | 6.35177 | 7.88247 | 1.27703264 |
| <i>ZmPP39</i>   | 7.28209 | 3.93612 | 6.8885  | 7.07429 | 1.24465401 |
| <i>ZmPP123</i>  | 4.61382 | 5.01435 | 5.42137 | 5.85181 | 1.17085386 |
| <i>ZmPP134</i>  | 14.217  | 12.0266 | 10.1268 | 9.54927 | 1.33378261 |
| <i>ZmPP112</i>  | 2.86505 | 0.9147  | 1.52314 | 1.73677 | 1.15946453 |

|                   |         |         |         |         |            |
|-------------------|---------|---------|---------|---------|------------|
| <i>ZmPP108</i>    | 9.12133 | 13.4001 | 9.70928 | 10.2021 | 1.13108333 |
| <i>ZmSnRK2.1</i>  | 18.337  | 9.38266 | 19.9432 | 28.3008 | 1.74042539 |
| <i>ZmSnRK2.11</i> | 60.9796 | 47.7941 | 76.5369 | 74.2249 | 1.38601335 |
| <i>ZmSnRK2.8</i>  | 36.5374 | 30.3637 | 41.7699 | 44.9881 | 1.29680977 |
| <i>ZmSnRK2.5</i>  | 55.4515 | 66.9464 | 69.9633 | 77.8876 | 1.20795291 |
| <i>ZmSnRK2.9</i>  | 75.3773 | 63.5691 | 77.89   | 82.4513 | 1.15397952 |
| <i>ZmSnRK2.2</i>  | 7.08055 | 7.60499 | 7.20634 | 8.82873 | 1.09189516 |
| <i>ZmSnRK2.6</i>  | 34.5763 | 32.2517 | 34.982  | 35.8112 | 1.05933441 |
| <i>ZmSnRK2.7</i>  | 22.5727 | 21.4951 | 24.0242 | 21.0826 | 1.02357731 |
| <i>ZmSnRK2.4</i>  | 14.7863 | 14.4142 | 16.1686 | 13.2488 | 1.00742796 |
| <i>ZmSnRK2.12</i> | 18.2365 | 20.7825 | 13.2286 | 18.0797 | 1.24628293 |
| <i>ZmSnRK2.10</i> | 44.2821 | 45.75   | 40.9253 | 35.6434 | 1.17583425 |
| <i>ZmSnRK2.13</i> | 43.0578 | 40.8371 | 37.9779 | 37.8255 | 1.10674323 |
| <i>ZmSnRK2.14</i> | 65.5268 | 59.0061 | 61.6601 | 55.4941 | 1.0629828  |
| <i>ZmSnRK2.3</i>  | 41.9692 | 39.0476 | 39.3765 | 40.6054 | 1.01293918 |
| <i>ZmMYB078</i>   | 0.36451 | 0.23698 | 7.49355 | 10.3334 | 29.637736  |
| <i>ZmMYB139</i>   | 0.46439 | 0.3479  | 1.86158 | 2.06539 | 4.83446717 |
| <i>ZmMYB132</i>   | 7.80069 | 1.64123 | 20.6836 | 22.4455 | 4.56783154 |
| <i>ZmMYB007</i>   | 0.5106  | 1.21128 | 3.08386 | 3.93265 | 4.07492177 |
| <i>ZmMYB144</i>   | 6.20284 | 2.93188 | 12.7554 | 23.2718 | 3.94398515 |
| <i>ZmMYB088</i>   | 0.74759 | 0.3357  | 2.45472 | 1.68332 | 3.81991024 |
| <i>ZmMYB123</i>   | 1.48828 | 0.47326 | 1.69531 | 4.71928 | 3.27018891 |
| <i>ZmMYB070</i>   | 4.23764 | 5.69844 | 19.3894 | 12.9287 | 3.25260062 |
| <i>ZmMYB043</i>   | 4.2597  | 1.61696 | 8.33236 | 10.4575 | 3.19737062 |
| <i>ZmMYB085</i>   | 6.14869 | 1.85597 | 11.5525 | 13.6693 | 3.15088961 |
| <i>ZmMYB048</i>   | 0.34564 | 0.082   | 0.68843 | 0.55145 | 2.89935857 |
| <i>ZmMYB038</i>   | 0.78626 | 0.27978 | 1.64432 | 1.41122 | 2.86625536 |
| <i>ZmMYB021</i>   | 3.015   | 0.57694 | 4.10382 | 4.76696 | 2.46963823 |
| <i>ZmMYB092</i>   | 0.56644 | 0.92719 | 1.84123 | 1.83704 | 2.46262976 |
| <i>ZmMYB030</i>   | 3.33484 | 2.6988  | 7.58137 | 7.15701 | 2.44270125 |
| <i>ZmMYB018</i>   | 0.29348 | 0.41772 | 0.5892  | 1.14068 | 2.43234735 |
| <i>ZmMYB074</i>   | 0.5187  | 0.53007 | 1.11895 | 1.09316 | 2.10924226 |
| <i>ZmMYB027</i>   | 9.76142 | 10.535  | 21.6554 | 20.4102 | 2.07256255 |
| <i>ZmMYB109</i>   | 6.0272  | 5.48436 | 11.9609 | 11.8298 | 2.06667906 |
| <i>ZmMYB073</i>   | 18.6937 | 13.0509 | 37.9208 | 23.8547 | 1.94601602 |
| <i>ZmMYB036</i>   | 3.13208 | 2.75592 | 7.10485 | 3.56683 | 1.81244565 |
| <i>ZmMYB095</i>   | 4.26759 | 3.44705 | 6.64936 | 7.09217 | 1.78122764 |
| <i>ZmMYB006</i>   | 0.46231 | 0.31688 | 0.68272 | 0.69295 | 1.76549221 |
| <i>ZmMYB011</i>   | 0.92071 | 0.48762 | 0.94616 | 1.36899 | 1.64389992 |
| <i>ZmMYB113</i>   | 7.79692 | 4.86681 | 9.18829 | 11.3631 | 1.6228544  |
| <i>ZmMYB022</i>   | 0.0976  | 0.24803 | 0.27922 | 0.24934 | 1.52925246 |

|          |         |         |         |         |            |
|----------|---------|---------|---------|---------|------------|
| ZmMYB114 | 4.0571  | 1.35393 | 4.16005 | 4.02    | 1.51173621 |
| ZmMYB041 | 15.953  | 8.49125 | 15.1612 | 20.8633 | 1.47374127 |
| ZmMYB094 | 2.6967  | 0.45298 | 2.28797 | 2.31712 | 1.46208186 |
| ZmMYB068 | 0.90367 | 0.18375 | 1.0285  | 0.55397 | 1.45525539 |
| ZmMYB117 | 2.72546 | 0.60932 | 1.63705 | 3.15111 | 1.43582485 |
| ZmMYB138 | 0.64155 | 0.47832 | 0.94922 | 0.60505 | 1.3879043  |
| ZmMYB028 | 10.7383 | 5.91565 | 11.8495 | 11.1356 | 1.38015906 |
| ZmMYB118 | 7.44262 | 8.59259 | 11.3254 | 9.8542  | 1.32081837 |
| ZmMYB121 | 4.76735 | 2.22465 | 3.0469  | 6.16956 | 1.31814359 |
| ZmMYB052 | 17.9112 | 10.6115 | 20.3097 | 15.9475 | 1.27116998 |
| ZmMYB064 | 3.68302 | 0.48095 | 3.35958 | 1.80686 | 1.2407501  |
| ZmMYB133 | 1.33065 | 1.04226 | 1.34742 | 1.32549 | 1.12642705 |
| ZmMYB142 | 6.79843 | 5.82314 | 7.07472 | 6.95568 | 1.11162082 |
| ZmMYB148 | 1.58115 | 1.0172  | 1.47462 | 1.39389 | 1.10397368 |
| ZmMYB039 | 13.7325 | 9.84747 | 16.4193 | 8.64131 | 1.06279228 |
| ZmMYB112 | 1.4216  | 1.67282 | 1.61539 | 1.65844 | 1.05797855 |
| ZmMYB135 | 0.42447 | 0.03804 | 0.21875 | 0.26297 | 1.04155865 |
| ZmMYB149 | 2.80876 | 1.47496 | 2.33477 | 2.10246 | 1.03583568 |
| ZmMYB062 | 0.44478 | 0.46338 | 0.50181 | 0.43721 | 1.03398983 |
| ZmMYB140 | 0.68791 | 0.68137 | 0.68479 | 0.73038 | 1.03350958 |
| ZmMYB141 | 0.84256 | 0.78727 | 0.80292 | 0.8724  | 1.02791034 |
| ZmMYB081 | 19.2582 | 21.3786 | 21.8708 | 19.0773 | 1.00766054 |
| ZmMYB125 | 8.78834 | 7.06702 | 8.28961 | 7.5692  | 1.00021759 |
| ZmMYB101 | 297.08  | 1177.27 | 229.797 | 160.549 | 3.77703371 |
| ZmMYB015 | 31.8726 | 43.0598 | 10.7184 | 10.5171 | 3.52863837 |
| ZmMYB042 | 43.4511 | 74.2362 | 18.2417 | 16.2906 | 3.40803538 |
| ZmMYB071 | 5.14386 | 1.40586 | 0.71054 | 1.3945  | 3.11144238 |
| ZmMYB026 | 4.41967 | 2.46079 | 1.26674 | 1.13236 | 2.86793381 |
| ZmMYB008 | 5.797   | 5.30974 | 2.21016 | 1.769   | 2.79122729 |
| ZmMYB090 | 6.18198 | 9.43112 | 2.95644 | 3.10261 | 2.5768231  |
| ZmMYB076 | 38.3842 | 51.7332 | 22.8966 | 12.6884 | 2.53245469 |
| ZmMYB104 | 18.9333 | 20.5158 | 8.45762 | 7.64152 | 2.45038555 |
| ZmMYB122 | 3.9181  | 6.9636  | 2.7537  | 2.38041 | 2.11949101 |
| ZmMYB111 | 10.5205 | 7.37358 | 6.2158  | 2.61316 | 2.02674834 |
| ZmMYB143 | 12.3023 | 4.05625 | 4.0059  | 4.20127 | 1.99320229 |
| ZmMYB075 | 1.40706 | 0.51684 | 0.56412 | 0.40453 | 1.9861848  |
| ZmMYB024 | 5.29298 | 1.51077 | 1.72882 | 1.81018 | 1.92250636 |
| ZmMYB091 | 38.5306 | 69.1644 | 35.3546 | 24.8864 | 1.78773593 |
| ZmMYB016 | 2.79071 | 0.79852 | 1.05353 | 0.99204 | 1.75463122 |
| ZmMYB107 | 0.32002 | 0.6051  | 0.44401 | 0.10736 | 1.67787277 |
| ZmMYB066 | 3.83129 | 5.23522 | 2.69586 | 2.85309 | 1.63391452 |
| ZmMYB065 | 2.47891 | 1.25297 | 0.96728 | 1.31797 | 1.63302707 |
| ZmMYB150 | 2.58894 | 0.12913 | 0.94502 | 0.80851 | 1.55005244 |

|                  |         |         |         |         |            |
|------------------|---------|---------|---------|---------|------------|
| <i>ZmMYB100</i>  | 4.80165 | 5.12041 | 3.24733 | 3.16485 | 1.54737702 |
| <i>ZmMYB084</i>  | 2.35057 | 2.38366 | 1.80194 | 1.28418 | 1.53403951 |
| <i>ZmMYB017</i>  | 1.63267 | 1.07798 | 1.07202 | 0.70859 | 1.5223171  |
| <i>ZmMYB098</i>  | 12.5813 | 13.6882 | 9.37498 | 8.42583 | 1.47574745 |
| <i>ZmMYB103</i>  | 12.5813 | 13.6882 | 9.37498 | 8.42583 | 1.47574745 |
| <i>ZmMYB029</i>  | 13.856  | 15.5195 | 10.5416 | 9.70074 | 1.45119092 |
| <i>ZmMYB108</i>  | 9.50043 | 5.04737 | 4.7308  | 5.89831 | 1.36867527 |
| <i>ZmMYB106</i>  | 35.8632 | 33.6201 | 31.5895 | 22.0518 | 1.29533214 |
| <i>ZmMYB119</i>  | 8.80026 | 13.0191 | 9.08303 | 7.94514 | 1.28136846 |
| <i>ZmMYB040</i>  | 14.8308 | 4.74497 | 7.35195 | 8.66556 | 1.22214814 |
| <i>ZmMYB156</i>  | 2.09666 | 0.93443 | 1.21365 | 1.28617 | 1.2125213  |
| <i>ZmMYB069</i>  | 0.57741 | 1.56154 | 1.20065 | 0.56464 | 1.21166902 |
| <i>ZmMYB005</i>  | 0.26938 | 0.76687 | 0.37558 | 0.49277 | 1.19335841 |
| <i>ZmMYB151</i>  | 0.45099 | 0.944   | 0.65942 | 0.55168 | 1.15183697 |
| <i>ZmMYB126</i>  | 3.09456 | 0.65205 | 1.43934 | 1.84292 | 1.14147143 |
| <i>ZmMYB093</i>  | 5.29466 | 3.64507 | 3.55177 | 4.48149 | 1.11283962 |
| <i>ZmMYB049</i>  | 3.41012 | 3.71646 | 3.2866  | 3.15478 | 1.10637472 |
| <i>ZmMYB086</i>  | 0.47957 | 0.29254 | 0.52398 | 0.20353 | 1.06130775 |
| <i>ZmMYB023</i>  | 0.48966 | 0.6934  | 0.64861 | 0.48435 | 1.04422863 |
| <i>ZmMYB010</i>  | 19.8665 | 31.1161 | 28.1433 | 21.1307 | 1.03467549 |
| <i>ZmMYB110</i>  | 24.4323 | 20.131  | 28.2073 | 15.2173 | 1.02622246 |
| <i>ZmMYB131</i>  | 9.75473 | 9.25257 | 10.0046 | 8.61437 | 1.02085669 |
| <i>ZmMYB072</i>  | 1.28874 | 0.0096  | 0.35479 | 0.93544 | 1.0062927  |
| <i>ZmMYC8</i>    | 5.50526 | 3.68347 | 56.2334 | 83.0302 | 15.1559138 |
| <i>ZmMYC7</i>    | 20.8406 | 19.8705 | 71.7191 | 95.4893 | 4.10719435 |
| <i>ZmMYC4</i>    | 7.98938 | 6.56123 | 20.7688 | 26.5491 | 3.25195301 |
| <i>ZmMYC5</i>    | 4.82167 | 1.67122 | 5.37637 | 5.50085 | 1.67525093 |
| <i>ZmMYC3</i>    | 14.2999 | 16.2847 | 17.0407 | 18.8812 | 1.17450939 |
| <i>ZmMYC1</i>    | 33.3698 | 13.837  | 2.87612 | 2.29736 | 9.12476708 |
| <i>ZmMYC2</i>    | 182.915 | 58.8024 | 13.2296 | 19.9174 | 7.29228588 |
| <i>ZmMYC6</i>    | 8.10959 | 7.63966 | 6.62082 | 5.97033 | 1.25081903 |
| <i>ZmWRKY109</i> | 0.46629 | 0.33185 | 3.53445 | 5.78835 | 11.6807014 |
| <i>ZmWRKY85</i>  | 0.39591 | 0.4004  | 4.6765  | 4.488   | 11.5087523 |
| <i>ZmWRKY61</i>  | 85.8389 | 90.7044 | 318.309 | 385.829 | 3.98847195 |
| <i>ZmWRKY94</i>  | 16.8465 | 7.7075  | 43.9716 | 46.4398 | 3.68214548 |
| <i>ZmWRKY103</i> | 0.64725 | 0.69159 | 1.82744 | 2.30488 | 3.08648356 |
| <i>ZmWRKY112</i> | 112.37  | 23.7532 | 195.175 | 180.714 | 2.76138821 |
| <i>ZmWRKY79</i>  | 95.1914 | 45.4389 | 158.734 | 187.019 | 2.45859534 |
| <i>ZmWRKY9</i>   | 4.49523 | 6.59772 | 13.2492 | 9.37576 | 2.03958009 |
| <i>ZmWRKY33</i>  | 2.02748 | 2.24921 | 4.04563 | 4.61688 | 2.0255174  |
| <i>ZmWRKY42</i>  | 1.17895 | 1.00184 | 1.9346  | 2.4395  | 2.00574104 |

|           |         |         |         |         |            |
|-----------|---------|---------|---------|---------|------------|
| ZmWRKY12  | 3.11228 | 1.7073  | 4.26978 | 4.80174 | 1.8822221  |
| ZmWRKY64  | 0.73463 | 0.532   | 1.0227  | 1.30181 | 1.8351897  |
| ZmWRKY83  | 7.40744 | 5.95464 | 19.0804 | 5.01692 | 1.80341085 |
| ZmWRKY80  | 35.452  | 14.1855 | 47.1057 | 39.2222 | 1.73916696 |
| ZmWRKY101 | 2.21477 | 2.02372 | 3.79973 | 3.13307 | 1.63567686 |
| ZmWRKY93  | 13.2381 | 5.37843 | 15.0938 | 15.198  | 1.62714534 |
| ZmWRKY73  | 20.9058 | 18.9992 | 39.6238 | 25.2844 | 1.6265681  |
| ZmWRKY113 | 46.2962 | 28.4932 | 56.2427 | 63.41   | 1.59986175 |
| ZmWRKY24  | 2.08486 | 2.3135  | 3.43815 | 3.44791 | 1.56559718 |
| ZmWRKY21  | 11.2783 | 10.2819 | 15.7284 | 17.3495 | 1.53421119 |
| ZmWRKY77  | 14.7325 | 19.4428 | 26.0813 | 23.9489 | 1.46392863 |
| ZmWRKY60  | 9.65812 | 12.3963 | 16.4462 | 15.2636 | 1.43779796 |
| ZmWRKY8   | 4.25197 | 3.91233 | 6.20449 | 5.47764 | 1.43087956 |
| ZmWRKY20  | 9.95266 | 8.85841 | 13.079  | 13.7814 | 1.42790389 |
| ZmWRKY38  | 34.4158 | 33.651  | 55.9534 | 38.4693 | 1.38720639 |
| ZmWRKY115 | 313.907 | 300.489 | 480.797 | 368.901 | 1.38298101 |
| ZmWRKY15  | 1.64246 | 1.38682 | 2.07569 | 2.07669 | 1.37074816 |
| ZmWRKY96  | 4.61178 | 5.89036 | 8.33827 | 5.49246 | 1.31694398 |
| ZmWRKY19  | 0.34831 | 0.09916 | 0.1332  | 0.44839 | 1.29975439 |
| ZmWRKY110 | 7.55117 | 5.13758 | 8.25837 | 8.17892 | 1.29542232 |
| ZmWRKY98  | 0.8233  | 0.83264 | 0.89068 | 1.24439 | 1.28933172 |
| ZmWRKY51  | 1.40336 | 0.45694 | 1.00844 | 1.27162 | 1.22563839 |
| ZmWRKY34  | 8.12413 | 10.2146 | 11.1165 | 11.3301 | 1.2239997  |
| ZmWRKY59  | 8.20072 | 4.84478 | 8.4655  | 7.29404 | 1.20804415 |
| ZmWRKY57  | 3.47086 | 3.06005 | 4.29641 | 3.59097 | 1.2077     |
| ZmWRKY111 | 3.71656 | 1.73035 | 3.29874 | 3.18028 | 1.18948541 |
| ZmWRKY2   | 0.75777 | 0.40912 | 0.6745  | 0.69865 | 1.17674885 |
| ZmWRKY25  | 5.20535 | 5.74467 | 7.57851 | 5.08298 | 1.15629834 |
| ZmWRKY17  | 13.235  | 14.7469 | 15.6131 | 16.4192 | 1.14475071 |
| ZmWRKY68  | 46.1683 | 67.3684 | 71.4477 | 52.3077 | 1.0900035  |
| ZmWRKY82  | 22.7641 | 22.8555 | 23.8221 | 25.1898 | 1.07436058 |
| ZmWRKY54  | 0.40376 | 0.22988 | 0.2702  | 0.39983 | 1.05744019 |
| ZmWRKY1   | 8.04162 | 4.89421 | 6.82335 | 6.50719 | 1.03051292 |
| ZmWRKY100 | 1.07575 | 1.34952 | 0.3312  | 0.14445 | 5.09893996 |
| ZmWRKY29  | 2.64074 | 2.64856 | 1.27192 | 1.29687 | 2.05906283 |
| ZmWRKY39  | 16.8827 | 18.7772 | 9.68426 | 8.32029 | 1.9806049  |
| ZmWRKY41  | 2.39989 | 2.6687  | 1.43399 | 1.13875 | 1.97011358 |
| ZmWRKY72  | 1.01843 | 0.65397 | 0.66959 | 0.24485 | 1.82888416 |
| ZmWRKY116 | 0.456   | 0.55894 | 0.51997 | 0.04859 | 1.78509392 |
| ZmWRKY13  | 23.1891 | 28.1663 | 15.9621 | 13.9323 | 1.71789365 |
| ZmWRKY10  | 1.47513 | 1.37888 | 0.9472  | 0.71949 | 1.71238716 |
| ZmWRKY119 | 31.2341 | 31.4516 | 21.4001 | 15.4381 | 1.70164937 |
| ZmWRKY7   | 3.23664 | 2.59477 | 2.28405 | 1.18313 | 1.68188845 |

|                  |         |         |         |         |            |
|------------------|---------|---------|---------|---------|------------|
| <i>ZmWRKY65</i>  | 7.85328 | 8.40159 | 5.27591 | 4.44391 | 1.6723427  |
| <i>ZmWRKY31</i>  | 8.00229 | 8.26221 | 5.46083 | 4.60956 | 1.61508144 |
| <i>ZmWRKY63</i>  | 0.3566  | 0.57102 | 0.72446 | 0.70626 | 1.54235121 |
| <i>ZmWRKY46</i>  | 3.95376 | 6.12915 | 3.34955 | 3.25627 | 1.52636766 |
| <i>ZmWRKY76</i>  | 2.22397 | 2.55346 | 1.71294 | 1.44508 | 1.51279283 |
| <i>ZmWRKY90</i>  | 40.3453 | 90.5299 | 48.5456 | 39.3594 | 1.48882544 |
| <i>ZmWRKY58</i>  | 7.61986 | 7.03409 | 5.11582 | 4.77782 | 1.4811485  |
| <i>ZmWRKY71</i>  | 0.67353 | 0.72116 | 0.70607 | 0.27675 | 1.41907871 |
| <i>ZmWRKY4</i>   | 2.95223 | 3.44592 | 2.44346 | 2.10415 | 1.40692584 |
| <i>ZmWRKY62</i>  | 1.4945  | 1.68927 | 1.20817 | 1.06644 | 1.39969929 |
| <i>ZmWRKY56</i>  | 1.96876 | 3.06814 | 1.84749 | 1.76483 | 1.39436705 |
| <i>ZmWRKY70</i>  | 33.5666 | 59.7265 | 36.8117 | 31.3749 | 1.36820284 |
| <i>ZmWRKY22</i>  | 31.8059 | 29.2978 | 24.5894 | 20.5337 | 1.35415563 |
| <i>ZmWRKY48</i>  | 9.86635 | 9.32924 | 6.49948 | 7.71613 | 1.35031771 |
| <i>ZmWRKY6</i>   | 15.2129 | 18.0396 | 12.5246 | 12.5505 | 1.32611635 |
| <i>ZmWRKY53</i>  | 1.40512 | 1.11111 | 1.24383 | 0.72149 | 1.28031763 |
| <i>ZmWRKY99</i>  | 1.12577 | 1.14311 | 0.95713 | 0.83023 | 1.2694086  |
| <i>ZmWRKY114</i> | 14.7954 | 10.3799 | 9.02771 | 11.5787 | 1.22172178 |
| <i>ZmWRKY74</i>  | 0.49501 | 0.91182 | 0.52893 | 0.63437 | 1.20935052 |
| <i>ZmWRKY106</i> | 17.4794 | 19.6753 | 17.2616 | 13.8647 | 1.19367544 |
| <i>ZmWRKY92</i>  | 37.1598 | 56.0039 | 43.9462 | 34.1269 | 1.19328809 |
| <i>ZmWRKY102</i> | 11.0135 | 9.71195 | 10.6711 | 6.72007 | 1.19172258 |
| <i>ZmWRKY30</i>  | 9.08967 | 6.83654 | 6.82953 | 6.68617 | 1.17834888 |
| <i>ZmWRKY52</i>  | 10.1831 | 12.9756 | 12.4054 | 14.0459 | 1.14217551 |
| <i>ZmWRKY23</i>  | 10.1431 | 10.6467 | 8.688   | 9.6748  | 1.13216939 |
| <i>ZmWRKY81</i>  | 13.5669 | 13.4099 | 11.3913 | 12.6114 | 1.12390689 |
| <i>ZmWRKY88</i>  | 4.57697 | 1.87766 | 3.19908 | 2.55372 | 1.12199798 |
| <i>ZmWRKY78</i>  | 73.6462 | 112.338 | 94.9595 | 71.6976 | 1.11596926 |
| <i>ZmWRKY91</i>  | 73.6502 | 112.355 | 94.9921 | 71.7208 | 1.1157217  |
| <i>ZmWRKY44</i>  | 0.24231 | 0.47162 | 0.44101 | 0.20897 | 1.09838288 |
| <i>ZmWRKY27</i>  | 1.45203 | 2.15172 | 1.88262 | 1.4379  | 1.08529688 |
| <i>ZmWRKY28</i>  | 2.44161 | 2.51228 | 2.1374  | 2.47611 | 1.07377897 |
| <i>ZmWRKY47</i>  | 12.2781 | 10.3947 | 10.4926 | 10.7131 | 1.06918423 |
| <i>ZmWRKY50</i>  | 3.55365 | 2.56515 | 3.10404 | 2.661   | 1.06136297 |
| <i>ZmWRKY26</i>  | 3.13925 | 4.97089 | 6.08765 | 1.58715 | 1.0567233  |
| <i>ZmbZIP84</i>  | 0.43231 | 0.30767 | 5.86895 | 7.96276 | 18.6919041 |
| <i>ZmbZIP6</i>   | 1.16223 | 0.34625 | 3.82436 | 3.47951 | 4.84188999 |
| <i>ZmbZIP100</i> | 0.43542 | 0.08274 | 0.75418 | 0.89369 | 3.18021707 |
| <i>ZmbZIP69</i>  | 0.9398  | 0       | 1.56203 | 1.24216 | 2.98381571 |
| <i>ZmbZIP106</i> | 1.82414 | 0.23588 | 3.69536 | 2.30279 | 2.91170069 |
| <i>ZmbZIP41</i>  | 1.7     | 0.32504 | 3.65077 | 1.89702 | 2.73959797 |
| <i>ZmbZIP43</i>  | 1.84878 | 1.11175 | 3.25008 | 4.00592 | 2.45091251 |

|           |         |         |         |         |            |
|-----------|---------|---------|---------|---------|------------|
| ZmbZIP35  | 17.5375 | 17.9373 | 41.7772 | 43.9754 | 2.41728213 |
| ZmbZIP37  | 2.29609 | 2.38092 | 5.24958 | 5.75879 | 2.35371958 |
| ZmbZIP36  | 9.49545 | 9.98699 | 23.2663 | 21.9625 | 2.3215162  |
| ZmbZIP124 | 1.08669 | 0.79833 | 2.3268  | 1.97867 | 2.2840411  |
| ZmbZIP42  | 0.77268 | 0.51925 | 1.49679 | 1.42244 | 2.25958837 |
| ZmbZIP32  | 2.39642 | 2.08707 | 4.79319 | 4.29676 | 2.02742729 |
| ZmbZIP1   | 0.74331 | 0.62172 | 1.57161 | 0.95907 | 1.85393519 |
| ZmbZIP56  | 1.00032 | 0.04593 | 0.77125 | 1.08645 | 1.77557563 |
| ZmbZIP13  | 13.8822 | 13.1816 | 24.0237 | 23.4852 | 1.75544085 |
| ZmbZIP92  | 2.2754  | 3.03724 | 4.64177 | 4.09859 | 1.64520088 |
| ZmbZIP53  | 3.4118  | 2.95725 | 5.38441 | 4.86115 | 1.60864807 |
| ZmbZIP19  | 1.07438 | 0.34089 | 1.14409 | 1.09085 | 1.57915823 |
| ZmbZIP83  | 16.2687 | 15.8841 | 24.6327 | 25.583  | 1.56178311 |
| ZmbZIP70  | 6.29082 | 4.21744 | 7.04737 | 8.48336 | 1.47795449 |
| ZmbZIP95  | 0.83304 | 0.17566 | 0.79641 | 0.64161 | 1.42562167 |
| ZmbZIP14  | 9.95715 | 8.17074 | 12.9311 | 12.2427 | 1.38867789 |
| ZmbZIP55  | 11.8584 | 9.98093 | 15.5832 | 14.5622 | 1.38032623 |
| ZmbZIP46  | 6.09383 | 5.50396 | 8.14348 | 7.77714 | 1.37272877 |
| ZmbZIP5   | 6.77865 | 5.67765 | 8.45877 | 7.85342 | 1.3095534  |
| ZmbZIP20  | 18.8282 | 16.4287 | 22.7506 | 22.5262 | 1.28419685 |
| ZmbZIP47  | 3.03593 | 2.21255 | 2.86339 | 3.56343 | 1.22451072 |
| ZmbZIP21  | 8.36574 | 6.57641 | 7.96724 | 9.74301 | 1.18525446 |
| ZmbZIP28  | 19.733  | 19.7826 | 23.4429 | 23.0921 | 1.17763617 |
| ZmbZIP113 | 3.55836 | 0.62465 | 2.78898 | 2.12437 | 1.17459592 |
| ZmbZIP102 | 7.73061 | 5.62325 | 6.78456 | 8.86284 | 1.17175109 |
| ZmbZIP73  | 29.4954 | 26.2532 | 34.8015 | 30.1815 | 1.16564362 |
| ZmbZIP119 | 15.2035 | 11.5236 | 15.1044 | 14.881  | 1.12190997 |
| ZmbZIP16  | 11.8918 | 13.5759 | 15.2348 | 13.1562 | 1.11478461 |
| ZmbZIP17  | 11.8918 | 13.5759 | 15.2348 | 13.1562 | 1.11478461 |
| ZmbZIP2   | 20.8042 | 19.9512 | 22.9859 | 21.4847 | 1.09115847 |
| ZmbZIP86  | 4.78169 | 4.76054 | 5.16326 | 5.21395 | 1.08750365 |
| ZmbZIP65  | 37.3511 | 44.6348 | 44.6348 | 43.2089 | 1.07144887 |
| ZmbZIP107 | 8.47749 | 7.66336 | 8.14744 | 8.64044 | 1.04008649 |
| ZmbZIP90  | 7.51725 | 6.8572  | 7.33668 | 7.58561 | 1.03811207 |
| ZmbZIP48  | 1.53654 | 1.22689 | 1.43316 | 1.41025 | 1.02894229 |
| ZmbZIP91  | 0.80617 | 0.61602 | 0.80462 | 0.64789 | 1.02131715 |
| ZmbZIP9   | 59.231  | 184.83  | 49.2631 | 13.1412 | 3.91096447 |
| ZmbZIP44  | 26.6806 | 20.8194 | 6.71486 | 7.28813 | 3.39213268 |
| ZmbZIP22  | 54.0905 | 49.6488 | 18.6616 | 20.8049 | 2.62854066 |
| ZmbZIP7   | 24.6749 | 29.7253 | 13.0836 | 7.66196 | 2.62225749 |
| ZmbZIP87  | 150.611 | 193.08  | 69.8106 | 66.8718 | 2.51452272 |
| ZmbZIP121 | 2.59467 | 1.88698 | 1.06482 | 0.85994 | 2.3284238  |
| ZmbZIP82  | 9.6966  | 12.7359 | 5.8152  | 4.77157 | 2.11891823 |

|           |         |         |         |         |            |
|-----------|---------|---------|---------|---------|------------|
| ZmbZIP88  | 7.01374 | 7.67412 | 3.78603 | 3.49636 | 2.01690104 |
| ZmbZIP108 | 8.59122 | 4.40667 | 3.77378 | 2.87419 | 1.95516677 |
| ZmbZIP105 | 2.15133 | 3.26567 | 1.53992 | 1.29549 | 1.91048208 |
| ZmbZIP8   | 138.946 | 114.575 | 70.794  | 71.9543 | 1.77600013 |
| ZmbZIP81  | 11.0213 | 9.46859 | 7.23068 | 4.73756 | 1.71202198 |
| ZmbZIP67  | 35.4644 | 10.1259 | 14.6604 | 12.5617 | 1.67475323 |
| ZmbZIP45  | 30.3006 | 31.0442 | 18.6359 | 17.9948 | 1.67468271 |
| ZmbZIP31  | 38.3861 | 28.6641 | 24.2478 | 16.3045 | 1.65342533 |
| ZmbZIP50  | 1.51139 | 2.939   | 1.34195 | 1.35977 | 1.64724324 |
| ZmbZIP97  | 32.3217 | 15.5259 | 14.6085 | 14.4568 | 1.64621043 |
| ZmbZIP94  | 1.21971 | 1.33063 | 0.84093 | 0.72703 | 1.62653073 |
| ZmbZIP59  | 16.9394 | 23.6404 | 14.3127 | 11.4901 | 1.57268979 |
| ZmbZIP38  | 3.62642 | 5.33409 | 3.2242  | 2.50636 | 1.56363601 |
| ZmbZIP112 | 86.7683 | 121.103 | 79.2577 | 54.1783 | 1.55783522 |
| ZmbZIP40  | 2.15771 | 2.81595 | 1.95675 | 1.24598 | 1.55294389 |
| ZmbZIP125 | 26.962  | 19.7805 | 16.1713 | 14.8581 | 1.50639394 |
| ZmbZIP111 | 5.67477 | 5.21965 | 3.86856 | 3.38097 | 1.50277604 |
| ZmbZIP117 | 1.24823 | 0.91373 | 0.88649 | 0.56507 | 1.48940553 |
| ZmbZIP122 | 0.44203 | 0.22471 | 0.39241 | 0.06253 | 1.46553202 |
| ZmbZIP68  | 3.60198 | 4.98967 | 2.92401 | 3.18935 | 1.40538918 |
| ZmbZIP23  | 55.6491 | 56.6068 | 47.2566 | 35.1114 | 1.36285815 |
| ZmbZIP103 | 4.3928  | 4.68866 | 3.66771 | 3.04432 | 1.35301243 |
| ZmbZIP79  | 13.3826 | 13.1928 | 10.2487 | 9.5421  | 1.34281585 |
| ZmbZIP33  | 19.8583 | 24.4089 | 17.8746 | 15.819  | 1.31381627 |
| ZmbZIP64  | 26.08   | 27.5307 | 22.3149 | 20.0661 | 1.26497015 |
| ZmbZIP34  | 16.7417 | 15.237  | 12.9298 | 13.219  | 1.22295096 |
| ZmbZIP18  | 9.5335  | 6.31775 | 6.03106 | 6.93857 | 1.22218213 |
| ZmbZIP71  | 0.33719 | 0.21883 | 0.2798  | 0.18354 | 1.20001683 |
| ZmbZIP98  | 7.73521 | 6.77845 | 7.0267  | 5.11116 | 1.19573467 |
| ZmbZIP39  | 27.4974 | 28.0702 | 21.73   | 24.9819 | 1.18958124 |
| ZmbZIP49  | 1.71442 | 2.72182 | 1.32384 | 2.416   | 1.18621117 |
| ZmbZIP74  | 62.1063 | 72.3442 | 62.9911 | 51.3309 | 1.17606847 |
| ZmbZIP4   | 35.2404 | 40.3305 | 35.0426 | 29.2922 | 1.17465042 |
| ZmbZIP96  | 9.74165 | 9.23455 | 8.07512 | 8.14767 | 1.16972481 |
| ZmbZIP12  | 0.62382 | 0.79435 | 0.38644 | 0.84402 | 1.15255221 |
| ZmbZIP114 | 27.6806 | 32.5734 | 28.2177 | 24.9062 | 1.13421643 |
| ZmbZIP99  | 12.1473 | 13.7542 | 10.9748 | 11.8844 | 1.13308865 |
| ZmbZIP76  | 17.1975 | 16.359  | 14.9068 | 14.9882 | 1.12247868 |
| ZmbZIP26  | 10.9654 | 10.7342 | 9.38225 | 10.0233 | 1.11821618 |
| ZmbZIP120 | 19.0813 | 19.4953 | 19.6432 | 15.5046 | 1.09755376 |
| ZmbZIP93  | 63.676  | 64.5058 | 65.4251 | 53.4145 | 1.07861184 |
| ZmbZIP110 | 89.5636 | 78.8987 | 83.1657 | 74.7613 | 1.06670994 |
| ZmbZIP58  | 18.325  | 21.1005 | 19.1721 | 18.0905 | 1.0580448  |



---

|                  |         |         |         |         |            |
|------------------|---------|---------|---------|---------|------------|
| <i>ZmbZIP63</i>  | 3.79831 | 4.30785 | 4.03213 | 3.70083 | 1.04826095 |
| <i>ZmbZIP123</i> | 2.79496 | 2.00902 | 2.54147 | 2.05935 | 1.04415735 |
| <i>ZmbZIP101</i> | 1.03145 | 1.06617 | 1.01199 | 1.02646 | 1.02902696 |
| <i>ZmbZIP60</i>  | 17.3119 | 20.3538 | 17.8195 | 19.0778 | 1.02082537 |
| <i>ZmbZIP62</i>  | 28.127  | 31.8442 | 0       | 0       | -          |

---
