# Supplementary material for: Maize protein phosphatase gene family: identification and molecular characterization
Source: PubMed Central journal article supplement (PMC4169795; doi:10.1186/1471-2164-15-773), 2014-09-09
Supplement: 12864_2014_6458_MOESM20_ESM.pdf [file 12864_2014_6458_MOESM20_ESM.pdf]

**Table S10.** List of putative components involved in ABA biosynthesis and ABA-dependent pathway of response to drought in maize.

| <b>Name</b> | <b>Gene ID</b>   | <b>Protein ID</b> | <b>Class</b> |
|-------------|------------------|-------------------|--------------|
| ZmZEP1      | GRMZM2G127139    | GRMZM2G127139_P01 | ZEP          |
| ZmZEP2      | GRMZM2G127139    | GRMZM2G127139_P02 | ZEP          |
| VP14        | GRMZM2G014392    | GRMZM2G014392_P01 | NCED         |
| ZmNCED3     | GRMZM5G838285    | GRMZM5G838285_P01 | NCED         |
| ZmNCED5     | GRMZM2G417954    | GRMZM2G417954_P01 | NCED         |
| ZmABA3      | GRMZM2G081571    | GRMZM2G081571_P04 | ABA3         |
| ZmA01       | GRMZM2G141535    | GRMZM2G141535_P01 | AAO          |
| ZmA02       | GRMZM2G141473    | GRMZM2G141473_P01 | AAO          |
| ZmRACR1     | GRMZM2G063882    | GRMZM2G063882_P01 | ABA receptor |
| ZmRACR2     | GRMZM2G048733    | GRMZM2G048733_P02 | ABA receptor |
| ZmRACR3     | GRMZM2G405064    | GRMZM2G405064_P01 | ABA receptor |
| ZmRACR4     | GRMZM2G165567    | GRMZM2G165567_P02 | ABA receptor |
| ZmRACR5     | GRMZM2G133631    | GRMZM2G133631_P01 | ABA receptor |
| ZmRACR6     | GRMZM2G144224    | GRMZM2G144224_P01 | ABA receptor |
| ZmRACR7     | GRMZM2G057959    | GRMZM2G057959_P01 | ABA receptor |
| ZmRACR8     | GRMZM2G047677    | GRMZM2G047677_P01 | ABA receptor |
| ZmRACR9     | GRMZM2G169695    | GRMZM2G169695_P01 | ABA receptor |
| ZmRACR10    | GRMZM2G141382    | GRMZM2G141382_P01 | ABA receptor |
| ZmRACR11    | GRMZM2G134731    | GRMZM2G134731_P01 | ABA receptor |
| ZmRACR12    | AC194914.3_FG002 | AC194914.3_FGP002 | ABA receptor |
| ZmRACR13    | GRMZM2G154987    | GRMZM2G154987_P01 | ABA receptor |
| ZmPP6       | GRMZM2G010855    | GRMZM2G010855_P01 | PP2C         |
| ZmPP31      | GRMZM2G019819    | GRMZM2G019819_P01 | PP2C         |
| ZmPP39      | GRMZM2G082487    | GRMZM2G082487_P01 | PP2C         |
| ZmPP53      | GRMZM2G059453    | GRMZM2G059453_P01 | PP2C         |
| ZmPP56      | GRMZM2G122228    | GRMZM2G122228_P01 | PP2C         |
| ZmPP57      | GRMZM2G134628    | GRMZM2G134628_P01 | PP2C         |
| ZmPP107     | GRMZM2G177386    | GRMZM2G177386_P02 | PP2C         |
| ZmPP108     | GRMZM2G102255    | GRMZM2G102255_P01 | PP2C         |
| ZmPP112     | GRMZM2G308615    | GRMZM2G308615_P01 | PP2C         |
| ZmPP121     | GRMZM5G818101    | GRMZM5G818101_P02 | PP2C         |
| ZmPP123     | GRMZM2G383807    | GRMZM2G383807_P01 | PP2C         |
| ZmPP127     | GRMZM2G001243    | GRMZM2G001243_P01 | PP2C         |
| ZmPP130     | GRMZM2G300125    | GRMZM2G300125_P01 | PP2C         |
| ZmPP132     | GRMZM2G166297    | GRMZM2G166297_P01 | PP2C         |
| ZmPP134     | GRMZM2G149132    | GRMZM2G149132_P01 | PP2C         |
| ZmPP154     | GRMZM2G159811    | GRMZM2G159811_P01 | PP2C         |
| ZmPP8       | AC208201.3_FG002 | AC208201.3_FGP002 | PP2C         |
| ZmPP43      | GRMZM2G342197    | GRMZM2G342197_P01 | PP2C         |
| ZmPP60      | GRMZM2G407605    | GRMZM2G407605_P01 | PP2C         |

---

|         |                  |                   |      |
|---------|------------------|-------------------|------|
| ZmPP61  | GRMZM2G407623    | GRMZM2G407623_P01 | PP2C |
| ZmPP97  | GRMZM2G000603    | GRMZM2G000603_P01 | PP2C |
| ZmPP147 | GRMZM2G465287    | GRMZM2G465287_P01 | PP2C |
| ZmPP7   | GRMZM2G112925    | GRMZM2G112925_P01 | PP2C |
| ZmPP24  | GRMZM2G093776    | GRMZM2G093776_P01 | PP2C |
| ZmPP30  | GRMZM2G016749    | GRMZM2G016749_P01 | PP2C |
| ZmPP77  | GRMZM2G144109    | GRMZM2G144109_P01 | PP2C |
| ZmPP126 | GRMZM2G141859    | GRMZM2G141859_P01 | PP2C |
| ZmPP148 | GRMZM2G103247    | GRMZM2G103247_P01 | PP2C |
| ZmPP155 | GRMZM2G443509    | GRMZM2G443509_P01 | PP2C |
| ZmPP2   | AC155624.2_FG006 | AC155624.2_FGP006 | PP2C |
| ZmPP3   | GRMZM5G833774    | GRMZM5G833774_P01 | PP2C |
| ZmPP4   | GRMZM5G891266    | GRMZM5G891266_P01 | PP2C |
| ZmPP21  | GRMZM2G050512    | GRMZM2G050512_P01 | PP2C |
| ZmPP25  | GRMZM2G156543    | GRMZM2G156543_P01 | PP2C |
| ZmPP28  | GRMZM2G479665    | GRMZM2G479665_P01 | PP2C |
| ZmPP80  | GRMZM2G377904    | GRMZM2G377904_P01 | PP2C |
| ZmPP83  | GRMZM2G069970    | GRMZM2G069970_P01 | PP2C |
| ZmPP92  | GRMZM2G057907    | GRMZM2G057907_P01 | PP2C |
| ZmPP99  | GRMZM2G151254    | GRMZM2G151254_P01 | PP2C |
| ZmPP144 | GRMZM2G108309    | GRMZM2G108309_P01 | PP2C |
| ZmPP149 | GRMZM2G130943    | GRMZM2G130943_P02 | PP2C |
| ZmPP151 | GRMZM2G010017    | GRMZM2G010017_P01 | PP2C |
| ZmPP12  | GRMZM2G170299    | GRMZM2G170299_P01 | PP2C |
| ZmPP35  | GRMZM2G153675    | GRMZM2G153675_P01 | PP2C |
| ZmPP41  | GRMZM2G021610    | GRMZM2G021610_P01 | PP2C |
| ZmPP63  | GRMZM2G120246    | GRMZM2G120246_P01 | PP2C |
| ZmPP69  | GRMZM2G071196    | GRMZM2G071196_P01 | PP2C |
| ZmPP70  | GRMZM2G067910    | GRMZM2G067910_P01 | PP2C |
| ZmPP71  | GRMZM2G053722    | GRMZM2G053722_P01 | PP2C |
| ZmPP74  | GRMZM2G040452    | GRMZM2G040452_P03 | PP2C |
| ZmPP87  | GRMZM2G119623    | GRMZM2G119623_P01 | PP2C |
| ZmPP89  | GRMZM2G102560    | GRMZM2G102560_P02 | PP2C |
| ZmPP105 | GRMZM2G069713    | GRMZM2G069713_P01 | PP2C |
| ZmPP116 | GRMZM2G107565    | GRMZM2G107565_P01 | PP2C |
| ZmPP117 | GRMZM2G161544    | GRMZM2G161544_P01 | PP2C |
| ZmPP128 | GRMZM2G136765    | GRMZM2G136765_P01 | PP2C |
| ZmPP27  | GRMZM2G111232    | GRMZM2G111232_P01 | PP2C |
| ZmPP40  | GRMZM2G311187    | GRMZM2G311187_P01 | PP2C |
| ZmPP115 | GRMZM2G010298    | GRMZM2G010298_P01 | PP2C |
| ZmPP152 | GRMZM2G074489    | GRMZM2G074489_P02 | PP2C |
| ZmPP158 | GRMZM2G155991    | GRMZM2G155991_P01 | PP2C |
| ZmPP159 | GRMZM2G180471    | GRMZM2G180471_P01 | PP2C |

---

---

|           |                  |                   |       |
|-----------|------------------|-------------------|-------|
| ZmPP26    | GRMZM2G056572    | GRMZM2G056572_P02 | PP2C  |
| ZmPP72    | GRMZM2G073788    | GRMZM2G073788_P01 | PP2C  |
| ZmPP76    | GRMZM2G166035    | GRMZM2G166035_P01 | PP2C  |
| ZmPP84    | GRMZM5G829894    | GRMZM5G829894_P01 | PP2C  |
| ZmPP86    | GRMZM2G442404    | GRMZM2G442404_P01 | PP2C  |
| ZmPP109   | GRMZM2G412937    | GRMZM2G412937_P01 | PP2C  |
| ZmPP122   | GRMZM2G158818    | GRMZM2G158818_P01 | PP2C  |
| ZmPP129   | GRMZM2G040642    | GRMZM2G040642_P01 | PP2C  |
| ZmPP10    | GRMZM2G057768    | GRMZM2G057768_P02 | PP2C  |
| ZmPP66    | GRMZM2G108147    | GRMZM2G108147_P02 | PP2C  |
| ZmPP95    | GRMZM2G180430    | GRMZM2G180430_P01 | PP2C  |
| ZmPP111   | GRMZM2G126832    | GRMZM2G126832_P02 | PP2C  |
| ZmPP137   | GRMZM2G158734    | GRMZM2G158734_P01 | PP2C  |
| ZmPP143   | GRMZM2G009163    | GRMZM2G009163_P01 | PP2C  |
| ZmPP153   | GRMZM2G060798    | GRMZM2G060798_P01 | PP2C  |
| ZmPP9     | GRMZM2G077960    | GRMZM2G077960_P01 | PP2C  |
| ZmPP29    | GRMZM2G015610    | GRMZM2G015610_P01 | PP2C  |
| ZmPP42    | GRMZM5G836628    | GRMZM5G836628_P02 | PP2C  |
| ZmPP49    | GRMZM2G173734    | GRMZM2G173734_P01 | PP2C  |
| ZmPP64    | GRMZM2G081359    | GRMZM2G081359_P03 | PP2C  |
| ZmPP90    | GRMZM2G052699    | GRMZM2G052699_P01 | PP2C  |
| ZmPP113   | GRMZM2G135444    | GRMZM2G135444_P01 | PP2C  |
| ZmPP118   | GRMZM2G113016    | GRMZM2G113016_P01 | PP2C  |
| ZmPP141   | GRMZM2G150213    | GRMZM2G150213_P01 | PP2C  |
| ZmPP146   | GRMZM2G006429    | GRMZM2G006429_P01 | PP2C  |
| ZmPP156   | GRMZM2G044382    | GRMZM2G044382_P01 | PP2C  |
| ZmPP85    | GRMZM2G360455    | GRMZM2G360455_P02 | PP2C  |
| ZmPP100   | GRMZM2G019812    | GRMZM2G019812_P01 | PP2C  |
| ZmPP114   | GRMZM2G006416    | GRMZM2G006416_P02 | PP2C  |
| ZmPP138   | GRMZM2G047376    | GRMZM2G047376_P01 | PP2C  |
| ZmPP139   | GRMZM2G104076    | GRMZM2G104076_P02 | PP2C  |
| ZmPP157   | GRMZM2G109496    | GRMZM2G109496_P05 | PP2C  |
| ZmPP23    | GRMZM2G134227    | GRMZM2G134227_P01 | PP2C  |
| ZmPP46    | GRMZM2G003096    | GRMZM2G003096_P01 | PP2C  |
| ZmPP78    | AC210013.4_FG011 | AC210013.4_FGP011 | PP2C  |
| ZmPP82    | GRMZM2G071087    | GRMZM2G071087_P01 | PP2C  |
| ZmPP91    | GRMZM2G159904    | GRMZM2G159904_P01 | PP2C  |
| ZmPP142   | AC217887.3_FG001 | AC217887.3_FGP001 | PP2C  |
| ZmPP44    | GRMZM2G053713    | GRMZM2G053713_P01 | PP2C  |
| ZmPP37    | GRMZM2G150608    | GRMZM2G150608_P01 | PP2C  |
| ZmPP58    | GRMZM2G372297    | GRMZM2G372297_P01 | PP2C  |
| ZmPP110   | GRMZM2G042627    | GRMZM2G042627_P01 | PP2C  |
| ZmSnRK2.1 | GRMZM2G180916    | GRMZM2G180916_P04 | SnRK2 |

---

---

|            |               |                   |       |
|------------|---------------|-------------------|-------|
| ZmSnRK2.2  | GRMZM2G081915 | GRMZM2G081915_P02 | SnRK2 |
| ZmSnRK2.3  | GRMZM2G138861 | GRMZM2G138861_P04 | SnRK2 |
| ZmSnRK2.4  | GRMZM2G155593 | GRMZM2G155593_P01 | SnRK2 |
| ZmSnRK2.5  | GRMZM2G110922 | GRMZM2G110922_P01 | SnRK2 |
| ZmSnRK2.6  | GRMZM2G130018 | GRMZM2G130018_P01 | SnRK2 |
| ZmSnRK2.7  | GRMZM2G171435 | GRMZM2G171435_P01 | SnRK2 |
| ZmSnRK2.8  | GRMZM2G066867 | GRMZM2G066867_P01 | SnRK2 |
| ZmSnRK2.9  | GRMZM2G000278 | GRMZM2G000278_P03 | SnRK2 |
| ZmSnRK2.10 | GRMZM2G063961 | GRMZM2G063961_P01 | SnRK2 |
| ZmSnRK2.11 | GRMZM2G056732 | GRMZM2G056732_P02 | SnRK2 |
| ZmSnRK2.12 | GRMZM2G334791 | GRMZM2G334791_P03 | SnRK2 |
| ZmSnRK2.13 | GRMZM2G035809 | GRMZM2G035809_P01 | SnRK2 |
| ZmSnRK2.14 | GRMZM2G110908 | GRMZM2G110908_P01 | SnRK2 |
| ZmWRKY1    | GRMZM2G030272 | GRMZM2G030272_P01 | WRKY  |
| ZmWRKY2    | GRMZM2G425430 | GRMZM2G425430_P01 | WRKY  |
| ZmWRKY3    | GRMZM2G383594 | GRMZM2G383594_P01 | WRKY  |
| ZmWRKY4    | GRMZM2G130374 | GRMZM2G130374_P01 | WRKY  |
| ZmWRKY5    | GRMZM2G324999 | GRMZM2G324999_P01 | WRKY  |
| ZmWRKY6    | GRMZM2G070211 | GRMZM2G070211_P01 | WRKY  |
| ZmWRKY7    | GRMZM2G149219 | GRMZM2G149219_P01 | WRKY  |
| ZmWRKY8    | GRMZM2G018487 | GRMZM2G018487_P01 | WRKY  |
| ZmWRKY9.1  | GRMZM2G143204 | GRMZM2G143204_P01 | WRKY  |
| ZmWRKY9.2  | GRMZM2G143204 | GRMZM2G143204_P02 | WRKY  |
| ZmWRKY10   | GRMZM2G008029 | GRMZM2G008029_P01 | WRKY  |
| ZmWRKY11   | GRMZM2G164082 | GRMZM2G164082_P01 | WRKY  |
| ZmWRKY12   | GRMZM2G083717 | GRMZM2G083717_P01 | WRKY  |
| ZmWRKY13.1 | GRMZM2G071907 | GRMZM2G071907_P03 | WRKY  |
| ZmWRKY13.2 | GRMZM2G071907 | GRMZM2G071907_P01 | WRKY  |
| ZmWRKY14   | GRMZM2G024898 | GRMZM2G024898_P01 | WRKY  |
| ZmWRKY15.1 | GRMZM2G123387 | GRMZM2G123387_P01 | WRKY  |
| ZmWRKY15.2 | GRMZM2G123387 | GRMZM2G123387_P02 | WRKY  |
| ZmWRKY16   | GRMZM5G816457 | GRMZM5G816457_P01 | WRKY  |
| ZmWRKY17   | GRMZM2G102583 | GRMZM2G102583_P02 | WRKY  |
| ZmWRKY18   | GRMZM2G400559 | GRMZM2G400559_P01 | WRKY  |
| ZmWRKY19   | GRMZM2G099593 | GRMZM2G099593_P01 | WRKY  |
| ZmWRKY20   | GRMZM2G163418 | GRMZM2G163418_P01 | WRKY  |
| ZmWRKY21   | GRMZM2G057011 | GRMZM2G057011_P01 | WRKY  |
| ZmWRKY22   | GRMZM2G052671 | GRMZM2G052671_P01 | WRKY  |
| ZmWRKY23   | GRMZM2G130854 | GRMZM2G130854_P01 | WRKY  |
| ZmWRKY24   | GRMZM2G106560 | GRMZM2G106560_P01 | WRKY  |
| ZmWRKY25.1 | GRMZM5G871347 | GRMZM5G871347_P01 | WRKY  |
| ZmWRKY25.2 | GRMZM5G871347 | GRMZM5G871347_P02 | WRKY  |
| ZmWRKY25.3 | GRMZM5G871347 | GRMZM5G871347_P03 | WRKY  |

---

---

|            |                  |                   |      |
|------------|------------------|-------------------|------|
| ZmWRKY26   | GRMZM2G475984    | GRMZM2G475984_P01 | WRKY |
| ZmWRKY27   | GRMZM2G176489    | GRMZM2G176489_P01 | WRKY |
| ZmWRKY28   | GRMZM2G151444    | GRMZM2G151444_P01 | WRKY |
| ZmWRKY29   | GRMZM2G327349    | GRMZM2G327349_P01 | WRKY |
| ZmWRKY30   | GRMZM2G173680    | GRMZM2G173680_P01 | WRKY |
| ZmWRKY31   | GRMZM2G076657    | GRMZM2G076657_P01 | WRKY |
| ZmWRKY32   | AC165171.2_FG002 | AC165171.2_FGP002 | WRKY |
| ZmWRKY33   | GRMZM2G148087    | GRMZM2G148087_P01 | WRKY |
| ZmWRKY34   | GRMZM2G059562    | GRMZM2G059562_P01 | WRKY |
| ZmWRKY35   | GRMZM2G158328    | GRMZM2G158328_P01 | WRKY |
| ZmWRKY36   | GRMZM2G065290    | GRMZM2G065290_P01 | WRKY |
| ZmWRKY37   | GRMZM2G382350    | GRMZM2G382350_P01 | WRKY |
| ZmWRKY38.1 | GRMZM2G141299    | GRMZM2G141299_P02 | WRKY |
| ZmWRKY38.2 | GRMZM2G141299    | GRMZM2G141299_P01 | WRKY |
| ZmWRKY39   | GRMZM2G040298    | GRMZM2G040298_P01 | WRKY |
| ZmWRKY40   | GRMZM2G101405    | GRMZM2G101405_P01 | WRKY |
| ZmWRKY41   | GRMZM2G151763    | GRMZM2G151763_P01 | WRKY |
| ZmWRKY42   | GRMZM2G408462    | GRMZM2G408462_P01 | WRKY |
| ZmWRKY43   | AC198725.4_FG009 | AC198725.4_FGP009 | WRKY |
| ZmWRKY44   | GRMZM2G105140    | GRMZM2G105140_P01 | WRKY |
| ZmWRKY45   | GRMZM2G354384    | GRMZM2G354384_P01 | WRKY |
| ZmWRKY46   | GRMZM2G054125    | GRMZM2G054125_P01 | WRKY |
| ZmWRKY47   | GRMZM2G549512    | GRMZM2G549512_P01 | WRKY |
| ZmWRKY48   | GRMZM2G148561    | GRMZM2G148561_P01 | WRKY |
| ZmWRKY49   | AC205562.3_FG002 | AC205562.3_FGP002 | WRKY |
| ZmWRKY50   | GRMZM2G377217    | GRMZM2G377217_P01 | WRKY |
| ZmWRKY51   | GRMZM2G138683    | GRMZM2G138683_P01 | WRKY |
| ZmWRKY52   | GRMZM2G063216    | GRMZM2G063216_P01 | WRKY |
| ZmWRKY53   | GRMZM2G451035    | GRMZM2G451035_P01 | WRKY |
| ZmWRKY54   | GRMZM2G461648    | GRMZM2G461648_P01 | WRKY |
| ZmWRKY55   | GRMZM2G169564    | GRMZM2G169564_P01 | WRKY |
| ZmWRKY56   | GRMZM2G027972    | GRMZM2G027972_P01 | WRKY |
| ZmWRKY57   | GRMZM2G038158    | GRMZM2G038158_P01 | WRKY |
| ZmWRKY58   | GRMZM2G147880    | GRMZM2G147880_P01 | WRKY |
| ZmWRKY59   | GRMZM2G161411    | GRMZM2G161411_P01 | WRKY |
| ZmWRKY60   | GRMZM5G880069    | GRMZM5G880069_P02 | WRKY |
| ZmWRKY61   | GRMZM2G120320    | GRMZM2G120320_P01 | WRKY |
| ZmWRKY62   | GRMZM2G048450    | GRMZM2G048450_P01 | WRKY |
| ZmWRKY63   | GRMZM2G073272    | GRMZM2G073272_P01 | WRKY |
| ZmWRKY64   | GRMZM5G823157    | GRMZM5G823157_P01 | WRKY |
| ZmWRKY65   | GRMZM2G143765    | GRMZM2G143765_P01 | WRKY |
| ZmWRKY66   | AC209050.3_FG003 | AC209050.3_FGP003 | WRKY |
| ZmWRKY67   | GRMZM2G156529    | GRMZM2G156529_P01 | WRKY |

---

---

|            |               |                   |      |
|------------|---------------|-------------------|------|
| ZmWRKY68.1 | GRMZM2G163054 | GRMZM2G163054_P04 | WRKY |
| ZmWRKY68.2 | GRMZM2G163054 | GRMZM2G163054_P02 | WRKY |
| ZmWRKY69   | GRMZM2G127064 | GRMZM2G127064_P01 | WRKY |
| ZmWRKY70.1 | GRMZM2G012724 | GRMZM2G012724_P01 | WRKY |
| ZmWRKY70.2 | GRMZM2G012724 | GRMZM2G012724_P03 | WRKY |
| ZmWRKY70.3 | GRMZM2G012724 | GRMZM2G012724_P04 | WRKY |
| ZmWRKY71   | GRMZM2G169966 | GRMZM2G169966_P01 | WRKY |
| ZmWRKY72   | GRMZM2G401521 | GRMZM2G401521_P01 | WRKY |
| ZmWRKY73   | GRMZM5G863420 | GRMZM5G863420_P01 | WRKY |
| ZmWRKY74   | GRMZM2G453571 | GRMZM2G453571_P01 | WRKY |
| ZmWRKY75.1 | GRMZM2G366795 | GRMZM2G366795_P01 | WRKY |
| ZmWRKY75.2 | GRMZM2G366795 | GRMZM2G366795_P02 | WRKY |
| ZmWRKY76   | GRMZM2G018721 | GRMZM2G018721_P01 | WRKY |
| ZmWRKY77   | GRMZM2G139815 | GRMZM2G139815_P01 | WRKY |
| ZmWRKY78   | GRMZM2G025895 | GRMZM2G025895_P01 | WRKY |
| ZmWRKY79.1 | GRMZM2G125653 | GRMZM2G125653_P01 | WRKY |
| ZmWRKY79.2 | GRMZM2G125653 | GRMZM2G125653_P02 | WRKY |
| ZmWRKY80   | GRMZM2G169149 | GRMZM2G169149_P01 | WRKY |
| ZmWRKY81.1 | GRMZM2G151407 | GRMZM2G151407_P01 | WRKY |
| ZmWRKY81.2 | GRMZM2G151407 | GRMZM2G151407_P02 | WRKY |
| ZmWRKY82.1 | GRMZM2G398506 | GRMZM2G398506_P01 | WRKY |
| ZmWRKY82.2 | GRMZM2G398506 | GRMZM2G398506_P02 | WRKY |
| ZmWRKY83   | GRMZM2G381378 | GRMZM2G381378_P01 | WRKY |
| ZmWRKY84   | GRMZM2G006497 | GRMZM2G006497_P01 | WRKY |
| ZmWRKY85   | GRMZM2G516301 | GRMZM2G516301_P01 | WRKY |
| ZmWRKY86   | GRMZM2G083350 | GRMZM2G083350_P01 | WRKY |
| ZmWRKY87   | GRMZM2G448605 | GRMZM2G448605_P01 | WRKY |
| ZmWRKY88   | GRMZM2G063880 | GRMZM2G063880_P01 | WRKY |
| ZmWRKY89   | GRMZM2G414315 | GRMZM2G414315_P01 | WRKY |
| ZmWRKY90   | GRMZM2G057116 | GRMZM2G057116_P01 | WRKY |
| ZmWRKY91   | GRMZM2G061408 | GRMZM2G061408_P01 | WRKY |
| ZmWRKY92.1 | GRMZM2G449681 | GRMZM2G449681_P01 | WRKY |
| ZmWRKY92.2 | GRMZM2G449681 | GRMZM2G449681_P02 | WRKY |
| ZmWRKY93   | GRMZM2G034421 | GRMZM2G034421_P01 | WRKY |
| ZmWRKY94   | GRMZM2G432583 | GRMZM2G432583_P01 | WRKY |
| ZmWRKY95   | GRMZM2G015433 | GRMZM2G015433_P01 | WRKY |
| ZmWRKY96   | GRMZM2G137802 | GRMZM2G137802_P01 | WRKY |
| ZmWRKY97   | GRMZM2G304573 | GRMZM2G304573_P01 | WRKY |
| ZmWRKY98   | GRMZM2G149683 | GRMZM2G149683_P01 | WRKY |
| ZmWRKY99   | GRMZM2G145554 | GRMZM2G145554_P01 | WRKY |
| ZmWRKY100  | GRMZM2G411766 | GRMZM2G411766_P01 | WRKY |
| ZmWRKY101  | GRMZM5G812272 | GRMZM5G812272_P02 | WRKY |
| ZmWRKY102  | GRMZM2G045560 | GRMZM2G045560_P01 | WRKY |

---

---

|             |                  |                   |      |
|-------------|------------------|-------------------|------|
| ZmWRKY103   | GRMZM2G036703    | GRMZM2G036703_P01 | WRKY |
| ZmWRKY104   | GRMZM2G029282    | GRMZM2G029282_P01 | WRKY |
| ZmWRKY105   | GRMZM2G029292    | GRMZM2G029292_P03 | WRKY |
| ZmWRKY106   | GRMZM2G013391    | GRMZM2G013391_P01 | WRKY |
| ZmWRKY107   | GRMZM2G111354    | GRMZM2G111354_P01 | WRKY |
| ZmWRKY108   | GRMZM2G003551    | GRMZM2G003551_P01 | WRKY |
| ZmWRKY109   | GRMZM2G111711    | GRMZM2G111711_P01 | WRKY |
| ZmWRKY110.1 | GRMZM2G171428    | GRMZM2G171428_P01 | WRKY |
| ZmWRKY110.2 | GRMZM2G171428    | GRMZM2G171428_P02 | WRKY |
| ZmWRKY111   | GRMZM2G060918    | GRMZM2G060918_P01 | WRKY |
| ZmWRKY112   | GRMZM2G005207    | GRMZM2G005207_P01 | WRKY |
| ZmWRKY113   | GRMZM2G441031    | GRMZM2G441031_P01 | WRKY |
| ZmWRKY114   | GRMZM2G090594    | GRMZM2G090594_P01 | WRKY |
| ZmWRKY115   | GRMZM2G004060    | GRMZM2G004060_P01 | WRKY |
| ZmWRKY116.1 | GRMZM2G020254    | GRMZM2G020254_P01 | WRKY |
| ZmWRKY116.2 | GRMZM2G020254    | GRMZM2G020254_P02 | WRKY |
| ZmWRKY116.3 | GRMZM2G020254    | GRMZM2G020254_P03 | WRKY |
| ZmWRKY117   | GRMZM2G031963    | GRMZM2G031963_P01 | WRKY |
| ZmWRKY118   | AC208110.2_FG001 | AC208110.2_FGP001 | WRKY |
| ZmbZIP1     | GRMZM2G428184    | GRMZM2G428184_P01 | bZIP |
| ZmbZIP2     | GRMZM2G157177    | GRMZM2G157177_P01 | bZIP |
| ZmbZIP3     | GRMZM2G038015    | GRMZM2G038015_P01 | bZIP |
| ZmbZIP4     | GRMZM2G174284    | GRMZM2G174284_P01 | bZIP |
| ZmbZIP5     | GRMZM2G062391    | GRMZM2G062391_P01 | bZIP |
| ZmbZIP6     | GRMZM2G353553    | GRMZM2G353553_P01 | bZIP |
| ZmbZIP7     | GRMZM2G093020    | GRMZM2G093020_P02 | bZIP |
| ZmbZIP8     | GRMZM2G479885    | GRMZM2G479885_P01 | bZIP |
| ZmbZIP9.1   | GRMZM2G073427    | GRMZM2G073427_P04 | bZIP |
| ZmbZIP9.2   | GRMZM2G073427    | GRMZM2G073427_P02 | bZIP |
| ZmbZIP9.3   | GRMZM2G073427    | GRMZM2G073427_P03 | bZIP |
| ZmbZIP9.4   | GRMZM2G073427    | GRMZM2G073427_P07 | bZIP |
| ZmbZIP10    | GRMZM2G370026    | GRMZM2G370026_P01 | bZIP |
| ZmbZIP11    | AC186606.4_FG003 | AC186606.4_FGP003 | bZIP |
| ZmbZIP12    | GRMZM2G332294    | GRMZM2G332294_P01 | bZIP |
| ZmbZIP13    | GRMZM2G175280    | GRMZM2G175280_P01 | bZIP |
| ZmbZIP14    | GRMZM2G478417    | GRMZM2G478417_P01 | bZIP |
| ZmbZIP15    | GRMZM2G177046    | GRMZM2G177046_P01 | bZIP |
| ZmbZIP16.1  | GRMZM2G019446    | GRMZM2G019446_P02 | bZIP |
| ZmbZIP16.2  | GRMZM2G019446    | GRMZM2G019446_P01 | bZIP |
| ZmbZIP17    | GRMZM2G016150    | GRMZM2G016150_P01 | bZIP |
| ZmbZIP18.1  | GRMZM2G131961    | GRMZM2G131961_P01 | bZIP |
| ZmbZIP18.2  | GRMZM2G131961    | GRMZM2G131961_P03 | bZIP |
| ZmbZIP18.3  | GRMZM2G131961    | GRMZM2G131961_P05 | bZIP |

---

---

|            |                  |                   |      |
|------------|------------------|-------------------|------|
| ZmbZIP19.1 | GRMZM2G112483    | GRMZM2G112483_P01 | bZIP |
| ZmbZIP19.2 | GRMZM2G112483    | GRMZM2G112483_P02 | bZIP |
| ZmbZIP20.1 | GRMZM5G821024    | GRMZM5G821024_P01 | bZIP |
| ZmbZIP20.2 | GRMZM5G821024    | GRMZM5G821024_P02 | bZIP |
| ZmbZIP21.1 | GRMZM2G171370    | GRMZM2G171370_P03 | bZIP |
| ZmbZIP21.2 | GRMZM2G171370    | GRMZM2G171370_P01 | bZIP |
| ZmbZIP22   | AC203957.3_FG004 | AC203957.3_FGP004 | bZIP |
| ZmbZIP23   | GRMZM2G002075    | GRMZM2G002075_P01 | bZIP |
| ZmbZIP24   | GRMZM2G137532    | GRMZM2G137532_P01 | bZIP |
| ZmbZIP25   | GRMZM2G125934    | GRMZM2G125934_P01 | bZIP |
| ZmbZIP26   | GRMZM2G180847    | GRMZM2G180847_P01 | bZIP |
| ZmbZIP27   | GRMZM2G037910    | GRMZM2G037910_P01 | bZIP |
| ZmbZIP28   | GRMZM2G060109    | GRMZM2G060109_P01 | bZIP |
| ZmbZIP29   | GRMZM2G166566    | GRMZM2G166566_P01 | bZIP |
| ZmbZIP30   | AC233853.1_FG002 | AC233853.1_FGP002 | bZIP |
| ZmbZIP31   | GRMZM2G039828    | GRMZM2G039828_P01 | bZIP |
| ZmbZIP32   | GRMZM2G160136    | GRMZM2G160136_P02 | bZIP |
| ZmbZIP33   | GRMZM2G074373    | GRMZM2G074373_P01 | bZIP |
| ZmbZIP34   | GRMZM2G160902    | GRMZM2G160902_P01 | bZIP |
| ZmbZIP35   | GRMZM2G024851    | GRMZM2G024851_P01 | bZIP |
| ZmbZIP36.1 | GRMZM2G146020    | GRMZM2G146020_P01 | bZIP |
| ZmbZIP36.2 | GRMZM2G146020    | GRMZM2G146020_P02 | bZIP |
| ZmbZIP37.1 | GRMZM5G858197    | GRMZM5G858197_P02 | bZIP |
| ZmbZIP37.2 | GRMZM5G858197    | GRMZM5G858197_P03 | bZIP |
| ZmbZIP38.1 | GRMZM2G060216    | GRMZM2G060216_P01 | bZIP |
| ZmbZIP38.2 | GRMZM2G060216    | GRMZM2G060216_P02 | bZIP |
| ZmbZIP39   | GRMZM2G159134    | GRMZM2G159134_P02 | bZIP |
| ZmbZIP40.1 | GRMZM2G019907    | GRMZM2G019907_P02 | bZIP |
| ZmbZIP40.2 | GRMZM2G019907    | GRMZM2G019907_P03 | bZIP |
| ZmbZIP41   | GRMZM2G027976    | GRMZM2G027976_P01 | bZIP |
| ZmbZIP42   | GRMZM5G848942    | GRMZM5G848942_P01 | bZIP |
| ZmbZIP43   | GRMZM2G117851    | GRMZM2G117851_P01 | bZIP |
| ZmbZIP44   | GRMZM2G368491    | GRMZM2G368491_P01 | bZIP |
| ZmbZIP45   | GRMZM2G120167    | GRMZM2G120167_P01 | bZIP |
| ZmbZIP46.1 | GRMZM2G157722    | GRMZM2G157722_P02 | bZIP |
| ZmbZIP46.2 | GRMZM2G157722    | GRMZM2G157722_P01 | bZIP |
| ZmbZIP47   | GRMZM2G118870    | GRMZM2G118870_P01 | bZIP |
| ZmbZIP48   | GRMZM2G380897    | GRMZM2G380897_P01 | bZIP |
| ZmbZIP49   | GRMZM2G122846    | GRMZM2G122846_P01 | bZIP |
| ZmbZIP50   | GRMZM2G030877    | GRMZM2G030877_P01 | bZIP |
| ZmbZIP51   | GRMZM2G011119    | GRMZM2G011119_P01 | bZIP |
| ZmbZIP52   | AC190609.3_FG001 | AC190609.3_FGP001 | bZIP |
| ZmbZIP53   | GRMZM2G149150    | GRMZM2G149150_P01 | bZIP |

---



---

|            |               |                   |      |
|------------|---------------|-------------------|------|
| ZmbZIP54   | GRMZM2G144480 | GRMZM2G144480_P01 | bZIP |
| ZmbZIP55   | GRMZM2G079365 | GRMZM2G079365_P01 | bZIP |
| ZmbZIP56   | GRMZM2G052102 | GRMZM2G052102_P01 | bZIP |
| ZmbZIP57   | GRMZM2G336766 | GRMZM2G336766_P01 | bZIP |
| ZmbZIP58   | GRMZM2G019106 | GRMZM2G019106_P01 | bZIP |
| ZmbZIP59   | GRMZM2G361611 | GRMZM2G361611_P01 | bZIP |
| ZmbZIP60.1 | GRMZM2G007063 | GRMZM2G007063_P01 | bZIP |
| ZmbZIP60.2 | GRMZM2G007063 | GRMZM2G007063_P04 | bZIP |
| ZmbZIP61   | GRMZM2G386273 | GRMZM2G386273_P01 | bZIP |
| ZmbZIP62.1 | GRMZM2G000171 | GRMZM2G000171_P02 | bZIP |
| ZmbZIP62.2 | GRMZM2G000171 | GRMZM2G000171_P01 | bZIP |
| ZmbZIP63   | GRMZM2G153144 | GRMZM2G153144_P01 | bZIP |
| ZmbZIP64   | GRMZM2G444748 | GRMZM2G444748_P01 | bZIP |
| ZmbZIP65.1 | GRMZM2G098904 | GRMZM2G098904_P01 | bZIP |
| ZmbZIP65.2 | GRMZM2G098904 | GRMZM2G098904_P02 | bZIP |
| ZmbZIP66   | GRMZM2G080111 | GRMZM2G080111_P01 | bZIP |
| ZmbZIP67   | GRMZM2G137046 | GRMZM2G137046_P01 | bZIP |
| ZmbZIP68   | GRMZM2G029979 | GRMZM2G029979_P01 | bZIP |
| ZmbZIP69   | GRMZM2G158313 | GRMZM2G158313_P01 | bZIP |
| ZmbZIP70   | GRMZM2G092609 | GRMZM2G092609_P01 | bZIP |
| ZmbZIP71   | GRMZM2G111504 | GRMZM2G111504_P01 | bZIP |
| ZmbZIP72   | GRMZM2G020799 | GRMZM2G020799_P01 | bZIP |
| ZmbZIP73   | GRMZM2G073892 | GRMZM2G073892_P01 | bZIP |
| ZmbZIP74   | GRMZM2G448607 | GRMZM2G448607_P01 | bZIP |
| ZmbZIP75   | GRMZM2G402862 | GRMZM2G402862_P01 | bZIP |
| ZmbZIP76   | GRMZM2G055413 | GRMZM2G055413_P01 | bZIP |
| ZmbZIP77.1 | GRMZM2G133331 | GRMZM2G133331_P01 | bZIP |
| ZmbZIP77.2 | GRMZM2G133331 | GRMZM2G133331_P02 | bZIP |
| ZmbZIP77.3 | GRMZM2G133331 | GRMZM2G133331_P03 | bZIP |
| ZmbZIP78   | GRMZM2G396632 | GRMZM2G396632_P01 | bZIP |
| ZmbZIP79.1 | GRMZM2G045236 | GRMZM2G045236_P01 | bZIP |
| ZmbZIP79.2 | GRMZM2G045236 | GRMZM2G045236_P02 | bZIP |
| ZmbZIP80.1 | GRMZM2G000842 | GRMZM2G000842_P01 | bZIP |
| ZmbZIP80.2 | GRMZM2G000842 | GRMZM2G000842_P02 | bZIP |
| ZmbZIP80.3 | GRMZM2G000842 | GRMZM2G000842_P03 | bZIP |
| ZmbZIP81.1 | GRMZM2G129247 | GRMZM2G129247_P02 | bZIP |
| ZmbZIP81.2 | GRMZM2G129247 | GRMZM2G129247_P03 | bZIP |
| ZmbZIP82   | GRMZM2G175870 | GRMZM2G175870_P01 | bZIP |
| ZmbZIP83.1 | GRMZM2G011932 | GRMZM2G011932_P01 | bZIP |
| ZmbZIP83.2 | GRMZM2G011932 | GRMZM2G011932_P04 | bZIP |
| ZmbZIP84   | GRMZM2G438652 | GRMZM2G438652_P01 | bZIP |
| ZmbZIP85.1 | GRMZM2G015534 | GRMZM2G015534_P02 | bZIP |
| ZmbZIP85.2 | GRMZM2G015534 | GRMZM2G015534_P01 | bZIP |

---

---

|             |                  |                   |      |
|-------------|------------------|-------------------|------|
| ZmbZIP85.3  | GRMZM2G015534    | GRMZM2G015534_P03 | bZIP |
| ZmbZIP86.1  | GRMZM2G095078    | GRMZM2G095078_P01 | bZIP |
| ZmbZIP86.2  | GRMZM2G095078    | GRMZM2G095078_P02 | bZIP |
| ZmbZIP87    | GRMZM2G092137    | GRMZM2G092137_P01 | bZIP |
| ZmbZIP88    | GRMZM2G358796    | GRMZM2G358796_P01 | bZIP |
| ZmbZIP89.1  | GRMZM2G006578    | GRMZM2G006578_P01 | bZIP |
| ZmbZIP89.2  | GRMZM2G006578    | GRMZM2G006578_P02 | bZIP |
| ZmbZIP89.3  | GRMZM2G006578    | GRMZM2G006578_P03 | bZIP |
| ZmbZIP90    | AC200057.4_FG007 | AC200057.4_FGP007 | bZIP |
| ZmbZIP91    | GRMZM2G043600    | GRMZM2G043600_P01 | bZIP |
| ZmbZIP92    | GRMZM2G149040    | GRMZM2G149040_P01 | bZIP |
| ZmbZIP93.1  | GRMZM2G361847    | GRMZM2G361847_P04 | bZIP |
| ZmbZIP93.2  | GRMZM2G361847    | GRMZM2G361847_P01 | bZIP |
| ZmbZIP93.3  | GRMZM2G361847    | GRMZM2G361847_P02 | bZIP |
| ZmbZIP93.4  | GRMZM2G361847    | GRMZM2G361847_P07 | bZIP |
| ZmbZIP94    | GRMZM2G077124    | GRMZM2G077124_P03 | bZIP |
| ZmbZIP95    | GRMZM2G067921    | GRMZM2G067921_P01 | bZIP |
| ZmbZIP96.1  | GRMZM2G030280    | GRMZM2G030280_P01 | bZIP |
| ZmbZIP96.2  | GRMZM2G030280    | GRMZM2G030280_P02 | bZIP |
| ZmbZIP97.1  | GRMZM2G171912    | GRMZM2G171912_P01 | bZIP |
| ZmbZIP97.2  | GRMZM2G171912    | GRMZM2G171912_P02 | bZIP |
| ZmbZIP98    | GRMZM2G132868    | GRMZM2G132868_P01 | bZIP |
| ZmbZIP99    | GRMZM2G161009    | GRMZM2G161009_P01 | bZIP |
| ZmbZIP100.1 | GRMZM2G080731    | GRMZM2G080731_P01 | bZIP |
| ZmbZIP100.2 | GRMZM2G080731    | GRMZM2G080731_P02 | bZIP |
| ZmbZIP100.3 | GRMZM2G080731    | GRMZM2G080731_P03 | bZIP |
| ZmbZIP101.1 | GRMZM2G033230    | GRMZM2G033230_P01 | bZIP |
| ZmbZIP101.2 | GRMZM2G033230    | GRMZM2G033230_P02 | bZIP |
| ZmbZIP102   | GRMZM2G438293    | GRMZM2G438293_P01 | bZIP |
| ZmbZIP103   | AC232238.2_FG004 | AC232238.2_FGP004 | bZIP |
| ZmbZIP104   | GRMZM2G168079    | GRMZM2G168079_P01 | bZIP |
| ZmbZIP105   | GRMZM2G125243    | GRMZM2G125243_P01 | bZIP |
| ZmbZIP106.1 | GRMZM2G170079    | GRMZM2G170079_P02 | bZIP |
| ZmbZIP106.2 | GRMZM2G170079    | GRMZM2G170079_P01 | bZIP |
| ZmbZIP107   | GRMZM2G033413    | GRMZM2G033413_P01 | bZIP |
| ZmbZIP108   | GRMZM2G140355    | GRMZM2G140355_P01 | bZIP |
| ZmbZIP109   | GRMZM2G407631    | GRMZM2G407631_P01 | bZIP |
| ZmbZIP110.1 | GRMZM2G025812    | GRMZM2G025812_P01 | bZIP |
| ZmbZIP110.2 | GRMZM2G025812    | GRMZM2G025812_P02 | bZIP |
| ZmbZIP111   | GRMZM2G060290    | GRMZM2G060290_P01 | bZIP |
| ZmbZIP112.1 | GRMZM2G103647    | GRMZM2G103647_P03 | bZIP |
| ZmbZIP112.2 | GRMZM2G103647    | GRMZM2G103647_P01 | bZIP |
| ZmbZIP113   | GRMZM2G151295    | GRMZM2G151295_P02 | bZIP |

---

---

|             |                  |                   |      |
|-------------|------------------|-------------------|------|
| ZmbZIP114.1 | GRMZM2G056099    | GRMZM2G056099_P01 | bZIP |
| ZmbZIP114.2 | GRMZM2G056099    | GRMZM2G056099_P02 | bZIP |
| ZmbZIP115   | GRMZM2G066734    | GRMZM2G066734_P01 | bZIP |
| ZmbZIP116   | GRMZM2G473274    | GRMZM2G473274_P01 | bZIP |
| ZmbZIP117   | GRMZM2G366264    | GRMZM2G366264_P01 | bZIP |
| ZmbZIP118   | GRMZM2G365754    | GRMZM2G365754_P01 | bZIP |
| ZmbZIP119.1 | GRMZM2G136266    | GRMZM2G136266_P01 | bZIP |
| ZmbZIP119.2 | GRMZM2G136266    | GRMZM2G136266_P02 | bZIP |
| ZmbZIP120   | GRMZM2G088140    | GRMZM2G088140_P02 | bZIP |
| ZmbZIP121   | GRMZM2G094352    | GRMZM2G094352_P01 | bZIP |
| ZmbZIP122   | GRMZM5G884349    | GRMZM5G884349_P01 | bZIP |
| ZmbZIP123.1 | GRMZM2G425920    | GRMZM2G425920_P01 | bZIP |
| ZmbZIP123.2 | GRMZM2G425920    | GRMZM2G425920_P02 | bZIP |
| ZmbZIP124   | GRMZM2G358701    | GRMZM2G358701_P01 | bZIP |
| ZmbZIP125.1 | GRMZM2G445575    | GRMZM2G445575_P01 | bZIP |
| ZmbZIP125.2 | GRMZM2G445575    | GRMZM2G445575_P02 | bZIP |
| ZmbZIP125.3 | GRMZM2G445575    | GRMZM2G445575_P03 | bZIP |
| ZmMYB001    | AC217264.3_FG005 | AC217264.3_FGP005 | MYB  |
| ZmMYB002    | GRMZM2G024468    | GRMZM2G024468_P01 | MYB  |
| ZmMYB003    | GRMZM2G037650    | GRMZM2G037650_P01 | MYB  |
| ZmMYB004    | GRMZM2G046443    | GRMZM2G046443_P01 | MYB  |
| ZmMYB005    | GRMZM2G054111    | GRMZM2G054111_P01 | MYB  |
| ZmMYB006    | GRMZM2G057027    | GRMZM2G057027_P02 | MYB  |
| ZmMYB007    | GRMZM2G070849    | GRMZM2G070849_P01 | MYB  |
| ZmMYB008    | GRMZM2G077147    | GRMZM2G077147_P01 | MYB  |
| ZmMYB009    | GRMZM2G079123    | GRMZM2G079123_P01 | MYB  |
| ZmMYB010    | GRMZM2G084583    | GRMZM2G084583_P01 | MYB  |
| ZmMYB011    | GRMZM2G084799    | GRMZM2G084799_P01 | MYB  |
| ZmMYB012    | GRMZM2G106558    | GRMZM2G106558_P02 | MYB  |
| ZmMYB013    | GRMZM2G110135    | GRMZM2G110135_P01 | MYB  |
| ZmMYB014    | GRMZM2G121570    | GRMZM2G121570_P01 | MYB  |
| ZmMYB015    | GRMZM2G130149    | GRMZM2G130149_P01 | MYB  |
| ZmMYB016    | GRMZM2G131937    | GRMZM2G131937_P01 | MYB  |
| ZmMYB017    | GRMZM2G143046    | GRMZM2G143046_P01 | MYB  |
| ZmMYB018    | GRMZM2G147346    | GRMZM2G147346_P01 | MYB  |
| ZmMYB019    | GRMZM2G147698    | GRMZM2G147698_P01 | MYB  |
| ZmMYB020    | GRMZM2G308034    | GRMZM2G308034_P01 | MYB  |
| ZmMYB021    | GRMZM2G403620    | GRMZM2G403620_P01 | MYB  |
| ZmMYB022    | GRMZM2G428555    | GRMZM2G428555_P01 | MYB  |
| ZmMYB023    | GRMZM5G870592    | GRMZM5G870592_P01 | MYB  |
| ZmMYB024    | AC165178.2_FG004 | AC165178.2_FGP004 | MYB  |
| ZmMYB025    | GRMZM2G032655    | GRMZM2G032655_P01 | MYB  |
| ZmMYB026    | GRMZM2G038722    | GRMZM2G038722_P01 | MYB  |

---

---

|          |               |                   |     |
|----------|---------------|-------------------|-----|
| ZmMYB027 | GRMZM2G048295 | GRMZM2G048295_P01 | MYB |
| ZmMYB028 | GRMZM2G050305 | GRMZM2G050305_P01 | MYB |
| ZmMYB029 | GRMZM2G064630 | GRMZM2G064630_P01 | MYB |
| ZmMYB030 | GRMZM2G087955 | GRMZM2G087955_P01 | MYB |
| ZmMYB031 | GRMZM2G090837 | GRMZM2G090837_P01 | MYB |
| ZmMYB032 | GRMZM2G105137 | GRMZM2G105137_P01 | MYB |
| ZmMYB033 | GRMZM2G115859 | GRMZM2G115859_P01 | MYB |
| ZmMYB034 | GRMZM2G123202 | GRMZM2G123202_P01 | MYB |
| ZmMYB035 | GRMZM2G124715 | GRMZM2G124715_P01 | MYB |
| ZmMYB036 | GRMZM2G139284 | GRMZM2G139284_P01 | MYB |
| ZmMYB037 | GRMZM2G166337 | GRMZM2G166337_P01 | MYB |
| ZmMYB038 | GRMZM2G176327 | GRMZM2G176327_P01 | MYB |
| ZmMYB039 | GRMZM2G001875 | GRMZM2G001875_P01 | MYB |
| ZmMYB040 | GRMZM2G017520 | GRMZM2G017520_P01 | MYB |
| ZmMYB041 | GRMZM2G041415 | GRMZM2G041415_P01 | MYB |
| ZmMYB042 | GRMZM2G047626 | GRMZM2G047626_P01 | MYB |
| ZmMYB043 | GRMZM2G051256 | GRMZM2G051256_P01 | MYB |
| ZmMYB044 | GRMZM2G052377 | GRMZM2G052377_P01 | MYB |
| ZmMYB045 | GRMZM2G064744 | GRMZM2G064744_P01 | MYB |
| ZmMYB046 | GRMZM2G083239 | GRMZM2G083239_P01 | MYB |
| ZmMYB047 | GRMZM2G088783 | GRMZM2G088783_P01 | MYB |
| ZmMYB048 | GRMZM2G111731 | GRMZM2G111731_P01 | MYB |
| ZmMYB049 | GRMZM2G139688 | GRMZM2G139688_P01 | MYB |
| ZmMYB050 | GRMZM2G143328 | GRMZM2G143328_P01 | MYB |
| ZmMYB051 | GRMZM2G158700 | GRMZM2G158700_P01 | MYB |
| ZmMYB052 | GRMZM2G160838 | GRMZM2G160838_P01 | MYB |
| ZmMYB053 | GRMZM2G160840 | GRMZM2G160840_P01 | MYB |
| ZmMYB054 | GRMZM2G162709 | GRMZM2G162709_P01 | MYB |
| ZmMYB055 | GRMZM2G167829 | GRMZM2G167829_P01 | MYB |
| ZmMYB056 | GRMZM2G369799 | GRMZM2G369799_P01 | MYB |
| ZmMYB057 | GRMZM2G460869 | GRMZM2G460869_P01 | MYB |
| ZmMYB058 | GRMZM2G470307 | GRMZM2G470307_P01 | MYB |
| ZmMYB059 | GRMZM5G803355 | GRMZM5G803355_P01 | MYB |
| ZmMYB060 | GRMZM2G011422 | GRMZM2G011422_P01 | MYB |
| ZmMYB061 | GRMZM2G015021 | GRMZM2G015021_P01 | MYB |
| ZmMYB062 | GRMZM2G017268 | GRMZM2G017268_P01 | MYB |
| ZmMYB063 | GRMZM2G043792 | GRMZM2G043792_P01 | MYB |
| ZmMYB064 | GRMZM2G055158 | GRMZM2G055158_P01 | MYB |
| ZmMYB065 | GRMZM2G089244 | GRMZM2G089244_P01 | MYB |
| ZmMYB066 | GRMZM2G108959 | GRMZM2G108959_P01 | MYB |
| ZmMYB067 | GRMZM2G111045 | GRMZM2G111045_P01 | MYB |
| ZmMYB068 | GRMZM2G111117 | GRMZM2G111117_P01 | MYB |
| ZmMYB069 | GRMZM2G127857 | GRMZM2G127857_P01 | MYB |

---

---

|          |                  |                   |     |
|----------|------------------|-------------------|-----|
| ZmMYB070 | GRMZM2G131442    | GRMZM2G131442_P01 | MYB |
| ZmMYB071 | GRMZM2G138427    | GRMZM2G138427_P01 | MYB |
| ZmMYB072 | GRMZM2G162434    | GRMZM2G162434_P01 | MYB |
| ZmMYB073 | GRMZM2G419239    | GRMZM2G419239_P01 | MYB |
| ZmMYB074 | GRMZM2G496770    | GRMZM2G496770_P01 | MYB |
| ZmMYB075 | GRMZM5G833253    | GRMZM5G833253_P01 | MYB |
| ZmMYB076 | GRMZM2G048136    | GRMZM2G048136_P01 | MYB |
| ZmMYB077 | GRMZM2G001223    | GRMZM2G001223_P03 | MYB |
| ZmMYB078 | GRMZM2G027697    | GRMZM2G027697_P01 | MYB |
| ZmMYB079 | GRMZM2G040924    | GRMZM2G040924_P01 | MYB |
| ZmMYB080 | GRMZM2G070523    | GRMZM2G070523_P01 | MYB |
| ZmMYB081 | GRMZM2G073836    | GRMZM2G073836_P01 | MYB |
| ZmMYB082 | GRMZM2G088189    | GRMZM2G088189_P01 | MYB |
| ZmMYB083 | GRMZM2G095904    | GRMZM2G095904_P01 | MYB |
| ZmMYB084 | GRMZM2G104789    | GRMZM2G104789_P01 | MYB |
| ZmMYB085 | GRMZM2G145444    | GRMZM2G145444_P01 | MYB |
| ZmMYB086 | GRMZM2G159547    | GRMZM2G159547_P01 | MYB |
| ZmMYB087 | GRMZM2G161512    | GRMZM2G161512_P01 | MYB |
| ZmMYB088 | GRMZM2G170049    | GRMZM2G170049_P01 | MYB |
| ZmMYB089 | GRMZM2G302549    | GRMZM2G302549_P01 | MYB |
| ZmMYB090 | GRMZM2G455869    | GRMZM2G455869_P01 | MYB |
| ZmMYB091 | GRMZM2G013581    | GRMZM2G013581_P01 | MYB |
| ZmMYB092 | GRMZM2G048910    | GRMZM2G048910_P01 | MYB |
| ZmMYB093 | GRMZM2G069325    | GRMZM2G069325_P02 | MYB |
| ZmMYB094 | GRMZM2G077789    | GRMZM2G077789_P01 | MYB |
| ZmMYB095 | GRMZM2G078820    | GRMZM2G078820_P01 | MYB |
| ZmMYB096 | GRMZM2G093647    | GRMZM2G093647_P01 | MYB |
| ZmMYB097 | GRMZM2G093660    | GRMZM2G093660_P01 | MYB |
| ZmMYB098 | GRMZM2G093789    | GRMZM2G093789_P01 | MYB |
| ZmMYB099 | GRMZM2G102790    | GRMZM2G102790_P01 | MYB |
| ZmMYB100 | GRMZM2G175232    | GRMZM2G175232_P01 | MYB |
| ZmMYB101 | GRMZM2G305856    | GRMZM2G305856_P01 | MYB |
| ZmMYB102 | GRMZM2G343068    | GRMZM2G343068_P01 | MYB |
| ZmMYB103 | GRMZM2G423833    | GRMZM2G423833_P01 | MYB |
| ZmMYB104 | GRMZM2G701063    | GRMZM2G701063_P01 | MYB |
| ZmMYB105 | AC213884.3_FG002 | AC213884.3_FGP002 | MYB |
| ZmMYB106 | GRMZM2G000818    | GRMZM2G000818_P01 | MYB |
| ZmMYB107 | GRMZM2G031323    | GRMZM2G031323_P01 | MYB |
| ZmMYB108 | GRMZM2G045748    | GRMZM2G045748_P01 | MYB |
| ZmMYB109 | GRMZM2G050550    | GRMZM2G050550_P01 | MYB |
| ZmMYB110 | GRMZM2G056407    | GRMZM2G056407_P01 | MYB |
| ZmMYB111 | GRMZM2G104551    | GRMZM2G104551_P01 | MYB |
| ZmMYB112 | GRMZM2G117244    | GRMZM2G117244_P01 | MYB |

---

---

|          |                  |                   |     |
|----------|------------------|-------------------|-----|
| ZmMYB113 | GRMZM2G126566    | GRMZM2G126566_P01 | MYB |
| ZmMYB114 | GRMZM2G150841    | GRMZM2G150841_P01 | MYB |
| ZmMYB115 | GRMZM2G169356    | GRMZM2G169356_P01 | MYB |
| ZmMYB116 | GRMZM2G172327    | GRMZM2G172327_P01 | MYB |
| ZmMYB117 | GRMZM2G003406    | GRMZM2G003406_P01 | MYB |
| ZmMYB118 | GRMZM2G006352    | GRMZM2G006352_P01 | MYB |
| ZmMYB119 | GRMZM2G028054    | GRMZM2G028054_P01 | MYB |
| ZmMYB120 | GRMZM2G047600    | GRMZM2G047600_P01 | MYB |
| ZmMYB121 | GRMZM2G051528    | GRMZM2G051528_P01 | MYB |
| ZmMYB122 | GRMZM2G096358    | GRMZM2G096358_P01 | MYB |
| ZmMYB123 | GRMZM2G119693    | GRMZM2G119693_P01 | MYB |
| ZmMYB124 | GRMZM2G151205    | GRMZM2G151205_P01 | MYB |
| ZmMYB125 | GRMZM2G169316    | GRMZM2G169316_P01 | MYB |
| ZmMYB126 | GRMZM2G171781    | GRMZM2G171781_P01 | MYB |
| ZmMYB127 | GRMZM2G312419    | GRMZM2G312419_P01 | MYB |
| ZmMYB128 | GRMZM2G322490    | GRMZM2G322490_P01 | MYB |
| ZmMYB129 | GRMZM2G330475    | GRMZM2G330475_P01 | MYB |
| ZmMYB130 | GRMZM2G395672    | GRMZM2G395672_P01 | MYB |
| ZmMYB131 | GRMZM2G405094    | GRMZM2G405094_P01 | MYB |
| ZmMYB132 | GRMZM2G431156    | GRMZM2G431156_P01 | MYB |
| ZmMYB133 | GRMZM2G004090    | GRMZM2G004090_P01 | MYB |
| ZmMYB134 | GRMZM2G005066    | GRMZM2G005066_P01 | MYB |
| ZmMYB135 | GRMZM2G022686    | GRMZM2G022686_P01 | MYB |
| ZmMYB136 | GRMZM2G044824    | GRMZM2G044824_P01 | MYB |
| ZmMYB137 | GRMZM2G089686    | GRMZM2G089686_P01 | MYB |
| ZmMYB138 | GRMZM2G098179    | GRMZM2G098179_P01 | MYB |
| ZmMYB139 | GRMZM2G134279    | GRMZM2G134279_P01 | MYB |
| ZmMYB140 | GRMZM2G167088    | GRMZM2G167088_P01 | MYB |
| ZmMYB141 | GRMZM2G416652    | GRMZM2G416652_P01 | MYB |
| ZmMYB142 | GRMZM5G803308    | GRMZM5G803308_P01 | MYB |
| ZmMYB143 | AC197146.3_FG002 | AC197146.3_FGP002 | MYB |
| ZmMYB144 | AC206901.3_FG005 | AC206901.3_FGP005 | MYB |
| ZmMYB145 | GRMZM2G001824    | GRMZM2G001824_P01 | MYB |
| ZmMYB146 | GRMZM2G052606    | GRMZM2G052606_P01 | MYB |
| ZmMYB147 | GRMZM2G081557    | GRMZM2G081557_P01 | MYB |
| ZmMYB148 | GRMZM2G097636    | GRMZM2G097636_P01 | MYB |
| ZmMYB149 | GRMZM2G097638    | GRMZM2G097638_P01 | MYB |
| ZmMYB150 | GRMZM2G127490    | GRMZM2G127490_P01 | MYB |
| ZmMYB151 | GRMZM2G150680    | GRMZM2G150680_P01 | MYB |
| ZmMYB152 | GRMZM2G172487    | GRMZM2G172487_P01 | MYB |
| ZmMYB153 | GRMZM2G172575    | GRMZM2G172575_P01 | MYB |
| ZmMYB154 | GRMZM2G173633    | GRMZM2G173633_P01 | MYB |
| ZmMYB155 | GRMZM2G311059    | GRMZM2G311059_P01 | MYB |

---

---

|          |                  |                   |     |
|----------|------------------|-------------------|-----|
| ZmMYB156 | GRMZM2G325907    | GRMZM2G325907_P01 | MYB |
| ZmMYB157 | GRMZM2G425427    | GRMZM2G425427_P01 | MYB |
| ZmMYC1   | GRMZM2G057413    | GRMZM2G057413_P01 | MYC |
| ZmMYC2   | AC193786.3_FG005 | AC193786.3_FGP005 | MYC |
| ZmMYC3   | GRMZM2G089501    | GRMZM2G089501_P01 | MYC |
| ZmMYC4   | GRMZM2G009478    | GRMZM2G009478_P05 | MYC |
| ZmMYC5   | GRMZM2G317450    | GRMZM2G317450_P03 | MYC |
| ZmMYC6   | GRMZM2G114444    | GRMZM2G114444_P02 | MYC |
| ZmMYC7   | GRMZM2G001930    | GRMZM2G001930_P01 | MYC |
| ZmMYC8   | GRMZM2G049229    | GRMZM2G049229_P01 | MYC |

---
