# Supplementary material for: Maize protein phosphatase gene family: identification and molecular characterization
Source: PubMed Central journal article supplement (PMC4169795; doi:10.1186/1471-2164-15-773), 2014-09-09
Supplement: 12864_2014_6458_MOESM21_ESM.pdf [file 12864_2014_6458_MOESM21_ESM.pdf]

**Table S11.** List of expression values of ZmPP genes under cold stress.

DH7 log(c), DH7 log(k), DL3 log(c), DL3 log(k) means intensity (AU) of fluorescence of labeled aaRNA from cold-treatment (c) or control (k) hybridizing to the probe, shown as log<sub>2</sub> in the respective maize line.

DH7 log(c/k), DL3 log(c/k) means log<sub>2</sub> of ratio of expression in cold-treated vs. control of the probe in the respective maize line, respectively.

Values in red and blue indicate the fold increase and decrease in expression in the drought-stressed tissue, respectively.

| Name    | DH7 log(c)  | DH7 log(k)  | DL3 log(c)  | DL3 log(k)  | DH7 log(c/k) | DL3 log(c/k) |
|---------|-------------|-------------|-------------|-------------|--------------|--------------|
| ZmPP92  | 12.2755891  | 8.598624721 | 12.21228293 | 8.837911579 | 3.676964381  | 3.374371     |
| ZmPP112 | 11.54955362 | 8.265338552 | 11.1310569  | 8.489927601 | 3.284215069  | 2.641129     |
| ZmPP6   | 10.07984605 | 7.28284839  | 9.424434785 | 7.617382441 | 2.796997663  | 1.807052     |
| ZmPP127 | 12.35940949 | 10.18063729 | 12.21841043 | 10.1860328  | 2.178772196  | 2.032378     |
| ZmPP154 | 9.896163431 | 7.723406847 | 8.610214666 | 7.710736723 | 2.172756584  | 0.899478     |
| ZmPP77  | 6.980064984 | 4.886418438 | 6.725156172 | 5.201198739 | 2.093646546  | 1.523957     |
| ZmPP66  | 10.84811506 | 8.835777353 | 11.23824522 | 8.847655697 | 2.012337709  | 2.39059      |
| ZmPP155 | 9.383089494 | 7.527788394 | 9.409408919 | 8.47421486  | 1.8553011    | 0.935194     |
| ZmPP149 | 10.41260733 | 8.619329697 | 10.41208824 | 8.590938065 | 1.793277635  | 1.82115      |
| ZmPP116 | 11.15854185 | 9.466536325 | 10.61700151 | 9.420995312 | 1.692005524  | 1.196006     |
| ZmPP82  | 13.07127009 | 11.41009969 | 12.93326538 | 11.29560818 | 1.661170398  | 1.637657     |
| ZmPP24  | 11.08830144 | 9.499679419 | 10.80005566 | 9.320061817 | 1.588622017  | 1.479994     |
| ZmPP29  | 11.90575413 | 10.40051102 | 11.93719061 | 10.2565259  | 1.505243108  | 1.680665     |
| ZmPP27  | 13.26748158 | 11.80536894 | 13.38159698 | 11.72946917 | 1.462112638  | 1.652128     |
| ZmPP80  | 12.522802   | 11.11657237 | 11.74050475 | 11.39852087 | 1.40622963   | 0.341984     |
| ZmPP132 | 12.3186864  | 11.07213976 | 12.17359906 | 10.98792645 | 1.246546645  | 1.185673     |
| ZmPP56  | 4.342196656 | 3.104836955 | 3.913025071 | 4.188681318 | 1.237359701  | -0.27566     |
| ZmPP28  | 12.28309221 | 11.0563846  | 11.66313249 | 10.98727403 | 1.226707608  | 0.675858     |
| ZmPP76  | 11.27052205 | 10.0887268  | 11.55889605 | 10.25796511 | 1.181795251  | 1.300931     |
| ZmPP159 | 12.6819751  | 11.52062234 | 12.62682101 | 11.79398156 | 1.161352757  | 0.832839     |
| ZmPP156 | 10.99669878 | 9.936068793 | 10.89779218 | 9.758725256 | 1.060629984  | 1.139067     |
| ZmPP135 | 11.12474438 | 10.14597803 | 11.34371983 | 10.6788961  | 0.978766349  | 0.664824     |
| ZmPP139 | 5.334634983 | 4.362378575 | 4.701168463 | 4.76037798  | 0.972256408  | -0.05921     |
| ZmPP124 | 7.860842031 | 6.89499714  | 8.714069363 | 8.011643134 | 0.965844891  | 0.702426     |
| ZmPP13  | 12.32920953 | 11.3838856  | 12.58838915 | 11.59916572 | 0.945323927  | 0.989223     |
| ZmPP95  | 13.68410911 | 12.76682723 | 13.05638895 | 12.74074138 | 0.91728188   | 0.315648     |
| ZmPP129 | 6.817685094 | 5.930875664 | 6.579063854 | 6.448932054 | 0.88680943   | 0.130132     |
| ZmPP57  | 13.12064011 | 12.30173349 | 12.39563661 | 12.07020646 | 0.818906617  | 0.32543      |
| ZmPP115 | 14.54815253 | 13.78120358 | 14.14932684 | 13.57728373 | 0.76694895   | 0.572043     |
| ZmPP89  | 13.68136519 | 12.9145811  | 13.51241469 | 12.94277237 | 0.766784094  | 0.569642     |
| ZmPP4   | 12.4979262  | 11.75525578 | 12.62497969 | 11.92012166 | 0.742670423  | 0.704858     |
| ZmPP10  | 11.63720875 | 10.9081907  | 12.19914967 | 10.97235589 | 0.729018055  | 1.226794     |
| ZmPP53  | 13.29529187 | 12.56913221 | 13.19052982 | 12.45982944 | 0.726159658  | 0.7307       |
| ZmPP147 | 10.18551135 | 9.478730255 | 11.00175874 | 9.86031133  | 0.706781092  | 1.141447     |
| ZmPP54  | 12.0073442  | 11.34572398 | 12.9665977  | 11.40058413 | 0.661620218  | 1.566014     |
| ZmPP146 | 5.000527939 | 4.349701973 | 4.945741656 | 3.6245451   | 0.650825967  | 1.321197     |
| ZmPP105 | 9.528059634 | 8.894928097 | 9.076896617 | 8.404963984 | 0.633131537  | 0.671933     |
| ZmPP143 | 11.3862509  | 10.80026657 | 11.79229712 | 10.94269874 | 0.585984323  | 0.849598     |
| ZmPP153 | 11.5830344  | 11.02959379 | 11.60089165 | 11.07489182 | 0.553440613  | 0.526        |
| ZmPP144 | 11.23249265 | 10.70410717 | 10.98328808 | 11.10507877 | 0.528385478  | -0.12179     |
| ZmPP9   | 5.733209593 | 5.302130598 | 5.340739588 | 5.612986888 | 0.431078994  | -0.27225     |
| ZmPP145 | 14.85310581 | 14.43844464 | 14.73862919 | 14.63118704 | 0.414661168  | 0.107442     |
| ZmPP98  | 12.49745449 | 12.10996056 | 12.47360192 | 12.24526636 | 0.387493928  | 0.228336     |
| ZmPP128 | 11.95642001 | 11.60804673 | 11.54632935 | 11.59902057 | 0.348373281  | -0.05269     |
| ZmPP44  | 10.45270446 | 10.10558801 | 10.25026393 | 9.916670274 | 0.347116448  | 0.333594     |

|         |             |             |             |             |             |          |
|---------|-------------|-------------|-------------|-------------|-------------|----------|
| ZmPP70  | 9.758673125 | 9.415697332 | 9.778183185 | 9.571448028 | 0.342975793 | 0.206735 |
| ZmPP47  | 11.57857454 | 11.24535466 | 10.9884402  | 11.37116394 | 0.333219878 | -0.38272 |
| ZmPP90  | 10.33833083 | 10.02930996 | 10.57959313 | 10.08923108 | 0.309020866 | 0.490362 |
| ZmPP85  | 12.4304873  | 12.15609027 | 12.22109413 | 12.53444497 | 0.274397038 | -0.31335 |
| ZmPP106 | 11.89520274 | 11.6354045  | 11.89309844 | 11.72286099 | 0.259798232 | 0.170237 |
| ZmPP104 | 11.40940774 | 11.15006799 | 11.71256572 | 11.69860855 | 0.259339756 | 0.013957 |
| ZmPP111 | 8.827907778 | 8.582086321 | 9.283204092 | 9.135676809 | 0.245821458 | 0.147527 |
| ZmPP72  | 9.052378292 | 8.834129203 | 8.964701106 | 9.051506399 | 0.218249089 | -0.08681 |
| ZmPP41  | 8.795852779 | 8.592134847 | 7.869495671 | 7.622040037 | 0.203717932 | 0.247456 |
| ZmPP84  | 14.53613877 | 14.38874864 | 14.75931945 | 14.29319314 | 0.147390133 | 0.466126 |
| ZmPP121 | 8.803380791 | 8.679977983 | 8.754870179 | 8.374756048 | 0.123402808 | 0.380114 |
| ZmPP26  | 12.59527027 | 12.48276331 | 12.45083416 | 12.62104893 | 0.112506965 | -0.17021 |
| ZmPP134 | 11.53810576 | 11.43359653 | 11.08074709 | 11.38406728 | 0.104509229 | -0.30332 |
| ZmPP65  | 7.843044935 | 7.754314124 | 7.75712142  | 7.802142855 | 0.088730811 | -0.04502 |
| ZmPP122 | 8.353554798 | 8.281980769 | 7.634827196 | 8.440722238 | 0.071574028 | -0.8059  |
| ZmPP102 | 10.02733753 | 10.00133547 | 10.04603802 | 10.24541398 | 0.02600206  | -0.19938 |
| ZmPP52  | 10.63141674 | 10.61815302 | 11.40187819 | 11.59974371 | 0.013263724 | -0.19787 |
| ZmPP69  | 5.077133624 | 7.282318234 | 5.538140102 | 7.372384707 | -2.20518461 | -1.83424 |
| ZmPP101 | 12.49975932 | 14.2514791  | 12.88271088 | 13.79631736 | -1.75171978 | -0.91361 |
| ZmPP87  | 9.573942564 | 11.17696113 | 9.71291012  | 10.98352452 | -1.60301857 | -1.27061 |
| ZmPP118 | 7.932189158 | 9.294393076 | 9.39631727  | 10.58208216 | -1.36220392 | -1.18576 |
| ZmPP137 | 10.51288511 | 11.77908807 | 10.38835156 | 11.42468527 | -1.26620296 | -1.03633 |
| ZmPP33  | 9.849331705 | 10.90241773 | 10.15551994 | 11.19747396 | -1.05308602 | -1.04195 |
| ZmPP36  | 10.5219866  | 11.56721042 | 10.46274943 | 11.93737022 | -1.04522382 | -1.47462 |
| ZmPP58  | 14.51929284 | 15.55102517 | 14.63094204 | 15.25302329 | -1.03173233 | -0.62208 |
| ZmPP16  | 11.6978626  | 12.69355374 | 10.93144032 | 12.06386002 | -0.99569114 | -1.13242 |
| ZmPP67  | 8.574070758 | 9.53596328  | 8.272909077 | 9.161106887 | -0.96189252 | -0.8882  |
| ZmPP11  | 5.919962293 | 6.790958995 | 6.351684829 | 7.30283055  | -0.8709967  | -0.95115 |
| ZmPP18  | 6.21815879  | 7.059952344 | 7.525866108 | 6.928311092 | -0.84179355 | 0.597555 |
| ZmPP68  | 4.492661468 | 5.258593634 | 5.454760398 | 5.421476167 | -0.76593217 | 0.033284 |
| ZmPP34  | 10.21174518 | 10.91991307 | 9.473212728 | 10.32163902 | -0.70816789 | -0.84843 |
| ZmPP131 | 11.65519905 | 12.33595773 | 11.55991226 | 12.28205263 | -0.68075868 | -0.72214 |
| ZmPP126 | 7.102282082 | 7.753509574 | 7.340247912 | 7.017268766 | -0.65122749 | 0.322979 |
| ZmPP119 | 7.429439521 | 8.030547491 | 7.747943391 | 8.679577931 | -0.60110797 | -0.93163 |
| ZmPP125 | 10.32511887 | 10.92122712 | 10.29805543 | 10.66911358 | -0.59610825 | -0.37106 |
| ZmPP62  | 11.87225071 | 12.4635103  | 12.2331553  | 12.38908369 | -0.59125958 | -0.15593 |
| ZmPP93  | 7.970683395 | 8.555648074 | 8.346805335 | 8.921558197 | -0.58496468 | -0.57475 |
| ZmPP51  | 9.969956144 | 10.52048361 | 10.25367302 | 10.68825889 | -0.55052747 | -0.43459 |
| ZmPP23  | 8.777454733 | 9.315626121 | 8.995376177 | 9.604484637 | -0.53817139 | -0.60911 |
| ZmPP5   | 12.05197729 | 12.56189886 | 12.15279687 | 12.57742698 | -0.50992157 | -0.42463 |
| ZmPP48  | 3.234968533 | 3.735295915 | 3.212038718 | 3.413069835 | -0.50032738 | -0.20103 |
| ZmPP55  | 12.62268777 | 13.11872034 | 12.68521424 | 13.11742765 | -0.49603257 | -0.43221 |
| ZmPP38  | 10.47790849 | 10.95955893 | 10.38913253 | 10.60857839 | -0.48165044 | -0.21945 |
| ZmPP81  | 6.974378438 | 7.447969098 | 7.686191942 | 7.361093855 | -0.47359066 | 0.325098 |
| ZmPP64  | 6.007273698 | 6.475702227 | 6.705510087 | 6.308860655 | -0.46842853 | 0.396649 |
| ZmPP22  | 12.49339409 | 12.93528377 | 12.85284843 | 12.96069038 | -0.44188968 | -0.10784 |
| ZmPP50  | 12.30368325 | 12.73889247 | 12.45554666 | 12.82942761 | -0.43520922 | -0.37388 |
| ZmPP114 | 6.87038672  | 7.290692087 | 7.062932153 | 7.158375707 | -0.42030537 | -0.09544 |
| ZmPP59  | 10.82573235 | 11.24038684 | 10.82375089 | 11.23008326 | -0.41465448 | -0.40633 |
| ZmPP110 | 8.613977428 | 9.009360308 | 8.622403909 | 8.823970023 | -0.39538288 | -0.20157 |
| ZmPP49  | 8.006241763 | 8.373195023 | 8.079665754 | 8.53356746  | -0.36695326 | -0.4539  |
| ZmPP17  | 10.23882323 | 10.58563349 | 10.34373678 | 10.43103484 | -0.34681026 | -0.0873  |
| ZmPP78  | 13.23025572 | 13.57067095 | 13.15054009 | 13.26598324 | -0.34041523 | -0.11544 |

|                |             |             |             |             |             |          |
|----------------|-------------|-------------|-------------|-------------|-------------|----------|
| <i>ZmPP109</i> | 10.68394312 | 11.02351954 | 10.41844639 | 11.02427095 | -0.33957642 | -0.60582 |
| <i>ZmPP25</i>  | 7.089615128 | 7.415725769 | 6.698597392 | 6.472788379 | -0.32611064 | 0.225809 |
| <i>ZmPP157</i> | 4.129437666 | 4.455188119 | 4.744162066 | 4.732877149 | -0.32575045 | 0.011285 |
| <i>ZmPP14</i>  | 11.93304484 | 12.25252474 | 12.37330312 | 12.41089397 | -0.3194799  | -0.03759 |
| <i>ZmPP20</i>  | 10.1836122  | 10.49355381 | 11.08250021 | 11.50827546 | -0.30994161 | -0.42578 |
| <i>ZmPP117</i> | 10.70992361 | 10.96436273 | 10.89236554 | 10.85740645 | -0.25443912 | 0.034959 |
| <i>ZmPP71</i>  | 9.332451457 | 9.579512643 | 9.635133031 | 9.35282287  | -0.24706119 | 0.28231  |
| <i>ZmPP46</i>  | 13.30265007 | 13.54318464 | 13.37996539 | 13.56451658 | -0.24053457 | -0.18455 |
| <i>ZmPP83</i>  | 11.75396982 | 11.95401285 | 11.71917909 | 12.11983824 | -0.20004303 | -0.40066 |
| <i>ZmPP12</i>  | 10.52157602 | 10.72137928 | 10.2901046  | 10.44639843 | -0.19980326 | -0.15629 |
| <i>ZmPP75</i>  | 10.92287398 | 11.1117101  | 10.87859418 | 11.18825841 | -0.18883612 | -0.30966 |
| <i>ZmPP1</i>   | 11.58843178 | 11.7663909  | 11.82654245 | 11.68191821 | -0.17795913 | 0.144624 |
| <i>ZmPP140</i> | 13.5810591  | 13.70339399 | 13.75399734 | 13.79006624 | -0.12233489 | -0.03607 |
| <i>ZmPP100</i> | 11.49131071 | 11.56189806 | 11.75303982 | 11.66097809 | -0.07058735 | 0.092062 |
| <i>ZmPP61</i>  | 4.015074936 | 4.080932188 | 5.210206929 | 5.037459281 | -0.06585725 | 0.172748 |
| <i>ZmPP45</i>  | 10.72859672 | 10.78414145 | 10.69703114 | 10.74813235 | -0.05554473 | -0.0511  |
| <i>ZmPP150</i> | 14.07249713 | 14.11808268 | 14.1082653  | 14.25062156 | -0.04558556 | -0.14236 |
| <i>ZmPP136</i> | 11.84644124 | 11.89063653 | 11.88100167 | 11.92463723 | -0.04419529 | -0.04364 |
| <i>ZmPP130</i> | 4.459682464 | 4.468789664 | 4.402339837 | 5.267951368 | -0.0091072  | -0.86561 |
| <i>ZmPP15</i>  | 6.075264989 | 6.0783458   | 5.757956162 | 5.438878048 | -0.00308081 | 0.319078 |
