# Supplementary material for: Maize protein phosphatase gene family: identification and molecular characterization
Source: PubMed Central journal article supplement (PMC4169795; doi:10.1186/1471-2164-15-773), 2014-09-09
Supplement: 12864_2014_6458_MOESM22_ESM.pdf [file 12864_2014_6458_MOESM22_ESM.pdf]

**Table S12.** List of expression values of MAPK cascades genes in cold stress.

DH7 log(c), DH7 log(k), DL3 log(c), DL3 log(k) means intensity (AU) of fluorescence of labeled aaRNA from cold-treatment (c) or control (k) hybridizing to the probe, shown as log<sub>2</sub> in the respective maize line.

DH7 log(c/k), DL3 log(c/k) means log<sub>2</sub> of ratio of expression in cold-treated vs. control of the probe in the respective maize line, respectively.

Values in red and blue indicate the fold increase and decrease in expression in the drought-stressed tissue, respectively.

| Name              | DH7 log(c)  | DH7 log(k)  | DL3 log(c)  | DL3 log(k)  | DH7 log(c/k) | DL3 log(c/k) |
|-------------------|-------------|-------------|-------------|-------------|--------------|--------------|
| <i>ZmMPK12</i>    | 9.254116583 | 7.200538964 | 8.20086412  | 7.333360334 | 2.053577619  | 0.867503787  |
| <i>ZmMPK8</i>     | 13.22432994 | 11.41630225 | 13.11966704 | 11.50011744 | 1.808027689  | 1.619549601  |
| <i>ZmMPK6</i>     | 15.14855681 | 13.48505243 | 15.06134986 | 13.27489091 | 1.663504377  | 1.786458955  |
| <i>ZmMPK11</i>    | 15.31213933 | 13.96328979 | 14.30758897 | 13.48709859 | 1.348849546  | 0.820490376  |
| <i>ZmMPK15</i>    | 10.53304883 | 9.745627793 | 10.80796001 | 9.83340504  | 0.787421036  | 0.974554965  |
| <i>ZmSIMK1</i>    | 13.13658422 | 12.6242119  | 12.65871102 | 12.7195762  | 0.512372319  | -0.060865177 |
| <i>ZmMPK18</i>    | 4.756354241 | 4.311253469 | 4.056122838 | 4.429762786 | 0.445100772  | -0.373639948 |
| <i>ZmMPK7</i>     | 6.683178896 | 6.468164744 | 6.976859148 | 6.648353878 | 0.215014152  | 0.328505269  |
| <i>ZmMPK17</i>    | 5.192545189 | 4.99732629  | 6.322607684 | 7.289694171 | 0.195218898  | -0.967086487 |
| <i>ZmMPK14</i>    | 10.26658238 | 10.15206192 | 9.017493217 | 10.32444081 | 0.114520462  | -1.306947597 |
| <i>ZmMPK5</i>     | 12.85316178 | 12.75161444 | 13.07026569 | 12.91017476 | 0.101547339  | 0.160090937  |
| <i>ZmMPK13</i>    | 12.36386923 | 13.24702517 | 11.47730413 | 12.7159848  | -0.883155944 | -1.238680673 |
| <i>ZmMPK19</i>    | 8.487688796 | 9.030434262 | 7.564654052 | 8.248587891 | -0.542745467 | -0.683933839 |
| <i>ZmMPK9</i>     | 14.21169279 | 14.21449407 | 13.94709853 | 14.42509794 | -0.002801284 | -0.477999414 |
| <i>ZmMKK4</i>     | 9.777898743 | 8.127095532 | 10.07403    | 8.46065406  | 1.650803211  | 1.613375939  |
| <i>ZmMKK2</i>     | 13.76736701 | 12.15013463 | 13.45736558 | 12.60051611 | 1.61723238   | 0.856849477  |
| <i>ZmMEK1</i>     | 12.893139   | 12.2177944  | 12.98147008 | 12.53279652 | 0.675344602  | 0.448673556  |
| <i>ZmMKK3</i>     | 12.1085362  | 11.94255781 | 12.24325035 | 11.67407897 | 0.165978392  | 0.569171386  |
| <i>ZmMAPKKK1</i>  | 8.189048157 | 6.181811273 | 7.281574545 | 6.471011025 | 2.007236885  | 0.81056352   |
| <i>ZmMAPKKK17</i> | 12.41205315 | 10.45336959 | 12.6508795  | 10.4684761  | 1.958683554  | 2.182403405  |
| <i>ZmZIK9</i>     | 9.735825897 | 7.832775883 | 10.12909004 | 7.733996513 | 1.903050014  | 2.395093527  |
| <i>ZmRaf43</i>    | 8.914847884 | 7.364287245 | 9.49896839  | 7.143936482 | 1.550560639  | 2.355031908  |
| <i>ZmRaf17</i>    | 9.893726452 | 8.510778546 | 9.948100239 | 9.324363095 | 1.382947906  | 0.623737145  |
| <i>ZmRaf24</i>    | 5.117494528 | 3.817492973 | 5.399006486 | 4.741912681 | 1.300001555  | 0.657093805  |
| <i>ZmRaf21</i>    | 14.71892051 | 13.5437152  | 14.56757306 | 13.49674125 | 1.17520531   | 1.070831813  |
| <i>ZmMAPKKK14</i> | 10.34847224 | 9.208019176 | 10.47601244 | 9.700474473 | 1.140453066  | 0.775537972  |
| <i>ZmRaf30</i>    | 13.10940745 | 11.97485869 | 13.34146547 | 12.48621839 | 1.134548752  | 0.855247073  |
| <i>ZmMAPKKK15</i> | 8.532986403 | 7.405960399 | 8.407826647 | 7.769676551 | 1.127026004  | 0.638150096  |
| <i>ZmRaf36</i>    | 12.93593327 | 11.86453755 | 13.27170465 | 12.11582454 | 1.071395725  | 1.155880108  |
| <i>ZmRaf33</i>    | 11.43664635 | 10.6636381  | 11.55813477 | 10.74647079 | 0.773008251  | 0.811663983  |
| <i>ZmMAPKKK12</i> | 13.02316267 | 12.37400542 | 13.34745165 | 12.09574693 | 0.649157243  | 1.25170472   |
| <i>ZmRaf41</i>    | 11.33842266 | 10.76511517 | 11.14448343 | 10.97057874 | 0.573307485  | 0.173904693  |
| <i>ZmMAPKKK20</i> | 13.00805577 | 12.45398296 | 13.39232267 | 12.63840526 | 0.55407281   | 0.753917401  |
| <i>ZmRaf10</i>    | 11.56493173 | 11.08143532 | 11.10515527 | 10.87224434 | 0.48349641   | 0.232910932  |
| <i>ZmRaf34</i>    | 12.76782754 | 12.28815883 | 12.98659957 | 12.45851406 | 0.479668705  | 0.528085508  |
| <i>ZmMAPKKK9</i>  | 4.9261356   | 4.47370648  | 4.306421197 | 5.178268389 | 0.45242912   | -0.871847192 |
| <i>ZmRaf46</i>    | 5.685994702 | 5.294430364 | 5.461370454 | 5.486057814 | 0.391564338  | -0.02468736  |
| <i>ZmRaf22</i>    | 7.167631948 | 6.797945569 | 7.7060638   | 7.014447016 | 0.369686379  | 0.691616783  |
| <i>ZmRaf13</i>    | 9.313627673 | 8.969110755 | 9.553672013 | 9.156736227 | 0.344516918  | 0.396935786  |
| <i>ZmMAPKKK22</i> | 5.717093852 | 5.39765161  | 6.260692066 | 5.609134973 | 0.319442241  | 0.651557093  |
| <i>ZmMAPKKK4</i>  | 5.692196525 | 5.381332141 | 5.051736969 | 4.805321031 | 0.310864384  | 0.246415937  |
| <i>ZmZIK5</i>     | 6.798246672 | 6.598506146 | 6.385781281 | 6.559547568 | 0.199740526  | -0.173766286 |
| <i>ZmRaf27</i>    | 7.980814485 | 7.813456789 | 8.463429828 | 7.644492232 | 0.167357697  | 0.818937596  |
| <i>ZmRaf3</i>     | 5.634369727 | 5.619876665 | 6.084586514 | 6.262405428 | 0.014493062  | -0.177818914 |

|                   |             |             |             |             |              |              |
|-------------------|-------------|-------------|-------------|-------------|--------------|--------------|
| <i>ZmRaf48</i>    | 5.307389694 | 5.304565809 | 5.330829948 | 4.250487882 | 0.002823885  | 1.080342066  |
| <i>ZmRaf8</i>     | 4.675533846 | 6.686077069 | 5.020401769 | 4.72959565  | -2.010543223 | 0.290806119  |
| <i>ZmZIK1</i>     | 10.09385552 | 11.90580262 | 10.11753305 | 11.35247381 | -1.811947105 | -1.234940767 |
| <i>ZmZIK4</i>     | 5.616491563 | 7.086842371 | 6.051311611 | 6.598966122 | -1.470350808 | -0.547654511 |
| <i>ZmMAPKKK26</i> | 5.27517407  | 6.610889577 | 6.974709664 | 6.755000023 | -1.335715507 | 0.219709641  |
| <i>ZmRaf42</i>    | 5.433701907 | 6.723931409 | 5.906491003 | 6.921752348 | -1.290229502 | -1.015261346 |
| <i>ZmRaf25</i>    | 12.02212757 | 13.17998342 | 12.03284736 | 12.84867499 | -1.157855853 | -0.815827627 |
| <i>ZmMAPKKK24</i> | 8.603284666 | 9.515872955 | 8.48110041  | 8.93587197  | -0.912588289 | -0.45477156  |
| <i>ZmMAPKKK19</i> | 3.122488733 | 3.994537715 | 4.054041929 | 4.428658957 | -0.872048981 | -0.374617028 |
| <i>ZmRaf44</i>    | 12.05309393 | 12.85911873 | 12.00965786 | 12.84286281 | -0.806024803 | -0.833204957 |
| <i>ZmRaf5</i>     | 11.39152877 | 12.15146194 | 11.05349106 | 11.57888824 | -0.759933176 | -0.525397173 |
| <i>ZmRaf18</i>    | 5.89235873  | 6.582025782 | 6.771543652 | 7.526038503 | -0.689667052 | -0.754494851 |
| <i>ZmRaf9</i>     | 10.98029623 | 11.6699405  | 10.87310034 | 11.26539626 | -0.689644269 | -0.392295916 |
| <i>ZmZIK2</i>     | 7.474823641 | 8.042468285 | 7.877490428 | 7.659317647 | -0.567644644 | 0.218172781  |
| <i>ZmZIK6</i>     | 6.935373239 | 7.478075967 | 7.753648509 | 7.020270619 | -0.542702728 | 0.73337789   |
| <i>ZmRaf15</i>    | 9.709932613 | 10.11948442 | 9.924222955 | 10.09145835 | -0.409551807 | -0.16723539  |
| <i>ZmRaf38</i>    | 6.531919069 | 6.905286665 | 7.075857156 | 7.762922111 | -0.373367596 | -0.687064955 |
| <i>ZmRaf35</i>    | 6.617802348 | 6.978270192 | 6.322781806 | 6.594760653 | -0.360467845 | -0.271978847 |
| <i>ZmMAPKKK18</i> | 4.253833586 | 4.504590288 | 5.049186055 | 3.613424905 | -0.250756702 | 1.43576115   |
| <i>ZmRaf11</i>    | 13.10141887 | 13.25022488 | 13.25289585 | 13.2594104  | -0.148806013 | -0.006514552 |
| <i>ZmZIK3</i>     | 7.730162696 | 7.835001822 | 7.547250841 | 8.044467974 | -0.104839126 | -0.497217132 |
| <i>ZmRaf49</i>    | 4.886999838 | 4.974329999 | 3.852374191 | 4.102692639 | -0.087330161 | -0.250318449 |
| <i>ZmRaf26</i>    | 11.62864962 | 11.68901412 | 11.55233054 | 11.71508905 | -0.060364498 | -0.162758518 |
| <i>ZmRaf39</i>    | 10.62829996 | 10.67119362 | 10.06093834 | 9.874994743 | -0.042893652 | 0.1859436    |
| <i>ZmRaf14</i>    | 8.922694947 | 8.935517068 | 9.109013834 | 9.064372486 | -0.012822121 | 0.044641348  |
| <i>ZmMAP4K1</i>   | 7.17023491  | 6.683130257 | 7.358496603 | 6.884089897 | 0.487104652  | 0.474406706  |
| <i>ZmMAP4K2</i>   | 7.17023491  | 6.683130257 | 7.358496603 | 6.884089897 | 0.487104652  | 0.474406706  |
| <i>ZmMAP4K4</i>   | 3.47329336  | 4.493932595 | 3.564888674 | 5.198293706 | -1.020639236 | -1.633405032 |
| <i>ZmMIK</i>      | 8.78436926  | 9.587351631 | 9.276597284 | 9.539646825 | -0.802982371 | -0.263049541 |
| <i>ZmMAP4K3</i>   | 7.420463901 | 8.049236824 | 7.749727889 | 8.521599719 | -0.628772924 | -0.77187183  |
| <i>ZmMAP4K8</i>   | 2.707298071 | 3.106683345 | 2.796541081 | 2.497869603 | -0.399385274 | 0.298671479  |
| <i>ZmMAP4K5</i>   | 11.42759805 | 11.73388569 | 11.84504307 | 11.72480653 | -0.306287636 | 0.120236547  |
| <i>ZmMAP4K7</i>   | 5.732740809 | 5.752620162 | 5.878489116 | 6.57958658  | -0.019879354 | -0.701097464 |
