# Supplementary material for: Maize protein phosphatase gene family: identification and molecular characterization
Source: PubMed Central journal article supplement (PMC4169795; doi:10.1186/1471-2164-15-773), 2014-09-09
Supplement: 12864_2014_6458_MOESM23_ESM.pdf [file 12864_2014_6458_MOESM23_ESM.pdf]

**Table S13.** List of promoters in ZmPP genes.

| <b>Gene</b>    | <b>Cis-regulatory elements</b>              |
|----------------|---------------------------------------------|
| <b>PP2C</b>    |                                             |
| <i>ZmPP6</i>   | A-box,ABRE,CE3,G-box,MBS                    |
| <i>ZmPP31</i>  | A-box,ABRE,CCAAT-box,G-box                  |
| <i>ZmPP39</i>  | A-box,ABRE,CE3,G-box                        |
| <i>ZmPP53</i>  | A-box,ABRE,CE3,G-box,MBS                    |
| <i>ZmPP56</i>  | A-box,ABRE,CCAAT-box,CE3,G-box              |
| <i>ZmPP57</i>  | A-box,G-box,MBS,MRE,W box                   |
| <i>ZmPP107</i> | ABRE,CCAAT-box,G-Box,MBS,W box              |
| <i>ZmPP108</i> | A-box,C-repeat/DRE,G-box,MBS                |
| <i>ZmPP112</i> | A-box,ABRE,CCAAT-box,CE3,G-box,MRE          |
| <i>ZmPP121</i> | A-box,ABRE,CE3,G-box,W box                  |
| <i>ZmPP123</i> | A-box,ABRE,C-repeat/DRE,CCAAT-box,G-box,MRE |
| <i>ZmPP127</i> | A-box,ABRE,G-box                            |
| <i>ZmPP130</i> | A-box,ABRE,G-box,MRE                        |
| <i>ZmPP132</i> | A-box,ABRE,CE3,G-box                        |
| <i>ZmPP134</i> | A-box,ABRE,G-box                            |
| <i>ZmPP154</i> | A-box,ABRE,CCAAT-box,G-box                  |
| <i>ZmPP8</i>   | A-box,ABRE,CCAAT-box,G-box,MBS              |
| <i>ZmPP43</i>  | A-box,CCAAT-box,MBS,W box                   |
| <i>ZmPP60</i>  | A-box,ABRE,G-box,MBS,W box                  |
| <i>ZmPP61</i>  | ABRE,G-box,MBS,W box                        |
| <i>ZmPP97</i>  | A-box,ABRE,G-box,MBS,MRE,W box              |
| <i>ZmPP147</i> | ABRE,CCAAT-box,G-box                        |
| <i>ZmPP7</i>   | G-box                                       |
| <i>ZmPP24</i>  | A-box,ABRE,CCAAT-box,G-box,GCC box,MBS      |
| <i>ZmPP30</i>  | A-box,MBS,W box                             |
| <i>ZmPP77</i>  | CCAAT-box,G-box,MBS                         |
| <i>ZmPP126</i> | ABRE,G-box,MBS,W box                        |
| <i>ZmPP148</i> | ABRE,G-box                                  |
| <i>ZmPP155</i> | G-box,MBS,W box                             |
| <i>ZmPP2</i>   | ABRE,G-box,MRE                              |
| <i>ZmPP3</i>   | A-box,ABRE,G-box                            |
| <i>ZmPP4</i>   | A-Box,MBS                                   |
| <i>ZmPP21</i>  | A-box,ABRE,G-box,MBS                        |
| <i>ZmPP25</i>  | ABRE,CCAAT-box,G-box,GCC box                |
| <i>ZmPP28</i>  | A-box,ABRE,CE3,G-box,MBS,W box              |
| <i>ZmPP80</i>  | ABRE,G-box,MBS,MRE                          |
| <i>ZmPP83</i>  | CCAAT-box,G-box,MBS                         |
| <i>ZmPP92</i>  | CCAAT-box,MBS                               |
| <i>ZmPP99</i>  | A-box,G-box,MBS,W box                       |

---

ZmPP144 ABRE,G-box  
ZmPP149 CCAAT-box,G-box,MRE  
ZmPP151 A-box,CCAAT-box,G-box,MBS,W box  
ZmPP12 G-box,MBS  
ZmPP35 A-box,ABRE,CCAAT-box,G-Box  
ZmPP41 A-box,ABRE,CCAAT-box,G-box,MBS,W box  
ZmPP63 G-box,W box  
ZmPP69 ABRE,G-box  
ZmPP70 A-box,CCAAT-box,G-box,MRE  
ZmPP71  
ZmPP74 A-box,G-box,MRE,W box  
ZmPP87 ABRE,CCAAT-box,G-box,MBS,W box  
ZmPP89 ABRE,G-box  
ZmPP105 A-box,ABRE,CCAAT-box,G-box,MBS  
ZmPP116 ABRE,CCAAT-box,G-box,GCC box,MBS,W box  
ZmPP117 G-Box,MBS,MRE,W box  
ZmPP128 ABRE,G-box,MBS,MRE  
ZmPP27 g-box,W box  
ZmPP40 A-box,ABRE,CCAAT-box,G-box,MBS  
ZmPP115 ABRE,G-box  
ZmPP152 GCC box,MRE  
ZmPP158 G-box,MBS  
ZmPP159 G-box,MBS,W box  
ZmPP26 A-box,ABRE,G-box,MBS,  
ZmPP72 A-box,ABRE,CCAAT-box,CE1,G-box  
ZmPP76 A-box,ABRE,CCAAT-box,G-box  
ZmPP84 A-box,CCAAT-box,G-box  
ZmPP86 ABRE,G-box  
ZmPP109 A-box,ABRE,CCAAT-box,G-box,MBS  
ZmPP122 C-box,G-box,MBS,W box  
ZmPP129 G-box  
ZmPP10 A-box,DRE,MBS  
ZmPP66 ABRE,G-box,MBS,W box  
ZmPP95 ABRE,CCAAT-box,G-box,MBS,W box  
ZmPP111 CCAAT-box,G-box,MBS  
ZmPP137 A-box,ABRE,G-box,MBS,W box  
ZmPP143 ABRE,G-box  
ZmPP153 A-box,ABRE,G-box,MBS  
ZmPP9 G-box  
ZmPP29 ABRE,CCAAT-box,G-Box,MBS,MRE  
ZmPP42 ABRE,G-box,MBS  
ZmPP49 CCAAT-box,MRE  
ZmPP64 MBS,W box

---

---

ZmPP90 A-box,CE3,G-box,MBS,W box  
ZmPP113 A-box,ABRE,CE3,G-box,GCC box,MBS,W box  
ZmPP118 CCAAT-box,G-box,MRE  
ZmPP141 A-box,G-box  
ZmPP146 A-box,G-box,MBS,W box  
ZmPP156 ABRE,G-box,MBS  
ZmPP85 ABRE,G-box  
ZmPP100 ABRE,G-box,MBS  
ZmPP114 ABRE,CCAAT-box,G-box  
ZmPP138 ABRE,G-box  
ZmPP139 ABRE,G-box  
ZmPP157 ABRE,CCAAT-box,G-box,MBS,MRE,W box  
ZmPP23 ABRE,G-Box,MBS  
ZmPP46 CCAAT-box,G-box  
ZmPP78 ABRE,G-box  
ZmPP82 A-box,ABRE,G-box,MBS,MRE  
ZmPP91 A-box,ABRE,G-box  
ZmPP142 ABRE,G-box,MBS  
ZmPP44 G-box,GCC box,MBS  
ZmPP37 CCAAT-box,G-box,W box  
ZmPP58 CCAAT-box,G-box,GCC-box,MBS  
ZmPP110 CCAAT-box

#### **PTP**

ZmPP1 A-box,ABRE,CCAAT-box,G-box,W box  
ZmPP16 A-box,ABRE,CCAAT-box,G-box,MBS,W box  
ZmPP18 A-box,ABRE,G-box,MBS  
ZmPP20 A-box,ABRE,CCAAT-box,G-box,MBS  
ZmPP33 ABRE,G-box,MBS  
ZmPP34 A-box,ABRE,G-box,MBS,W box  
ZmPP38 ABRE,G-box,MBS  
ZmPP45 ABRE,CCAAT-box,G-box  
ZmPP48 A-box,CCAAT-box,MBS  
ZmPP52 G-box  
ZmPP54 A-box,G-box,MBS  
ZmPP59 ABRE,CCAAT-box,G-box,GCC box  
ZmPP62 A-box,ABRE,CCAAT-box,G-box,MBS  
ZmPP67 A-box,G-box,MBS,W box  
ZmPP68 ABRE,DRE,G-box,MBS,MRE  
ZmPP93 MBS  
ZmPP94 ABRE,C-repeat/DRE,G-box,W box  
ZmPP101 A-box,ABRE,CCAAT-box,G-box  
ZmPP102 ABRE,G-box,MBS

---

---

ZmPP106 A-box,ABRE,G-box  
ZmPP120 A-box,ABRE,G-box,MBS  
ZmPP125  
ZmPP131 A-box,ABRE,G-box,MBS,W box  
ZmPP133 ABRE,G-box  
ZmPP140 ABRE,G-box  
ZmPP51 MBS  
ZmPP47 G-box,NBS  
ZmPP14 G-Box,MBS  
ZmPP145 G-box,MBS

## **PP2A**

ZmPP5 ABRE,G-box,MBS,W box  
ZmPP11 A-box,G-box  
ZmPP13  
ZmPP15 G-box,MBS  
ZmPP17 ABRE,CCAAT-box,G-Box  
ZmPP19 A-box,ABRE,G-box,MBS  
ZmPP22 CCAAT-box,G-box,MBS,MRE  
ZmPP32 ABRE,CCAAT-box,G-box,MBS  
ZmPP36 ABRE,G-box  
ZmPP50 A-box,G-box  
ZmPP55 ABRE,G-box,MBS  
ZmPP65 G-box,MBS  
ZmPP73 A-box,ABRE,CCAAT-box,G-box,MBS,MRE,W box  
ZmPP75 ABRE,CCAAT-box,G-box,MBS  
ZmPP79 A-box,ABRE,CE3,G-box,MBS,MRE  
ZmPP81 G-box,MBS,MRE  
ZmPP88 A-box,CCAAT-box,MBS  
ZmPP96 A-box,ABRE,G-box,MBS  
ZmPP98 ABRE,CCAAT-box,G-box,MBS  
ZmPP103 A-box,CCAAT-box,MBS  
ZmPP104 MBS,MRE,W box  
ZmPP119 G-box,MBS  
ZmPP124 ABRE,CCAAT-box,G-box,MBS,W box  
ZmPP135 C-box,G-box  
ZmPP136 G-box,MRE  
ZmPP150 G-box,MBS

---
