# Supplementary material for: Maize protein phosphatase gene family: identification and molecular characterization
Source: PubMed Central journal article supplement (PMC4169795; doi:10.1186/1471-2164-15-773), 2014-09-09
Supplement: 12864_2014_6458_MOESM24_ESM.pdf [file 12864_2014_6458_MOESM24_ESM.pdf]

**Table S14.** List of predicted miRNA-regulated ZmPP genes.

| miRNA          | Target Gene   | Name           | Score | Mismatches | Alignment                                            |
|----------------|---------------|----------------|-------|------------|------------------------------------------------------|
|                | GRMZM2G074489 | <i>ZmPP152</i> | 88    | 2.5        | 3' UCCGACAUGAGAGAGAGAAGA 5'<br>         : : :        |
| zma-miR529-5p  |               |                |       |            | 5' AGGCUGUUCUUUUUUUCUUCU 3'                          |
|                | GRMZM2G151087 | <i>ZmPP47</i>  | 78    | 4          | 3' UCCGACAUGAGAGAGAGAAGA 5'<br>:      :     : :      |
|                |               |                |       |            | 5' GUGCUGUCUCUCUUGUUUCU 3'                           |
|                | GRMZM2G038195 | <i>ZmPP75</i>  | 86    | 3          | 3' GUCUCGAGGGAAGUUAGGUUU 5'<br>      :     :         |
| zma-miR159k-3p |               |                |       |            | 5' CAGAACUCCUCAAUUCAC 3'                             |
|                | GRMZM2G133464 | <i>ZmPP88</i>  | 83    | 3.5        | 3' GUCUCGAGGGAAGUUAGGUUU 5'<br>      :     : :       |
|                |               |                |       |            | 5' CAGAACUCCUCAAUUCGAC 3'                            |
| zma-miR169m-5p |               |                |       |            | 3' AUCCGUUCGGUAAGAACCGAU 5'<br> :       :     : :    |
|                |               |                |       |            | 5' UGGACUAGCCGUUCUUGGUUG 3'                          |
|                | GRMZM2G136765 | <i>ZmPP128</i> | 82    | 4          | 3' GGA-ACUUGGUC-UGUUUGUUUG 5'<br>        :       : : |
| zma-miR166j-5p |               |                |       |            | 5' CCUCUGAAUAGUACAAACAAAU 3'                         |
|                | GRMZM2G127374 | <i>ZmPP16</i>  | 83    | 3          | 3' GUCCCGUCGAGAGGAAACCGU 5'<br>    :    :            |
| zma-miR399d-3p |               |                |       |            | 5' CAUGGUAGCUUCCUUUGGAA 3'                           |
|                | GRMZM2G161544 | <i>ZmPP117</i> | 75    | 4          | 3' ACAUCGGUUCUUGUUGAACGG 5'<br>     :      : : :     |
| zma-miR169a-3p |               |                |       |            | 5' AGUAGCCGGGAA-AGCUUGUC 3'                          |
|                | GRMZM2G127374 | <i>ZmPP16</i>  | 80    | 3.5        | 3' GUCCCGUUGAGAGGAAACCGU 5'<br>    : : : :           |
| zma-miR399i-3p |               |                |       |            | 5' CAUGGUAGCUUCCUUUGGAA 3'                           |
|                | GRMZM2G127374 | <i>ZmPP16</i>  | 80    | 3.5        | 3' GUCCCGUUGAGAGGAAACCGU 5'<br>    : : : :           |
| zma-miR399e-3p |               |                |       |            | 5' CAUGGUAGCUUCCUUUGGAA 3'                           |
|                | GRMZM2G038195 | <i>ZmPP75</i>  | 86    | 3          | 3' GUCUCGAGGGAAGUUAGGUUU 5'<br>      :     :         |
| zma-miR159f-3p |               |                |       |            | 5' CAGAACUCCUCAAUUCAC 3'                             |
|                | GRMZM2G133464 | <i>ZmPP88</i>  | 83    | 3.5        | 3' GUCUCGAGGGAAGUUAGGUUU 5'<br>      :     : :       |
|                |               |                |       |            | 5' CAGAACUCCUCAAUUCGAC 3'                            |
| zma-miR164f-3p |               |                |       |            | 3' CAACCUCUCCUCGCGUGCAC 5'<br>      :     :          |
|                |               |                |       |            | 5' GGCGGAGGAGGAGCGCGGUG 3'                           |
|                | GRMZM2G010855 | <i>ZmPP6</i>   | 77    | 4          | 3' AUCCGUUCGGUAAGAACCGAU 5'<br> :       :     : :    |
| zma-miR169n-5p |               |                |       |            | 5' UGGACUAGCCGUUCUUGGUUG 3'                          |
|                | GRMZM2G109496 | <i>ZmPP157</i> | 75    | 4          | 3' ACACUAUAACCGUGCCGAGUU 5'<br>         : :          |
| zma-miR171f-3p |               |                |       |            | 5' UGUCAUACUGGUUCGGUCAA 3'                           |
|                | GRMZM2G420926 | <i>ZmPP150</i> | 77    | 4          | 3' CUACUUUGACGUGUCGUACUAG 5'<br>    :      : :     : |
| zma-miR167e-3p |               |                |       |            | 5' GAUGGAAC-GUACGGCAAGAUU 3'                         |
|                | GRMZM2G161544 | <i>ZmPP117</i> | 77    | 3.5        | 3' GAAUCGGUUCUCCGGACGG 5'<br>     :      : :         |
| zma-miR169n-3p |               |                |       |            | 5' CUUAGCUGGGAAGCUUGUC 3'                            |
| zma-miR160f-5p |               |                |       |            | 3' GCCGUAUGUC-CCUCGGUCCGU 5'<br>  : : :              |

|                |               |                |    |     |                        |                          |    |
|----------------|---------------|----------------|----|-----|------------------------|--------------------------|----|
|                |               |                |    |     | 5'                     | CGGUAUGUGAAGGAGCCAGGCA   | 3' |
|                |               |                |    |     | 3'                     | CGAUCGGUUCUUCUGGACGG     | 5' |
| zma-miR169o-3p | GRMZM5G818101 | <i>ZmPP121</i> | 77 | 3.5 | :    :    :            |                          |    |
|                |               |                |    |     | 5'                     | GCUGGCCGAGGAGGUCGGCC     | 3' |
|                |               |                |    |     | 3'                     | GGCCGUUCAGUAGGAACCGAC    | 5' |
| zma-miR169r-5p | GRMZM2G001243 | <i>ZmPP127</i> | 77 | 3.5 | :        :        :    |                          |    |
|                |               |                |    |     | 5'                     | CCGGCGGGU-AUUUUUGGUUG    | 3' |
|                |               |                |    |     | 3'                     | GUGU-GCACGGGACGAAGAGGU   | 5' |
| zma-miR164h-5p | GRMZM2G319357 | <i>ZmPP14</i>  | 78 | 3.5 | :                      |                          |    |
|                |               |                |    |     | 5'                     | CACAGCCUGCCCUCCUUCUCCG   | 3' |
|                |               |                |    |     | 3'                     | CUUGUCUACGACGUCCUCGAC    | 5' |
|                |               |                |    |     | :      :               |                          |    |
|                |               |                |    |     | 5'                     | GCGCAGGAGCUGCAGGAGCCG    | 3' |
|                |               |                |    |     | 3'                     | CUUG-UCUACGACGUCCUCG-AC  | 5' |
|                |               |                |    |     | :                      |                          |    |
| zma-miR159e-5p | GRMZM2G161544 | <i>ZmPP117</i> | 78 | 3.5 |                        |                          |    |
|                |               |                |    |     | 5'                     | GAGCCAGCUGCUGCAGGAGCCUG  | 3' |
|                |               |                |    |     | 3'                     | CUUGUCUACG-ACGUCCUCGAC   | 5' |
| zma-miR159e-5p | GRMZM2G028700 | <i>ZmPP11</i>  | 75 | 4   | :                      |                          |    |
|                |               |                |    |     | 5'                     | GGACACAUGGAUGCAGGAGUUG   | 3' |
|                |               |                |    |     | 3'                     | CUUGUCUACG-ACGUCCUCGAC   | 5' |
|                |               |                |    |     | :                      |                          |    |
|                |               |                |    |     | 5'                     | GGACACAUGGAUGCAGGAGUUG   | 3' |
|                |               |                |    |     | 3'                     | AUCCGUACCUCCGUAACCCUU    | 5' |
| zma-miR2118f   | GRMZM2G119079 | <i>ZmPP140</i> | 86 | 3   | :    :                 |                          |    |
|                |               |                |    |     | 5'                     | GAGGCGUGGAGGG-AUUGGGAA   | 3' |
|                |               |                |    |     | 3'                     | UAAGGUUCCCUAACGUGACUG    | 5' |
| zma-miR393c-3p | GRMZM2G003640 | <i>ZmPP20</i>  | 80 | 4   | :                    : |                          |    |
|                |               |                |    |     | 5'                     | AGUCCCAGGGGAUAGCACUGAU   | 3' |
|                |               |                |    |     | 3'                     | ACAUCGGUUCUUGUUGAACGG    | 5' |
| zma-miR169b-3p | GRMZM2G161544 | <i>ZmPP117</i> | 75 | 4   | :                      |                          |    |
|                |               |                |    |     | 5'                     | AGUAGCCGGGAA-AGCUUGUC    | 3' |
|                |               |                |    |     | 3'                     | AUCCGUUCGGUAAGAACCGAU    | 5' |
| zma-miR169q-5p | GRMZM2G010855 | <i>ZmPP6</i>   | 77 | 4   | :                      |                          |    |
|                |               |                |    |     | 5'                     | UGGACUAGCCGUUCUUGGUUG    | 3' |
|                |               |                |    |     | 3'                     | GUCUCGAGGGAAGUUAGGUUU    | 5' |
|                |               |                |    |     | :                      |                          |    |
| zma-miR159a-3p | GRMZM2G038195 | <i>ZmPP75</i>  | 86 | 3   |                        |                          |    |
|                |               |                |    |     | 5'                     | CAGAACUCCUCAAUUCAC       | 3' |
|                |               |                |    |     | 3'                     | GUCUCGAGGGAAGUUAGGUUU    | 5' |
|                |               |                |    |     | :                      |                          |    |
|                |               |                |    |     | 5'                     | CAGAACUCCUCAAUUCGAC      | 3' |
|                |               |                |    |     | 3'                     | GUC-AAGUU-C-UUUCGACACCUU | 5' |
|                |               |                |    |     |                        |                          |    |
|                |               |                |    |     | 5'                     | CAGAUUCAGUGUAAAGCUGUGGAA | 3' |
|                |               |                |    |     | 3'                     | GUC-AAGUU-C-UUUCGACACCUU | 5' |
| zma-miR396a-5p | GRMZM2G338631 | <i>ZmPP73</i>  | 78 | 3.5 |                        |                          |    |
|                |               |                |    |     | 5'                     | CAGAUUCAGUGUAAAGCUGUGGAA | 3' |
|                |               |                |    |     | 3'                     | GUC-AAGUU-C-UUUCGACACCUU | 5' |
|                |               |                |    |     |                        |                          |    |
|                |               |                |    |     | 5'                     | CAGAUUCAGUGUAAAGCUGUGGAA | 3' |
|                |               |                |    |     | 3'                     | GUC-AAGUU-C-UUUCGACACCUU | 5' |
|                |               |                |    |     |                        |                          |    |
|                |               |                |    |     | 5'                     | CAGAUUCAGUGUAAAGCUGUGGAA | 3' |
|                |               |                |    |     | 3'                     | AUCCUUACUCUCCGUAGUCCUU   | 5' |
| zma-miR2118a   | GRMZM2G081359 | <i>ZmPP64</i>  | 80 | 4   | :                      |                          |    |
|                |               |                |    |     | 5'                     | AAGGGGUGAGAGGCA-CGGGGA   | 3' |
|                |               |                |    |     | 3'                     | ACACGAGAGAGAGAAGACAGU    | 5' |
| zma-miR156j-5p | GRMZM2G158734 | <i>ZmPP137</i> | 81 | 4   |                        |                          |    |
|                |               |                |    |     | 5'                     | ACUGCUCUCUUUCUUCUGGUA    | 3' |

|                |                  |                |    |     |    |                        |    |
|----------------|------------------|----------------|----|-----|----|------------------------|----|
|                | GRMZM2G019819    | <i>ZmPP31</i>  | 75 | 3.5 | 3' | CUACCUCUCCUCUUGUGCAC   | 5' |
|                |                  |                |    |     |    | :      :               |    |
|                |                  |                |    |     | 5' | GA-GGAGGAGGAGCGCGUG    | 3' |
|                | GRMZM2G082487    | <i>ZmPP39</i>  | 75 | 4   | 3' | CUACCUCUCCUCUUGUG-CAC  | 5' |
|                |                  |                |    |     |    | :  :                   |    |
|                |                  |                |    |     | 5' | GAGGGAGAUGGAGGACGCCGUG | 3' |
| zma-miR164a-3p | GRMZM5G818101    | <i>ZmPP121</i> | 78 | 4   | 3' | CUACCUCUCCUCUUGUGCAC   | 5' |
|                |                  |                |    |     |    | :  :                   |    |
|                |                  |                |    |     | 5' | GAGGGAGAUGGAGGACCGUU   | 3' |
|                | GRMZM2G159811    | <i>ZmPP154</i> | 77 | 4   | 3' | CUACCUCUCCUCUUGUGCAC   | 5' |
|                |                  |                |    |     |    | :     :      :         |    |
|                |                  |                |    |     | 5' | GGCGGAGGAGGAGCGCGUG    | 3' |
|                | GRMZM2G038195    | <i>ZmPP75</i>  | 86 | 3   | 3' | GUCUCGAGGGAAGUUAGGUUU  | 5' |
|                |                  |                |    |     |    | :       :              |    |
|                |                  |                |    |     | 5' | CAGAACUCCUCAAUUAAC     | 3' |
| zma-miR159b-3p | GRMZM2G133464    | <i>ZmPP88</i>  | 83 | 3.5 | 3' | GUCUCGAGGGAAGUUAGGUUU  | 5' |
|                |                  |                |    |     |    | :       : :            |    |
|                |                  |                |    |     | 5' | CAGAACUCCUCAAUUCGAC    | 3' |
|                | GRMZM2G360455    | <i>ZmPP85</i>  | 75 | 4   | 3' | AGACUCACUCGGCUCGGUUGU  | 5' |
| zma-miR171d-5p |                  |                |    |     |    | : :                    |    |
|                |                  |                |    |     | 5' | UCUGACUUUGCUGGGCCAACA  | 3' |
|                | GRMZM2G003096    | <i>ZmPP46</i>  | 75 | 4   | 3' | ACAAACGACUACCAGUAGAUU  | 5' |
| zma-miR827-3p  |                  |                |    |     |    | : :                    |    |
|                |                  |                |    |     | 5' | UGUCUAUUGGUGCUAUCUAA   | 3' |
|                | GRMZM2G001243    | <i>ZmPP127</i> | 77 | 3.5 | 3' | GGCCGUUCAGUAGGAACCGAC  | 5' |
| zma-miR169c-5p |                  |                |    |     |    | :     : :              |    |
|                |                  |                |    |     | 5' | CCGGCGGGU-AUUUUUGGUUG  | 3' |
|                | GRMZM2G067910    | <i>ZmPP70</i>  | 76 | 3.5 | 3' | GAGUGCACAGGACGAAGAGGU  | 5' |
| zma-miR164e-5p |                  |                |    |     |    | :                      |    |
|                |                  |                |    |     | 5' | CUC-CGUUUCUUGCUUCUCCU  | 3' |
|                | AC155624.2_FG006 | <i>ZmPP2</i>   | 75 | 3.5 | 3' | GUCCUGUCGAGAGGAAACCGU  | 5' |
|                |                  |                |    |     |    | : :         :          |    |
|                |                  |                |    |     | 5' | CAGGACGGU-CUCCUCUGGUA  | 3' |
|                | GRMZM5G891266    | <i>ZmPP4</i>   | 75 | 3.5 | 3' | GUCCUGUCGAGAGGAAACCGU  | 5' |
|                |                  |                |    |     |    | : :         :          |    |
|                |                  |                |    |     | 5' | CAGGACGGU-CUCCUCUGGUA  | 3' |
|                | GRMZM5G833774    | <i>ZmPP3</i>   | 75 | 3.5 | 3' | GUCCUGUCGAGAGGAAACCGU  | 5' |
| zma-miR399b-3p |                  |                |    |     |    | : :         :          |    |
|                |                  |                |    |     | 5' | CAGGACGGU-CUCCUCUGGUA  | 3' |
|                | GRMZM2G010017    | <i>ZmPP151</i> | 78 | 3   | 3' | GUCCUGUCGAGAGGAAACCGU  | 5' |
|                |                  |                |    |     |    | :            :         |    |
|                |                  |                |    |     | 5' | CAGGACGGC-CUCCUCUGGUA  | 3' |
|                | GRMZM2G127374    | <i>ZmPP16</i>  | 80 | 3.5 | 3' | GUCCUGUCGAGAGGAAACCGU  | 5' |
|                |                  |                |    |     |    | : :    :               |    |
|                |                  |                |    |     | 5' | CAUGGUAGCUUCCUUUGGAA   | 3' |
|                | GRMZM2G319357    | <i>ZmPP14</i>  | 75 | 4   | 3' | CUCCU-UACUUCGACCAGGCU  | 5' |
| zma-miR166m-3p |                  |                |    |     |    | :         :            |    |
|                |                  |                |    |     | 5' | GAGGACAGGAGGCCUCGUCCGG | 3' |
|                | GRMZM2G360455    | <i>ZmPP85</i>  | 75 | 4   | 3' | AGACUCACUCGGCUCGGUUGU  | 5' |
| zma-miR171e-5p |                  |                |    |     |    | : :                    |    |
|                |                  |                |    |     | 5' | UCUGACUUUGCUGGGCCAACA  | 3' |
|                | GRMZM2G038195    | <i>ZmPP75</i>  | 86 | 3   | 3' | GUCUCGAGGGAAGUUAGGUUU  | 5' |
|                |                  |                |    |     |    | :       :              |    |
|                |                  |                |    |     | 5' | CAGAACUCCUCAAUUAAC     | 3' |
| zma-miR159j-3p | GRMZM2G133464    | <i>ZmPP88</i>  | 83 | 3.5 | 3' | GUCUCGAGGGAAGUUAGGUUU  | 5' |

---

|  |  |  |  |  |                                |
|--|--|--|--|--|--------------------------------|
|  |  |  |  |  | :       : :                    |
|  |  |  |  |  | 5' CAGAACUCCUCAAUUCGAC 3'      |
|  |  |  |  |  | 3' GUCCCGUUGAGAGGAAACCGU 5'    |
|  |  |  |  |  | : : :                          |
|  |  |  |  |  | 5' CAUGGUAGCUUCCUUUGGAA 3'     |
|  |  |  |  |  | 3' GUC-AAGUU-C-UUUCGACACCUU 5' |
|  |  |  |  |  | :                              |
|  |  |  |  |  | 5' CAGAUUCAGUGUAAAGCUGUGGAA 3' |
|  |  |  |  |  | 3' GUC-AAGUU-C-UUUCGACACCUU 5' |
|  |  |  |  |  | :                              |
|  |  |  |  |  | 5' CAGAUUCAGUGUAAAGCUGUGGAA 3' |
|  |  |  |  |  | 3' GUC-AAGUU-C-UUUCGACACCUU 5' |
|  |  |  |  |  | :                              |
|  |  |  |  |  | 5' CAGAUUCAGUGUAAAGCUGUGGAA 3' |
|  |  |  |  |  | 3' CUCCU-UACUUCGGACCAGGCU 5'   |
|  |  |  |  |  | :           :                  |
|  |  |  |  |  | 5' GAGGACAGGAGGCCUCGUCCGG 3'   |
|  |  |  |  |  | 3' UAAGGUUCCCUAACGUGACUA 5'    |
|  |  |  |  |  | :                              |
|  |  |  |  |  | 5' AGUCCCGAGGGAUAGCACUGAU 3'   |
|  |  |  |  |  | 3' UACCUCUCCUCUGGUGCAC 5'      |
|  |  |  |  |  | :       : : :                  |
|  |  |  |  |  | 5' AUGAGGAAGGAGGCCGUGUA 3'     |

---
